# Supplementary material
Source: Elsevier journal article supplement (https://comptes-rendus.academie-sciences.fr/chimie/article/10.1016/j.crci.2004.11.042/file/attach/mmc1.pdf)
Supplement: mmc1 [file mmc1.pdf]

## **A Molecular Orbital Study of N-H...Cl<sup>-</sup> and C-H...Cl<sup>-</sup> Hydrogen Bonds. Inferences on Selected Metal Complexes and on Protein ClC Cl<sup>-</sup> Channels**

**Sandra Defazio, Gabriella Tamasi, Renzo Cini**

*Department of Chemical and Biosystem Sciences and Technologies, University of Siena, Via Aldo Moro 2, I-53100 Siena, Italy. Email, cini@unisi.it.*

---

### **Supporting Material**

The orthogonal atomic coordinates for the molecules optimized via DFT, and *ab initio* methods listed in the Tables below are  $x \cdot 10$ ,  $y \cdot 10$ ,  $z \cdot 10$  Å.

## INDEX:

### ISOLATE MOLECULES

#### Calibration of the methods on small molecules

|                  |    |
|------------------|----|
| HF               | 4  |
| HCl              | 10 |
| H <sub>2</sub> O | 17 |

#### Imidazole and pyrimidine

|                  |    |
|------------------|----|
| IM               | 24 |
| IMH <sup>+</sup> | 32 |
| PYM              | 36 |
| MePYM            | 42 |

#### Other molecules: Acetamide, N-methylacetamide, methylammonium, methylamine, N-methylguanidinium, methanol, 1-hydroxy-4-methylbenzene

|      |    |
|------|----|
| AA   | 51 |
| MAA  | 55 |
| MA   | 60 |
| MAB  | 64 |
| MGU  | 68 |
| MeOH | 72 |
| HMB  | 74 |

#### Solvent effect on the structure of selected molecules

|     |    |
|-----|----|
| HF  | 80 |
| HCl | 81 |
| IM  | 83 |
| PYM | 89 |
| MAA | 91 |
| MA  | 93 |
| MGU | 95 |

### TWO-PARTICLE SYSTEMS

#### Small particle system

|                        |     |
|------------------------|-----|
| F-H...F <sup>-</sup>   | 97  |
| Cl-H...Cl <sup>-</sup> | 100 |
| F-H...OH <sub>2</sub>  | 103 |
| HO-H...F-H             | 108 |
| Cl-H...OH <sub>2</sub> | 113 |
| HO-H...Cl-H            | 121 |

#### Imidazole...X<sup>-</sup> (X: Cl<sup>-</sup>, F<sup>-</sup>)

|                            |     |
|----------------------------|-----|
| (IM)N1-H...Cl <sup>-</sup> | 123 |
| (IM)C2-H...Cl <sup>-</sup> | 129 |

|                                                                         |     |
|-------------------------------------------------------------------------|-----|
| (IM)C4-H...Cl <sup>-</sup>                                              | 133 |
| (IM)C5-H...Cl <sup>-</sup>                                              | 137 |
| (IMH <sup>+</sup> )N...H <sup>+</sup> ...Cl <sup>-</sup>                | 141 |
| (IM)N1-H...F <sup>-</sup>                                               | 145 |
| (IM)C2-H...F <sup>-</sup>                                               | 147 |
| <b>Imidazole...Imidazole systems</b>                                    |     |
| (IM)N1-H...N3'(IM) coplanar                                             | 149 |
| (IM)N1-H...N3'(IM) free                                                 | 152 |
| (IM)C2-H...N3'(IM)                                                      | 155 |
| <b>Pyrimidine...Cl<sup>-</sup> systems</b>                              |     |
| (PYM)C2-H...Cl <sup>-</sup>                                             | 158 |
| (PYM)C5-H...Cl <sup>-</sup>                                             | 162 |
| (PYM)C6-H...Cl <sup>-</sup>                                             | 164 |
| (MePYM)C-H...Cl <sup>-</sup>                                            | 168 |
| <b>Pyrimidine...Pyrimidine system</b>                                   |     |
| (PYM)C2-H...N1'(PYM)/(PYM)C6'-H...N3(PYM)                               | 171 |
| (PYM)C2-H...N1'(PYM)                                                    | 177 |
| (PYM)C5-H...N1'(PYM)                                                    | 180 |
| <b>Other molecule...Cl<sup>-</sup> systems</b>                          |     |
| (AA)N1-H...Cl <sup>-</sup>                                              | 186 |
| (MAA)N1-H...Cl <sup>-</sup>                                             | 190 |
| (MAA)N1-H...F <sup>-</sup>                                              | 196 |
| (MA)N...H <sup>+</sup> ...Cl <sup>-</sup>                               | 202 |
| (MAB)N1-H...Cl <sup>-</sup>                                             | 206 |
| (MGU)NH <sub>2</sub> NH...Cl <sup>-</sup>                               | 210 |
| (MGU)NH <sub>2</sub> NH <sub>2</sub> ...Cl <sup>-</sup>                 | 216 |
| (MeOH)OH...Cl <sup>-</sup>                                              | 222 |
| (HMB)O-H...Cl <sup>-</sup>                                              | 226 |
| <b>Solvent effects on the structure of selected two-particle system</b> |     |
| (IM)N1-H...Cl <sup>-</sup>                                              | 232 |
| (IM)C2-H...Cl <sup>-</sup>                                              | 234 |
| (IM)N1-H...F <sup>-</sup>                                               | 236 |
| <b>ENERGY</b>                                                           | 239 |
| <b>VIBRATION FREQUENCIES</b>                                            |     |
| <b>Selected vibration frequencies</b>                                   | 244 |

**ISOLATE MOLECULES**  
**Calibration of the methods on small molecules**

**HF**

Table 1S. Computed atomic orthogonal coordinates for HF optimized at the *ab initio*-RHF/6-31G\* level.

| Atom | x       | y       | z        |
|------|---------|---------|----------|
| H1   | 0.00000 | 0.00000 | -0.08196 |
| F2   | 0.00000 | 0.00000 | 0.00911  |

Table 2S. Computed bond lengths (Å) and angles (°) for HF optimized at the *ab initio*-RHF/6-31G\* level.

| Vector | Length |
|--------|--------|
| F2-H1  | 0.911  |

Table 3S. Computed atomic orthogonal coordinates for HF optimized at the DFT-B3LYP/6-31G\*\* level.

| Atom | x       | y       | z        |
|------|---------|---------|----------|
| H1   | 0.00000 | 0.00000 | -0.08329 |
| F2   | 0.00000 | 0.00000 | 0.00925  |

Table 4S. Computed bond lengths (Å) and angles (°) for HF optimized at the DFT-B3LYP/6-31G\*\* level.

| Vector | Length |
|--------|--------|
| F2-H1  | 0.925  |

Table 5S. Computed atomic orthogonal coordinates for HF optimized at the *ab initio*-CCSD(T)/6-31G\*\* level.

| Atom | x       | y       | z        |
|------|---------|---------|----------|
| F2   | 0.00000 | 0.00000 | 0.00921  |
| H1   | 0.00000 | 0.00000 | -0.08290 |

Table 6S. Computed bond lengths (Å) and angles (°) for HF optimized at the *ab initio*-CCSD(T)/6-31G\*\* level.

| Vector | Length |
|--------|--------|
| F2-H1  | 0.921  |

Table 7S. Computed atomic orthogonal coordinates for HF optimized at the DFT-B3LYP/6-31+G\*\* level.

| Atom | x       | Y       | z        |
|------|---------|---------|----------|
| F1   | 0.00000 | 0.00000 | 0.00928  |
| H1   | 0.00000 | 0.00000 | -0.08349 |

Table 8S. Computed bond lengths (Å) and angles (°) for HF optimized at the DFT-B3LYP/6-31+G\*\* level.

| Vector | Length |
|--------|--------|
| F1-H1  | 0.928  |

Table 9S. Computed atomic orthogonal coordinates for HF optimized at the *ab initio*-CCSD(T)/6-31+G\*\* level.

| Atom | x       | y       | z        |
|------|---------|---------|----------|
| H1   | 0.00000 | 0.00000 | -0.08328 |
| F2   | 0.00000 | 0.00000 | 0.00925  |

Table 10S. Computed bond lengths (Å) and angles (°) for HF optimized at the *ab initio*-CCSD(T)/6-31+G\*\* level.

| Vector | Length |
|--------|--------|
| F2-H1  | 0.925  |



Table 11S. Computed atomic orthogonal coordinates for HF optimized at the *ab initio*-MP4(SDTQ)/6-31+G\*\* level.

| Atom | x       | y       | z        |
|------|---------|---------|----------|
| F1   | 0.00000 | 0.00000 | 0.00926  |
| H1   | 0.00000 | 0.00000 | -0.08338 |

Table 12S. Computed bond lengths (Å) and angles (°) for HCl optimized at the *ab initio*-MP4(SDTQ)/6-31+G\*\* level.

| Vector | Length |
|--------|--------|
| F1-H1  | 0.926  |

**HCl**

Table 13S. Computed atomic orthogonal coordinates for HCl optimized at the DFT-B3LYP/6-31G\*\* level

| Atom | x       | y       | z        |
|------|---------|---------|----------|
| Cl1  | 0.00000 | 0.00000 | 0.00715  |
| H1   | 0.00000 | 0.00000 | -0.12146 |

Table 14S. Computed bond lengths (Å) and angles (°) for HCl optimized at the DFT-B3LYP/6-31G\*\* level.

| Vector | Length |
|--------|--------|
| Cl1-H1 | 1.286  |

Table 15S. Computed atomic orthogonal coordinates for HCl optimized at the DFT-B3LYP/6-31+G\*\* level

| Atom | X       | y       | z        |
|------|---------|---------|----------|
| Cl1  | 0.00000 | 0.00000 | 0.00715  |
| H1   | 0.00000 | 0.00000 | -0.12153 |

Table 16S. Computed bond lengths (Å) and angles (°) for HCl optimized at the DFT-B3LYP/6-31+G\*\* level.

| Vector | Length |
|--------|--------|
| Cl1-H1 | 1.287  |

Table 17S. Computed atomic orthogonal coordinates for HCl optimized at the DFT-B3LYP/6-31++G\*\* level

| Atom | X       | y       | Z        |
|------|---------|---------|----------|
| C11  | 0.00000 | 0.00000 | 0.00715  |
| H1   | 0.00000 | 0.00000 | -0.12154 |

Table 18S. Computed bond lengths (Å) and angles (°) for HCl optimized at the DFT-B3LYP/6-31++G\*\* level.

| Vector | Length |
|--------|--------|
| C11-H1 | 1.287  |

Table 19S. Computed atomic orthogonal coordinates for HCl optimized at the *ab initio*-MP2/6-31+G\*\* level

| Atom | x       | y       | z        |
|------|---------|---------|----------|
| Cl1  | 0.00000 | 0.00000 | 0.00706  |
| H1   | 0.00000 | 0.00000 | -0.11995 |

Table 20S. Computed bond lengths (Å) and angles (°) for HCl optimized at the *ab initio*-MP2/6-31+G\*\* level.

| Vector | Length |
|--------|--------|
| Cl1-H1 | 1.270  |

Table 21S. Computed atomic orthogonal coordinates for HCl optimized at the *ab initio*-CCSD(T)/6-31G\*\* level

| Atom | x       | y       | z        |
|------|---------|---------|----------|
| C11  | 0.00000 | 0.00000 | 0.00707  |
| H2   | 0.00000 | 0.00000 | -0.12027 |

Table 22S. Computed bond lengths (Å) and angles (°) for HCl optimized at the *ab initio*-CCSD(T)/6-31G\*\* level.

| Vector | Length |
|--------|--------|
| C11-H2 | 1.273  |

Table 23S. Computed atomic orthogonal coordinates for HCl optimized at the *ab initio*-CCSD(T)/6-31++G\*\* level

| Atom | x       | y       | z        |
|------|---------|---------|----------|
| C11  | 0.00000 | 0.00000 | 0.00708  |
| H2   | 0.00000 | 0.00000 | -0.12036 |

Table 24S. Computed bond lengths (Å) and angles (°) for HCl optimized at the *ab initio*-CCSD(T)/6-31++G\*\* level.

| Vector | Length |
|--------|--------|
| C11-H2 | 1.274  |

Table 25S. Computed atomic orthogonal coordinates for HCl optimized at the *ab initio*-CCSD(T)/6-31+G\*\* level

| Atom | x       | y       | z        |
|------|---------|---------|----------|
| C11  | 0.00000 | 0.00000 | 0.00708  |
| H2   | 0.00000 | 0.00000 | -0.12035 |

Table 26S. Computed bond lengths (Å) and angles (°) for HCl optimized at the *ab initio*-CCSD(T)/6-31+G\*\* level.

| Vector | Length |
|--------|--------|
| C11-H2 | 1.274  |



**H<sub>2</sub>O**Table 27S. Computed atomic orthogonal coordinates for H<sub>2</sub>O optimized at the DFT-B3LYP/6-31G\*\* level.

| Atom | x       | y        | z        |
|------|---------|----------|----------|
| O1   | 0.00000 | 0.00000  | 0.01192  |
| H2   | 0.00000 | 0.07593  | -0.04768 |
| H3   | 0.00000 | -0.07593 | -0.04768 |

Table 28S. Computed bond lengths (Å) and angles (°) for H<sub>2</sub>O optimized at the DFT-B3LYP/6-31G\*\* level.

| Vector | Length |
|--------|--------|
| O1-H2  | 0.965  |
| O1-H3  | 0.965  |

  

| Vectors  | Angle  |
|----------|--------|
| H2-O1-H3 | 103.74 |

Table 29S. Computed atomic orthogonal coordinates for H<sub>2</sub>O optimized at the DFT-B3LYP/6-31+G\*\* level.

| Atom | x       | y        | z        |
|------|---------|----------|----------|
| O1   | 0.00000 | 0.00000  | 0.01165  |
| H2   | 0.00000 | 0.07695  | -0.04659 |
| H3   | 0.00000 | -0.07695 | -0.04659 |

Table 30S. Computed bond lengths (Å) and angles (°) for H<sub>2</sub>O optimized at the DFT-B3LYP/6-31+G\*\* level.

| Vector | Distance |
|--------|----------|
| O1-H2  | 0.965    |
| O1-H3  | 0.965    |

  

| Vectors  | Angle  |
|----------|--------|
| H2-O1-H3 | 105.76 |

Table 31S. Computed atomic orthogonal coordinates for H<sub>2</sub>O optimized at the DFT-B3LYP/6-31++G\*\* level.

| Atom | x       | y        | z        |
|------|---------|----------|----------|
| O1   | 0.00000 | 0.00000  | 0.01166  |
| H2   | 0.00000 | 0.07694  | -0.04664 |
| H3   | 0.00000 | -0.07694 | -0.04664 |

Table 32S. Computed bond lengths (Å) and angles (°) for H<sub>2</sub>O optimized at the DFT-B3LYP/6-31++G\*\* level.

| Vector | Length |
|--------|--------|
| O1-H2  | 0.965  |
| O1-H3  | 0.965  |

  

| Vectors  | Angle  |
|----------|--------|
| H2-O1-H3 | 105.70 |

Table 33S. Computed atomic orthogonal coordinates for H<sub>2</sub>O optimized at the *ab initio*-CCSD(T)/6-31G\*\* level.

| Atom | x       | y        | z        |
|------|---------|----------|----------|
| O1   | 0.00000 | 0.00000  | 0.01186  |
| H2   | 0.00000 | 0.07572  | -0.04746 |
| H3   | 0.00000 | -0.07572 | -0.04746 |

Table 34S. Computed bond lengths (Å) and angles (°) for H<sub>2</sub>O optimized at the *ab initio*-CCSD(T)/6-31G\*\* level.

| Vector | Length |
|--------|--------|
| O1-H2  | 0.962  |
| O1-H3  | 0.962  |

  

| Vectors  | Angle  |
|----------|--------|
| H2-O1-H3 | 103.85 |

Table 35S. Computed atomic orthogonal coordinates for H<sub>2</sub>O optimized at the *ab initio*-CCSD(T)/6-31++G\*\* level.

| Atom | x       | y        | z        |
|------|---------|----------|----------|
| O1   | 0.00000 | 0.00000  | 0.01170  |
| H2   | 0.00000 | 0.07658  | -0.04679 |
| H3   | 0.00000 | -0.07658 | -0.04679 |

Table 36S. Computed bond lengths (Å) and angles (°) for H<sub>2</sub>O optimized at the *ab initio*-CCSD(T)/6-31++G\*\* level.

| Vector | Length |
|--------|--------|
| O1-H2  | 0.964  |
| O1-H3  | 0.964  |

  

| Vectors  | Angle  |
|----------|--------|
| H2-O1-H3 | 105.26 |

Table 37S. Computed atomic orthogonal coordinates for H<sub>2</sub>O optimized at the *ab initio*-CCSD(T)/6-31+G\*\* level.

| Atom | x       | y        | z        |
|------|---------|----------|----------|
| O1   | 0.00000 | 0.00000  | 0.01168  |
| H2   | 0.00000 | 0.07660  | -0.04674 |
| H3   | 0.00000 | -0.07660 | -0.04674 |

Table 38S. Computed bond lengths (Å) and angles (°) for H<sub>2</sub>O optimized at the *ab initio*-CCSD(T)/6-31+G\*\* level.

| Vector | Length |
|--------|--------|
| O1-H2  | 0.963  |
| O1-H3  | 0.963  |

  

| Vectors  | Angle  |
|----------|--------|
| H2-O1-H3 | 105.34 |

Table 39S. Computed atomic orthogonal coordinates for H<sub>2</sub>O optimized at the *ab initio* MP2/6-31+G\*\* level.

| Atom | x       | y        | z        |
|------|---------|----------|----------|
| O1   | 0.00000 | 0.00000  | 0.01167  |
| H2   | 0.00000 | 0.07663  | -0.04668 |
| H3   | 0.00000 | -0.07663 | -0.04668 |

Table 40S. Computed bond lengths (Å) and angles (°) for H<sub>2</sub>O optimized at the *ab initio* MP2/6-31+G\*\* level.

| Vector | Length |
|--------|--------|
| O1-H2  | 0.963  |
| O1-H3  | 0.963  |

  

| Vectors  | Angle  |
|----------|--------|
| H2-O1-H3 | 105.42 |

**ISOLATE MOLECULES**  
**Imidazole and pyrimidine**

**IM**

Table 41S. Computed atomic orthogonal coordinates for IM optimized at the DFT-B3LYP/6-31G\*\* level.

| Atom | x        | y        | z       |
|------|----------|----------|---------|
| H2   | -0.21025 | 0.06626  | 0.00000 |
| H1   | -0.00098 | 0.21142  | 0.00000 |
| N1   | 0.00000  | 0.11060  | 0.00000 |
| C2   | -0.10905 | 0.02815  | 0.00000 |
| H5   | 0.21203  | 0.07052  | 0.00000 |
| N3   | -0.07429 | -0.09868 | 0.00000 |
| C5   | 0.11205  | 0.03001  | 0.00000 |
| C4   | 0.06355  | -0.09834 | 0.00000 |
| H4   | 0.11997  | -0.19054 | 0.00000 |



Table 42S. Computed bond lengths (Å) and angles (°) for IM optimized at the DFT-B3LYP/6-31G\*\* level.

| Vector | Length |
|--------|--------|
| N1-C2  | 1.367  |
| N1-C5  | 1.380  |
| N3-C2  | 1.315  |
| N3-C4  | 1.378  |
| C4-C5  | 1.372  |
| H1-N1  | 1.008  |
| H2-C2  | 1.081  |
| H4-C4  | 1.081  |
| H5-C5  | 1.079  |

  

| Vectors  | Angle  |
|----------|--------|
| H1-N1-C2 | 126.54 |
| H1-N1-C5 | 126.28 |
| C2-N1-C5 | 107.18 |
| C2-N3-C4 | 105.19 |
| H2-C2-N3 | 125.96 |
| H2-C2-N1 | 122.27 |
| N3-C2-N1 | 111.77 |
| H4-C4-C5 | 127.84 |
| H4-C4-N3 | 121.32 |
| C5-C4-N3 | 110.84 |
| H5-C5-C4 | 132.76 |
| H5-C5-N1 | 122.22 |
| C4-C5-N1 | 105.02 |

Table 43S. Computed atomic orthogonal coordinates for IM optimized at the DFT-B3LYP/6-31+G\*\* level.

| Atom | x        | y        | z       |
|------|----------|----------|---------|
| H5   | 0.21222  | 0.07036  | 0.00000 |
| H4   | 0.11990  | -0.19085 | 0.00000 |
| H2   | -0.21052 | 0.06617  | 0.00000 |
| H1   | -0.00106 | 0.21156  | 0.00000 |
| C5   | 0.11214  | 0.03002  | 0.00000 |
| N3   | -0.07423 | -0.09861 | 0.00000 |
| N1   | 0.00000  | 0.11067  | 0.00000 |
| C4   | 0.06365  | -0.09859 | 0.00000 |
| C2   | -0.10927 | 0.02830  | 0.00000 |

Table 44S. Computed bond lengths (Å) and angles (°) for IM optimized at the DFT-B3LYP/6-31+G\*\* level.

| Vector | Length |
|--------|--------|
| N1-C2  | 1.368  |
| N1-C5  | 1.381  |
| N3-C2  | 1.317  |
| N3-C4  | 1.379  |
| C4-C5  | 1.374  |
| H1-N1  | 1.009  |
| H2-C2  | 1.081  |
| H4-C4  | 1.081  |
| H5-C5  | 1.079  |

  

| Vectors  | Angle  |
|----------|--------|
| H1-N1-C2 | 126.41 |
| H1-N1-C5 | 126.33 |
| C2-N1-C5 | 107.27 |
| C2-N3-C4 | 105.43 |
| H2-C2-N3 | 125.94 |
| H2-C2-N1 | 122.48 |
| N3-C2-N1 | 111.57 |
| H4-C4-C5 | 127.97 |
| H4-C4-N3 | 121.36 |
| C5-C4-N3 | 110.67 |
| H5-C5-C4 | 132.61 |
| H5-C5-N1 | 122.32 |
| C4-C5-N1 | 105.07 |

Table 45S. Computed atomic orthogonal coordinates for IM optimized at the *ab initio*-CCSDT/6-31G\*\* level.

---

| Atom | x        | y        | Z       |
|------|----------|----------|---------|
| H5   | 0.21221  | 0.07079  | 0.00000 |
| H4   | 0.12026  | -0.19037 | 0.00000 |
| H2   | -0.21014 | 0.06644  | 0.00000 |
| H1   | -0.00124 | 0.21152  | 0.00000 |
| C5   | 0.11246  | 0.03024  | 0.00000 |
| N3   | -0.07483 | -0.09932 | 0.00000 |
| N1   | 0.00000  | 0.11092  | 0.00000 |
| C4   | 0.06387  | -0.09847 | 0.00000 |
| C2   | -0.10922 | 0.02830  | 0.00000 |

---

Table 46S. Computed bond lengths (Å) and angles (°) for IM optimized at the *ab initio*-CCSDT/6-31G\*\* level.

| Vector | Length |
|--------|--------|
| N1-C2  | 1.369  |
| N1-C5  | 1.384  |
| N3-C2  | 1.322  |
| N3-C4  | 1.387  |
| C4-C5  | 1.376  |
| H1-N1  | 1.006  |
| H2-C2  | 1.079  |
| H4-C4  | 1.078  |
| H5-C5  | 1.077  |

  

| Vectors  | Angle  |
|----------|--------|
| H1-N1-C2 | 126.40 |
| H1-N1-C5 | 126.36 |
| C2-N1-C5 | 107.24 |
| C2-N3-C4 | 104.73 |
| H2-C2-N3 | 125.78 |
| H2-C2-N1 | 122.19 |
| N3-C2-N1 | 112.02 |
| H4-C4-C5 | 127.78 |
| H4-C4-N3 | 121.18 |
| C5-C4-N3 | 111.03 |
| H5-C5-C4 | 132.80 |
| H5-C5-N1 | 122.22 |
| C4-C5-N1 | 104.97 |

Table 47S. Computed atomic orthogonal coordinates for IM optimized at the *ab initio*-MP2/6-31+G\*\* level.

---

| Atom | x        | Y        | z       |
|------|----------|----------|---------|
| N1   | 0.00000  | 0.11045  | 0.00000 |
| C2   | -0.10915 | 0.02900  | 0.00000 |
| N3   | -0.07449 | -0.09885 | 0.00000 |
| C4   | 0.06388  | -0.09898 | 0.00000 |
| C5   | 0.11193  | 0.02993  | 0.00000 |
| H1   | -0.00106 | 0.21254  | 0.00000 |
| H2   | -0.21047 | 0.06742  | 0.00000 |
| H4   | 0.12064  | -0.19128 | 0.00000 |
| H5   | 0.21235  | 0.07038  | 0.00000 |

---

Table 48S. Computed bond lengths (Å) and angles (°) for IM optimized at the *ab initio*-MP2/6-31+G\*\* level.

| Vector | Length |
|--------|--------|
| N1-C2  | 1.362  |
| N1-C5  | 1.379  |
| N3-C2  | 1.325  |
| N3-C4  | 1.384  |
| C4-C5  | 1.376  |
| H1-N1  | 1.021  |
| H2-C2  | 1.084  |
| H4-C4  | 1.084  |
| H5-C5  | 1.083  |

  

| Vectors  | Angle  |
|----------|--------|
| H1-N1-C2 | 126.14 |
| H1-N1-C5 | 126.33 |
| C2-N1-C5 | 107.54 |
| C2-N3-C4 | 105.22 |
| H2-C2-N3 | 125.93 |
| H2-C2-N1 | 122.50 |
| N3-C2-N1 | 111.56 |
| H4-C4-C5 | 127.97 |
| H4-C4-N3 | 121.64 |
| C5-C4-N3 | 110.39 |
| H5-C5-C4 | 132.38 |
| H5-C5-N1 | 122.33 |
| C4-C5-N1 | 105.29 |

**IMH<sup>+</sup>**Table 49S. Computed atomic orthogonal coordinates for IMH<sup>+</sup> optimized at the DFT-B3LYP/6-31+G\*\*level.

| Atom | x        | y        | z       |
|------|----------|----------|---------|
| H4   | 0.21335  | 0.07700  | 0.00000 |
| H5   | 0.12748  | -0.18756 | 0.00000 |
| H2   | -0.21145 | 0.06861  | 0.00000 |
| H1   | -0.12745 | -0.17242 | 0.00000 |
| H3   | -0.00202 | 0.21439  | 0.00000 |
| C4   | 0.11412  | 0.03471  | 0.00000 |
| C5   | 0.07203  | -0.09505 | 0.00000 |
| C2   | -0.10875 | 0.03527  | 0.00000 |
| N1   | -0.06633 | -0.09148 | 0.00000 |
| N3   | 0.00000  | 0.11298  | 0.00000 |



Table 50S. Computed bond lengths (Å) and angles (°) for IMH<sup>+</sup> optimized at the DFT-B3LYP/6-31+G\*\* level.

| Vector   | Length |
|----------|--------|
| N1-C2    | 1.337  |
| N1-C5    | 1.384  |
| N3-C2    | 1.337  |
| N3-C4    | 1.384  |
| C4-C5    | 1.364  |
| H1-N1    | 1.014  |
| H2-C2    | 1.080  |
| H3-N3    | 1.014  |
| H4-C4    | 1.079  |
| H5-C5    | 1.079  |
| Vectors  | Angle  |
| H1-N1-C2 | 124.44 |
| H1-N1-C5 | 125.58 |
| C2-N1-C5 | 109.98 |
| H3-N3-C2 | 124.41 |
| H3-N3-C4 | 125.59 |
| C2-N3-C4 | 110.01 |
| H2-C2-N1 | 126.49 |
| H2-C2-N3 | 126.47 |
| N1-C2-N3 | 107.04 |
| H4-C4-C5 | 131.05 |
| H4-C4-N3 | 122.47 |
| C5-C4-N3 | 106.47 |
| H5-C5-C4 | 131.09 |
| H5-C5-N1 | 122.42 |
| C4-C5-N1 | 106.49 |

Table 51S. Computed atomic orthogonal coordinates for IMH<sup>+</sup> optimized at the *ab initio*-MP2/6-31+G\*\* level.

| Atom | x        | Y        | z       |
|------|----------|----------|---------|
| N1   | -0.06567 | -0.09176 | 0.00000 |
| C2   | -0.10921 | 0.03505  | 0.00000 |
| N3   | 0.00000  | 0.11281  | 0.00000 |
| C4   | 0.11390  | 0.03551  | 0.00000 |
| C5   | 0.07197  | -0.09514 | 0.00000 |
| H1   | -0.12656 | -0.17279 | 0.00000 |
| H2   | -0.21167 | 0.06795  | 0.00000 |
| H3   | -0.00238 | 0.21415  | 0.00000 |
| H4   | 0.21273  | 0.07795  | 0.00000 |
| H5   | 0.12760  | -0.18717 | 0.00000 |

Table 52S. Computed bond lengths (Å) and angles (°) for IMH<sup>+</sup> optimized at the *ab initio*-MP2/6-31+G\*\* level.

| Vector   | Length |
|----------|--------|
| N1-C2    | 1.341  |
| N1-C5    | 1.377  |
| N3-C2    | 1.341  |
| N3-C4    | 1.377  |
| C4-C5    | 1.372  |
| H1-N1    | 1.014  |
| H2-C2    | 1.076  |
| H3-N3    | 1.014  |
| H4-C4    | 1.076  |
| H5-C5    | 1.075  |
| Vectors  | Angle  |
| H1-N1-C2 | 124.13 |
| H1-N1-C5 | 125.52 |
| C2-N1-C5 | 110.36 |
| H3-N3-C2 | 124.11 |
| H3-N3-C4 | 125.51 |
| C2-N3-C4 | 110.38 |
| H2-C2-N3 | 126.75 |
| H2-C2-N1 | 126.75 |
| N3-C2-N1 | 106.50 |
| H4-C4-C5 | 131.03 |
| H4-C4-N3 | 122.60 |
| C5-C4-N3 | 106.37 |
| H5-C5-C4 | 131.05 |
| H5-C5-N1 | 122.56 |
| C4-C5-N1 | 106.39 |

**PYM**

Table 53S. Computed atomic orthogonal coordinates for PYM optimized at the DFT-B3LYP/6-31G\*\*level.

| Atom | x        | y        | z       |
|------|----------|----------|---------|
| H2   | 0.00002  | 0.23977  | 0.00000 |
| H6   | -0.21537 | -0.11186 | 0.00000 |
| H4   | 0.21533  | -0.11190 | 0.00000 |
| H5   | -0.00001 | -0.24407 | 0.00000 |
| C2   | 0.00000  | 0.13095  | 0.00000 |
| N3   | 0.11993  | 0.07163  | 0.00000 |
| N1   | -0.11988 | 0.07165  | 0.00000 |
| C6   | -0.11846 | -0.06224 | 0.00000 |
| C4   | 0.11843  | -0.06225 | 0.00000 |
| C5   | -0.00003 | -0.13560 | 0.00000 |

Table 54S. Computed bond lengths (Å) and angles (°) for PYM optimized at the DFT-B3LYP/6-31G\*\* level.

| Vector   | Distance |
|----------|----------|
| N1-C2    | 1.337    |
| N1-C6    | 1.339    |
| N3-C2    | 1.338    |
| N3-C4    | 1.339    |
| C4-C5    | 1.393    |
| C5-C6    | 1.393    |
| H2-C2    | 1.088    |
| H4-C4    | 1.089    |
| H5-C5    | 1.085    |
| H6-C6    | 1.089    |
| Vectors  | Angle    |
| C2-N1-C6 | 115.71   |
| C2-N3-C4 | 115.68   |
| H2-C2-N1 | 116.33   |
| H2-C2-N3 | 116.31   |
| N1-C2-N3 | 127.36   |
| H4-C4-N3 | 116.49   |
| H4-C4-C5 | 121.10   |
| N3-C4-C5 | 122.41   |
| H5-C5-C6 | 121.79   |
| H5-C5-C4 | 121.76   |
| C6-C5-C4 | 116.46   |
| H6-C6-N1 | 116.51   |
| H6-C6-C5 | 121.11   |
| N1-C6-C5 | 122.38   |

Table 55S. Computed atomic orthogonal coordinates for PYM optimized at the DFT-B3LYP/6-31+G\*\* level.

| Atom | x        | y        | z       |
|------|----------|----------|---------|
| H5   | -0.00001 | -0.24421 | 0.00000 |
| H6   | -0.21559 | -0.11172 | 0.00000 |
| H4   | 0.21556  | -0.11175 | 0.00000 |
| H2   | 0.00002  | 0.24000  | 0.00000 |
| N3   | 0.11985  | 0.07161  | 0.00000 |
| N1   | -0.11981 | 0.07163  | 0.00000 |
| C5   | -0.00002 | -0.13572 | 0.00000 |
| C6   | -0.11862 | -0.06235 | 0.00000 |
| C4   | 0.11859  | -0.06236 | 0.00000 |
| C2   | 0.00000  | 0.13127  | 0.00000 |

Table 56S. Computed bond lengths (Å) and angles (°) for PYM optimized at the DFT-B3LYP/6-31+G\*\* level.

| Vector | Distance |
|--------|----------|
| N1-C2  | 1.338    |
| N1-C6  | 1.340    |
| N3-C2  | 1.339    |
| N3-C4  | 1.340    |
| C4-C5  | 1.395    |
| C5-C6  | 1.395    |
| H2-C2  | 1.087    |
| H4-C4  | 1.088    |
| H5-C5  | 1.085    |
| H6-C6  | 1.088    |

  

| Vectors  | Angle  |
|----------|--------|
| C2-N1-C6 | 115.95 |
| C2-N3-C4 | 115.92 |
| H2-C2-N1 | 116.47 |
| H2-C2-N3 | 116.45 |
| N1-C2-N3 | 127.07 |
| H4-C4-N3 | 116.45 |
| H4-C4-C5 | 121.27 |
| N3-C4-C5 | 122.28 |
| H5-C5-C4 | 121.73 |
| H5-C5-C6 | 121.75 |
| C4-C5-C6 | 116.52 |
| H6-C6-N1 | 116.47 |
| H6-C6-C5 | 121.28 |
| N1-C6-C5 | 122.25 |

Table 57S. Computed atomic orthogonal coordinates for PYM optimized at the *ab initio*-MP2/6-31+G\*\* level.

---

| Atom | x        | y        | z       |
|------|----------|----------|---------|
| N1   | 0.12042  | 0.07181  | 0.00000 |
| C2   | 0.00000  | 0.13153  | 0.00000 |
| N3   | -0.12043 | 0.07181  | 0.00000 |
| C4   | -0.11881 | -0.06273 | 0.00000 |
| C5   | 0.00000  | -0.13564 | 0.00000 |
| C6   | 0.11881  | -0.06274 | 0.00000 |
| H2   | 0.00000  | 0.23980  | 0.00000 |
| H4   | -0.21537 | -0.11192 | 0.00000 |
| H5   | -0.00001 | -0.24380 | 0.00000 |
| H6   | 0.21538  | -0.11192 | 0.00000 |

---



Table 58S. Computed bond lengths (Å) and angles (°) for PYM optimized at the *ab initio*-MP2/6-31+G\*\* level.

| Vector   | Length |
|----------|--------|
| N1-C2    | 1.344  |
| N1-C6    | 1.346  |
| N3-C2    | 1.344  |
| N3-C4    | 1.345  |
| C4-C5    | 1.394  |
| C5-C6    | 1.394  |
| H2-C2    | 1.083  |
| H4-C4    | 1.084  |
| H5-C5    | 1.082  |
| H6-C6    | 1.084  |
| Vectors  | Angle  |
| C2-N1-C6 | 115.69 |
| C2-N3-C4 | 115.69 |
| H2-C2-N1 | 116.38 |
| H2-C2-N3 | 116.38 |
| N1-C2-N3 | 127.25 |
| H4-C4-N3 | 116.31 |
| H4-C4-C5 | 121.47 |
| N3-C4-C5 | 122.23 |
| H5-C5-C4 | 121.53 |
| H5-C5-C6 | 121.54 |
| C6-C5-C4 | 116.93 |
| H6-C6-N1 | 116.30 |
| H6-C6-C5 | 121.48 |
| N1-C6C5  | 122.22 |

**MePYM**

Table 59S. Computed atomic orthogonal coordinates for MePYM optimized at the DFT-B3LYP/Lanl2dz level.

| Atom | x        | y        | z        |
|------|----------|----------|----------|
| N1   | -0.19094 | -0.00638 | 0.00001  |
| C2   | -0.11275 | -0.11711 | 0.00000  |
| N3   | 0.02292  | -0.11963 | -0.00001 |
| C4   | 0.08839  | 0.00008  | -0.00001 |
| C5   | 0.01493  | 0.12100  | -0.00001 |
| C6   | -0.12524 | 0.11287  | 0.00000  |
| C7   | 0.23937  | -0.00261 | 0.00000  |
| H2   | -0.16355 | -0.21304 | 0.00000  |
| H5   | 0.06531  | 0.21716  | -0.00002 |
| H6   | -0.18742 | 0.20200  | 0.00001  |
| H7a  | 0.27418  | -0.10619 | -0.00032 |
| H7b  | 0.27975  | 0.04870  | -0.08828 |
| H7c  | 0.27970  | 0.04808  | 0.08867  |

Table 60S. Computed bond lengths (Å) and angles (°) for MePYM optimized at the DFT-B3LYP/Lanl2dz level.

| Vector | Length |
|--------|--------|
| N1-C2  | 1.356  |
| N1-C6  | 1.362  |
| N3-C2  | 1.357  |
| N3-C4  | 1.364  |
| C4-C5  | 1.415  |
| C4-C7  | 1.510  |
| C5-C6  | 1.404  |
| H2-C2  | 1.086  |
| H5-C5  | 1.086  |
| H6-C6  | 1.087  |
| H7a-C7 | 1.093  |
| H7b-C7 | 1.098  |
| H7c-C7 | 1.098  |

  

| Vectors    | Angle  |
|------------|--------|
| C2-N1-C6   | 115.92 |
| C2-N3-C4   | 117.61 |
| H2-C2-N1   | 116.87 |
| H2-C2-N3   | 116.84 |
| N1-C2-N3   | 126.29 |
| N3-C4-C5   | 120.05 |
| N3-C4-C7   | 117.65 |
| C5-C4-C7   | 122.30 |
| H5-C5-C6   | 120.97 |
| H5-C5-C4   | 121.07 |
| C6-C5-C4   | 117.96 |
| H6-C6-N1   | 116.25 |
| H6-C6-C5   | 121.58 |
| N1-C6-C5   | 122.17 |
| H7a-C7-H7b | 108.87 |
| H7a-C7-H7c | 108.84 |
| H7a-C7-C4  | 109.60 |
| H7b-C7-H7c | 107.36 |

|           |        |
|-----------|--------|
| H7b-C7-C4 | 111.06 |
| H7c-C7-C4 | 111.04 |

---

Table 61S. Computed atomic orthogonal coordinates for MePYM optimized at the DFT-B3LYP/6-31G\*\* level.

---

| Atom | x        | y        | z        |
|------|----------|----------|----------|
| N1   | 0.18916  | -0.00697 | 0.00000  |
| C2   | 0.11054  | -0.11493 | 0.00000  |
| N3   | -0.02320 | -0.11840 | 0.00000  |
| C4   | -0.08671 | -0.00006 | 0.00000  |
| C5   | -0.01410 | 0.11978  | 0.00000  |
| C6   | 0.12451  | 0.11053  | 0.00000  |
| C7   | -0.23726 | -0.00208 | 0.00000  |
| H2   | 0.16093  | -0.21142 | 0.00000  |
| H5   | -0.06409 | 0.21614  | 0.00000  |
| H6   | 0.18653  | 0.20001  | 0.00000  |
| H7a  | -0.27711 | 0.04859  | 0.08859  |
| H7b  | -0.27717 | 0.05002  | -0.08773 |
| H7c  | -0.27272 | -0.10521 | -0.00081 |

---

Table 62S. Computed bond lengths (Å) and angles (°) for MePYM optimized at the DFT-B3LYP/6-31G\*\* level.

| Vector     | Distance |
|------------|----------|
| N1-C2      | 1.336    |
| N1-C6      | 1.341    |
| N3-C2      | 1.338    |
| N3-C4      | 1.343    |
| C2-N1      | 1.336    |
| C2-N3      | 1.338    |
| C4-C5      | 1.401    |
| C4-C7      | 1.506    |
| C5-C6      | 1.389    |
| H2-C2      | 1.089    |
| H5-C5      | 1.086    |
| H6-C6      | 1.089    |
| H7a-C7     | 1.096    |
| H7b-C7     | 1.096    |
| H7c-C7     | 1.091    |
| Vectors    | Angle    |
| C2-N1-C6   | 115.12   |
| C2-N3-C4   | 116.74   |
| H2-C2-N1   | 116.36   |
| H2-C2-N3   | 116.09   |
| N1-C2-N3   | 127.55   |
| N3-C4-C5   | 120.57   |
| N3-C4-C7   | 117.45   |
| C5-C4-C7   | 121.98   |
| H5-C5-C6   | 121.24   |
| H5-C5-C4   | 121.37   |
| C6-C5-C4   | 117.39   |
| H6-C6-N1   | 116.45   |
| H6-C6-C5   | 120.91   |
| N1-C6-C5   | 122.64   |
| H7c-C7-H7a | 108.97   |
| H7c-C7-H7b | 108.98   |

|            |        |
|------------|--------|
| H7c-C7-C4  | 109.74 |
| H7a-C7-H7b | 107.16 |
| H7a-C7-C4  | 110.95 |
| H7b-C7-C4  | 110.97 |

---

Table 63S. Computed atomic orthogonal coordinates for MePYM optimized at the DFT-B3LYP/6-31+G\*\* level.

| Atom | x        | y        | z        |
|------|----------|----------|----------|
| H7b  | -0.27723 | 0.04992  | -0.08783 |
| H7c  | -0.27311 | -0.10532 | -0.00079 |
| H6   | 0.18660  | 0.20014  | 0.00000  |
| H2   | 0.16129  | -0.21148 | 0.00000  |
| C7   | -0.23746 | -0.00220 | 0.00000  |
| H5   | -0.06425 | 0.21616  | 0.00000  |
| N1   | 0.18916  | -0.00684 | 0.00000  |
| C6   | 0.12451  | 0.11078  | 0.00000  |
| C2   | 0.11087  | -0.11512 | 0.00000  |
| C5   | -0.01423 | 0.11979  | 0.00000  |
| N3   | -0.02299 | -0.11836 | 0.00000  |
| C4   | -0.08692 | -0.00017 | 0.00000  |
| H7a  | -0.27717 | 0.04852  | 0.08867  |



Table 64S. Computed bond lengths (Å) and angles (°) for MePYM optimized at the DFT-B3LYP/6-31+G\*\* level.

| Vector     | Length |
|------------|--------|
| N1-C2      | 1.336  |
| N1-C6      | 1.342  |
| N3-C2      | 1.339  |
| N3-C4      | 1.344  |
| C4-C5      | 1.403  |
| C4-C7      | 1.506  |
| C5-C6      | 1.390  |
| H2-C2      | 1.088  |
| H5-C5      | 1.086  |
| H6-C6      | 1.088  |
| H7a-C7     | 1.096  |
| H7b-C7     | 1.096  |
| H7c-C7     | 1.091  |
| Vectors    | Angle  |
| C2-N1-C6   | 115.34 |
| C2-N3-C4   | 117.02 |
| H2-C2-N1   | 116.51 |
| H2-C2-N3   | 116.23 |
| N1-C2-N3   | 127.25 |
| N3-C4-C5   | 120.38 |
| N3-C4-C7   | 117.64 |
| C5-C4-C7   | 121.99 |
| H5-C5-C6   | 121.15 |
| H5-C5-C4   | 121.35 |
| C6-C5-C4   | 117.50 |
| H6-C6-N1   | 116.41 |
| H6-C6-C5   | 121.08 |
| N1-C6-C5   | 122.51 |
| H7c-C7-H7a | 108.96 |
| H7c-C7-H7b | 108.97 |
| H7c-C7-C4  | 109.84 |
| H7a-C7-H7b | 107.27 |

|           |        |
|-----------|--------|
| H7a-C7-C4 | 110.86 |
| H7b-C7-C4 | 110.88 |

---

**ISOLATE MOLECULES****Acetamide, N-methylacetamide, methylammonium, methylamine, N-methylguanidinium,  
methanol, 1-hydroxy-4-methylbenzene****AA**

Table 65S. Computed atomic orthogonal coordinates for AA optimized at the DFT-B3LYP/6-31+G\*\* level.

| Atom | x        | y        | z        |
|------|----------|----------|----------|
| N1   | -0.10393 | -0.08269 | -0.00002 |
| C2   | -0.00740 | 0.01432  | -0.00001 |
| C3   | 0.13646  | -0.03474 | 0.00000  |
| O4   | -0.03549 | 0.13359  | 0.00000  |
| H5   | -0.20072 | -0.05392 | 0.00007  |
| H6   | -0.08231 | -0.18104 | 0.00006  |
| H7   | 0.18711  | 0.00590  | -0.08798 |
| H8   | 0.14598  | -0.14368 | -0.00033 |
| H9   | 0.18691  | 0.00534  | 0.08836  |

Table 66S. Computed bond lengths (Å) and angles (°) for AA optimized at the DFT-B3LYP/6-31+G\*\* level.

| Vector | Length |
|--------|--------|
| N1-C2  | 1.369  |
| C2-O4  | 1.225  |
| C2-C3  | 1.520  |
| H5-N1  | 1.010  |
| H6-N1  | 1.007  |
| H7-C3  | 1.094  |
| H8-C3  | 1.094  |
| H9-C3  | 1.094  |

  

| Vectors  | Angle  |
|----------|--------|
| H6-N1-H5 | 118.95 |
| H6-N1-C2 | 122.74 |
| H5-N1-C2 | 118.30 |
| O4-C2-N1 | 121.89 |
| O4-C2-C3 | 122.08 |
| N1-C2-C3 | 116.03 |
| H7-C3-H8 | 109.12 |
| H7-C3-H9 | 107.47 |
| H7-C3-C2 | 108.57 |
| H8-C3-H9 | 109.11 |
| H8-C3-C2 | 113.82 |
| H9-C3-C2 | 108.57 |

Table 67S. Computed atomic orthogonal coordinates for AA optimized at the *ab initio*-MP2/6-31+G\*\* level.

---

| Atom | x        | y        | z        |
|------|----------|----------|----------|
| N1   | -0.10121 | -0.08567 | -0.00437 |
| C2   | -0.00732 | 0.01448  | -0.00092 |
| C3   | 0.13674  | -0.03174 | 0.00004  |
| O4   | -0.03913 | 0.13356  | 0.00069  |
| H5   | -0.19704 | -0.05891 | 0.01193  |
| H6   | -0.07545 | -0.18115 | 0.01403  |
| H7   | 0.19766  | 0.04403  | -0.04834 |
| H8   | 0.14969  | -0.12727 | -0.05058 |
| H9   | 0.17011  | -0.04195 | 0.10334  |

---

Table 68S. Computed bond lengths (Å) and angles (°) for AA optimized at the *ab initio*-MP2/6-31+G\*\* level.

| Vector | Length |
|--------|--------|
| N1-C2  | 1.373  |
| C2-O4  | 1.233  |
| C2-C3  | 1.513  |
| H5-N1  | 1.008  |
| H6-N1  | 1.006  |
| H7-C3  | 1.086  |
| H8-C3  | 1.089  |
| H9-C3  | 1.090  |

  

| Vectors  | Angle  |
|----------|--------|
| H6-N1-H5 | 117.76 |
| H6-N1-C2 | 120.83 |
| H5-N1-C2 | 116.89 |
| O4-C2-N1 | 121.90 |
| O4-C2-C3 | 122.73 |
| N1-C2-C3 | 115.36 |
| H7-C3-H8 | 109.77 |
| H7-C3-H9 | 108.40 |
| H7-C3-C2 | 108.55 |
| H8-C3-H9 | 108.78 |
| H8-C3-C2 | 112.23 |
| H9-C3-C2 | 109.03 |

## MAA

Table 69S. Computed atomic orthogonal coordinates for MAA optimized at the DFT-B3LYP/6-31+G\*\* level.

| Atom | x        | y        | z        |
|------|----------|----------|----------|
| H4a  | 0.25280  | -0.04168 | 0.08955  |
| H3a  | -0.23852 | -0.02616 | 0.08840  |
| H3b  | -0.17253 | -0.16576 | -0.00041 |
| H4b  | 0.19081  | 0.09861  | -0.00077 |
| C4   | 0.19806  | -0.01020 | 0.00000  |
| C3   | -0.18187 | -0.05675 | 0.00000  |
| H1   | 0.04997  | -0.16334 | 0.00000  |
| O5   | -0.04262 | 0.13912  | 0.00000  |
| N1   | 0.06266  | -0.06327 | 0.00000  |
| C2   | -0.04861 | 0.01642  | 0.00000  |
| H4c  | 0.25322  | -0.04296 | -0.08881 |
| H3c  | -0.23886 | -0.02550 | -0.08794 |

Table 70S. Computed bond lengths (Å) and angles (°) for MAA optimized at the DFT-B3LYP/6-31+G\*\* level.

| Vector     | Length |
|------------|--------|
| N1-C2      | 1.369  |
| N1-C4      | 1.454  |
| C2-O5      | 1.228  |
| C2-C3      | 1.520  |
| C4-H4b     | 1.091  |
| C4-H4c     | 1.096  |
| C4-H4a     | 1.096  |
| H1-N1      | 1.009  |
| H3a-C3     | 1.094  |
| H3b-C3     | 1.094  |
| H3c-C3     | 1.094  |
| H4a-C4     | 1.096  |
| H4b-C4     | 1.091  |
| H4c-C4     | 1.096  |
| Vectors    | Angle  |
| H1-N1-C2   | 118.38 |
| H1-N1-C4   | 118.63 |
| C2-N1-C4   | 122.99 |
| O5-C2-N1   | 122.81 |
| O5-C2-C3   | 121.57 |
| N1-C2-C3   | 115.62 |
| H3a-C3-H3c | 107.47 |
| H3a-C3-H3b | 109.02 |
| H3a-C3-C2  | 108.63 |
| H3c-C3-H3b | 109.04 |
| H3c-C3-C2  | 108.62 |
| H3b-C3-C2  | 113.87 |
| H4b-C4-H4c | 109.03 |
| H4b-C4-H4a | 109.00 |
| H4b-C4-N1  | 107.59 |
| H4c-C4-H4a | 108.97 |
| H4c-C4-N1  | 111.08 |



H4a-C4-N1

111.12

---

Table 71S. Computed atomic orthogonal coordinates for MAA optimized at the *ab initio*-MP2/6-31+G\*\* level.

| Atom | x        | y        | z        |
|------|----------|----------|----------|
| N1   | 0.06253  | -0.06379 | 0.00000  |
| C2   | -0.04854 | 0.01604  | 0.00000  |
| C3   | -0.18123 | -0.05679 | 0.00000  |
| C4   | 0.19736  | -0.00994 | 0.00000  |
| O5   | -0.04247 | 0.13958  | 0.00000  |
| H1   | 0.04978  | -0.16365 | 0.00001  |
| H3a  | -0.23760 | -0.02560 | -0.08771 |
| H3b  | -0.23715 | -0.02647 | 0.08831  |
| H3c  | -0.17094 | -0.16520 | -0.00055 |
| H4a  | 0.25204  | -0.04249 | -0.08843 |
| H4b  | 0.25151  | -0.04088 | 0.08935  |
| H4c  | 0.18882  | 0.09833  | -0.00099 |

Table 72S. Computed bond lengths (Å) and angles (°) for MAA optimized at the *ab initio*-MP2/6-31+G\*\* level.

| Vector     | Length |
|------------|--------|
| N1-C2      | 1.368  |
| N1-C4      | 1.452  |
| C2-O5      | 1.237  |
| C2-C3      | 1.514  |
| H1-N1      | 1.007  |
| H3a-C3     | 1.088  |
| H3b-C3     | 1.088  |
| H3c-C3     | 1.089  |
| H4a-C4     | 1.089  |
| H4b-C4     | 1.090  |
| H4c-C4     | 1.086  |
| Vectors    | Angle  |
| H1-N1-C2   | 118.43 |
| H1-N1-C4   | 119.05 |
| C2-N1-C4   | 122.52 |
| O5-C2-N1   | 122.89 |
| O5-C2-C3   | 121.57 |
| N1-C2-C3   | 115.53 |
| H3a-C3-H3b | 107.94 |
| H3a-C3-H3c | 109.28 |
| H3a-C3-C2  | 108.43 |
| H3b-C3-H3c | 109.27 |
| H3b-C3-C2  | 108.44 |
| H3c-C3-C2  | 113.34 |
| H4c-C4-H4a | 109.26 |
| H4c-C4-H4b | 109.25 |
| H4c-C4-N1  | 107.26 |
| H4a-C4-H4b | 109.35 |
| H4a-C4-N1  | 110.81 |
| H4b-C4-N1  | 110.87 |

## MA

Table 73S. Computed atomic orthogonal coordinates for MA optimized at the DFT-B3LYP/6-31+G\*\* level.

| Atom | x        | y        | z        |
|------|----------|----------|----------|
| H6   | 0.11446  | -0.03019 | 0.09896  |
| H3   | -0.10892 | 0.06510  | 0.06985  |
| H5   | -0.10891 | -0.09304 | 0.02144  |
| C2   | 0.08034  | 0.00000  | 0.00000  |
| N1   | -0.07125 | 0.00000  | 0.00000  |
| H7   | 0.11450  | 0.10079  | -0.02333 |
| H8   | 0.11447  | -0.07061 | -0.07561 |
| H4   | -0.10888 | 0.02795  | -0.09131 |

Table 74S. Computed bond lengths (Å) and angles (°) for MA optimized at the DFT-B3LYP/6-31+G\*\* level.

| Vector | Length |
|--------|--------|
| N1-C2  | 1.516  |
| H3-N1  | 1.026  |
| H4-N1  | 1.026  |
| H5-N1  | 1.026  |
| H6-C2  | 1.089  |
| H7-C2  | 1.089  |
| H8-C2  | 1.089  |

  

| Vectors  | Angle  |
|----------|--------|
| H3-N1-H4 | 107.35 |
| H3-N1-H5 | 107.34 |
| H3-N1-C2 | 111.53 |
| H4-N1-H5 | 107.35 |
| H4-N1-C2 | 111.51 |
| H5-N1-C2 | 111.53 |
| H6-C2-H8 | 110.65 |
| H6-C2-H7 | 110.65 |
| H6-C2-N1 | 108.25 |
| H8-C2-H7 | 110.66 |
| H8-C2-N1 | 108.26 |
| H7-C2-N1 | 108.27 |

Table 75S. Computed atomic orthogonal coordinates for MA optimized at the *ab initio*-MP2/6-31+G\*\* level.

| Atom | x        | y        | z        |
|------|----------|----------|----------|
| N1   | 0.07076  | 0.00000  | 0.00000  |
| C2   | -0.07991 | 0.00000  | 0.00000  |
| H3   | 0.10839  | 0.07144  | 0.06285  |
| H4   | 0.10838  | -0.09017 | 0.03040  |
| H5   | 0.10834  | 0.01876  | -0.09330 |
| H6   | -0.11365 | 0.09765  | -0.03278 |
| H7   | -0.11366 | -0.02044 | 0.10096  |
| H8   | -0.11365 | -0.07721 | -0.06820 |

Table 76S. Computed bond lengths (Å) and angles (°) for MA optimized at the *ab initio*-MP2/6-31+G\*\* level.

| Vector | Length |
|--------|--------|
| N1-C2  | 1.507  |
| H3-N1  | 1.023  |
| H4-N1  | 1.023  |
| H5-N1  | 1.023  |
| H6-C2  | 1.084  |
| H7-C2  | 1.084  |
| H8-C2  | 1.084  |

  

| Vectors  | Angle  |
|----------|--------|
| H3-N1-H4 | 107.31 |
| H3-N1-H5 | 107.28 |
| H3-N1-C2 | 111.58 |
| H4-N1-H5 | 107.30 |
| H4-N1-C2 | 111.57 |
| H5-N1-C2 | 111.55 |
| H6-C2-H7 | 110.77 |
| H6-C2-H8 | 110.76 |
| H6-C2-N1 | 108.14 |
| H7-C2-H8 | 110.78 |
| H7-C2-N1 | 108.14 |
| H8-C2-N1 | 108.13 |

**MAB**

Table 77S. Computed atomic orthogonal coordinates for MAB optimized at the DFT-B3LYP/6-31+G\*\* level.

| Atom | x        | y        | z        |
|------|----------|----------|----------|
| N1   | -0.07506 | 0.00000  | -0.01183 |
| C2   | 0.07096  | 0.00000  | 0.00176  |
| H3   | -0.11603 | 0.08181  | 0.03229  |
| H4   | -0.11604 | -0.08180 | 0.03231  |
| H5   | 0.10852  | -0.00017 | 0.10538  |
| H6   | 0.11163  | -0.08802 | -0.04902 |
| H7   | 0.11157  | 0.08823  | -0.04870 |



Table 78S. Computed bond lengths (Å) and angles (°) for MAB optimized at the DFT-B3LYP/6-31+G\*\* level.

| Vector | Length |
|--------|--------|
| N1-C2  | 1.467  |
| H3-N1  | 1.016  |
| H4-N1  | 1.016  |
| H5-C2  | 1.095  |
| H6-C2  | 1.095  |
| H7-C2  | 1.102  |

  

| Vectors   | Angle  |
|-----------|--------|
| H3-N1-H4  | 107.28 |
| H3-N1-C2  | 111.18 |
| H4-N1-C2  | 111.19 |
| H5-C2-H6  | 107.25 |
| H5-C2-H2c | 107.96 |
| H5-C2-N1  | 109.09 |
| H6-C2-H7  | 107.95 |
| H6-C2-N1  | 109.07 |
| H7-C2-N1  | 115.24 |

Table 79S. Computed atomic orthogonal coordinates for MAB optimized at the *ab initio*-MP2/6-31+G\*\* level.

| Atom | x        | y        | z        |
|------|----------|----------|----------|
| N1   | -0.07489 | 0.00000  | -0.01191 |
| C2   | 0.07092  | 0.00000  | 0.00175  |
| H3   | -0.11529 | -0.08154 | 0.03259  |
| H4   | -0.11530 | 0.08154  | 0.03258  |
| H5   | 0.11084  | -0.08776 | -0.04874 |
| H6   | 0.10772  | -0.00015 | 0.10487  |
| H7   | 0.11077  | 0.08795  | -0.04845 |

Table 80S. Computed bond lengths (Å) and angles (°) for MAB optimized at the *ab initio*-MP2/6-31+G\*\* level.

| Vector | Length |
|--------|--------|
| N1-C2  | 1.464  |
| H3-N1  | 1.013  |
| H4-N1  | 1.013  |
| H5-C2  | 1.088  |
| H6-C2  | 1.095  |
| H7-C2  | 1.088  |

  

| Vectors  | Angle  |
|----------|--------|
| H3-N1-H4 | 107.21 |
| H3-N1-C2 | 110.86 |
| H4-N1-C2 | 110.87 |
| H5-C2-H7 | 107.66 |
| H5-C2-H6 | 108.21 |
| H5-C2-N1 | 108.78 |
| H7-C2-H6 | 108.21 |
| H7-C2-N1 | 108.76 |
| H6-C2-N1 | 114.99 |

## MGU

Table 81S. Computed atomic orthogonal coordinates for MGU optimized at the DFT-B3LYP/6-31+G\*\* level.

| Atom | x        | y        | z        |
|------|----------|----------|----------|
| H5b  | -0.22280 | 0.05058  | -0.08612 |
| H4   | -0.06056 | -0.16609 | -0.02405 |
| H3b  | -0.02994 | 0.18709  | -0.02041 |
| H2a  | 0.25592  | -0.02216 | -0.01296 |
| N4   | -0.06439 | -0.06674 | -0.00564 |
| C5   | -0.19701 | -0.00466 | 0.00484  |
| N3   | 0.05320  | 0.13329  | -0.00111 |
| H5a  | -0.27024 | -0.08415 | 0.01856  |
| N2   | 0.16751  | -0.06820 | 0.00305  |
| C1   | 0.05150  | -0.00065 | -0.00166 |
| H3a  | 0.13793  | 0.18461  | 0.01839  |
| H2b  | 0.16996  | -0.16747 | 0.02135  |
| H5c  | -0.20149 | 0.06110  | 0.09206  |

Table 82S. Computed bond lengths (Å) and angles (°) for MGU optimized at the DFT-B3LYP/6-31+G\*\* level.

| Vector     | Length |
|------------|--------|
| C1-N2      | 1.343  |
| C1-N3      | 1.340  |
| C1-N4      | 1.335  |
| C5-N4      | 1.468  |
| N2-H2a     | 1.010  |
| N2-H2b     | 1.010  |
| N3-H3a     | 1.010  |
| N3-H3b     | 1.009  |
| N4-H4      | 1.011  |
| C5-H5a     | 1.089  |
| C5-H5b     | 1.095  |
| C5-H5c     | 1.093  |
| Vectors    | Angle  |
| N4-C1-N3   | 120.42 |
| N4-C1-N2   | 120.13 |
| N3-C1-N2   | 119.45 |
| H5a-C5-H5c | 108.11 |
| H5a-C5-H5b | 108.32 |
| H5a-C5-C1  | 134.50 |
| H5a-C5-N4  | 107.92 |
| H5c-C5-H5b | 110.46 |
| H5c-C5-N4  | 110.39 |
| H5b-C5-N4  | 111.52 |
| H2a-N2-H2b | 117.12 |
| H2a-N2-C1  | 121.43 |
| H2b-N2-C1  | 121.45 |
| H3b-N3-H3a | 117.22 |
| H3b-N3-C1  | 121.46 |
| H3a-N3-C1  | 121.31 |
| H4-N4-C1   | 117.33 |
| H4-N4-C5   | 117.56 |
| C1-N4-C5   | 124.95 |

Table 83S. Computed atomic orthogonal coordinates for MGU optimized at the MP2/6-31+G\*\* level.

| Atom | x        | y        | z        |
|------|----------|----------|----------|
| C1   | 0.05115  | -0.00076 | -0.00259 |
| N2   | 0.16736  | -0.06750 | 0.00454  |
| N3   | 0.05206  | 0.13307  | -0.00119 |
| N4   | -0.06421 | -0.06714 | -0.00801 |
| C5   | -0.19599 | -0.00480 | 0.00679  |
| H2a  | 0.25469  | -0.02245 | -0.01770 |
| H2b  | 0.16993  | -0.16546 | 0.02791  |
| H3a  | 0.13520  | 0.18405  | 0.02420  |
| H3b  | -0.02879 | 0.18634  | -0.02893 |
| H4   | -0.06018 | -0.16520 | -0.03183 |
| H5a  | -0.26837 | -0.08410 | 0.02212  |
| H5b  | -0.22367 | 0.05110  | -0.08251 |
| H5c  | -0.19625 | 0.06001  | 0.09415  |

Table 84S. Computed bond lengths (Å) and angles (°) for MGU optimized at the MP2/6-31+G\*\* level.

| Vector     | Length |
|------------|--------|
| C1-N2      | 1.342  |
| C1-N3      | 1.338  |
| C1-N4      | 1.332  |
| N4-C5      | 1.465  |
| H2a-N2     | 1.008  |
| H2b-N2     | 1.007  |
| H3a-N3     | 1.008  |
| H3b-N3     | 1.007  |
| H4-N4      | 1.010  |
| H5a-C5     | 1.085  |
| H5b-C5     | 1.089  |
| H5c-C5     | 1.088  |
| Vectors    | Angle  |
| N4-C1-N3   | 120.31 |
| N4-C1-N2   | 120.28 |
| N3-C1-N2   | 119.40 |
| H5a-C5-H5c | 108.70 |
| H5a-C5-H5b | 108.75 |
| H5a-C5-N4  | 107.66 |
| H5c-C5-H5b | 110.61 |
| H5c-C5-N4  | 109.68 |
| H5b-C5-N4  | 111.35 |
| H2a-N2-H2b | 117.64 |
| H2a-N2-C1  | 121.10 |
| H2b-N2-C1  | 121.20 |
| H3b-N3-H3a | 117.65 |
| H3b-N3-C1  | 121.37 |
| H3a-N3-C1  | 120.94 |
| H4-N4-C1   | 117.32 |
| H4-N4-C5   | 118.22 |
| C1-N4-C5   | 124.25 |

## MeOH

Table 85S. Computed atomic orthogonal coordinates for MeOH optimized at the DFT-B3LYP/6-31+G\*\* level.

| Atom | x        | Y        | z        |
|------|----------|----------|----------|
| O1   | 0.07497  | 0.01224  | 0.00000  |
| C2   | -0.06682 | -0.00207 | 0.00000  |
| H1   | 0.11543  | -0.07538 | 0.00005  |
| H2a  | -0.10824 | 0.09899  | -0.00056 |
| H2b  | -0.10306 | -0.05404 | 0.08976  |
| H2c  | -0.10299 | -0.05506 | -0.08919 |

Table 86S. Computed bond lengths (Å) and angles (°) for MeOH optimized at the DFT-B3LYP/6-31+G\*\* level.

| Vector   | Length |
|----------|--------|
| O1-C2    | 1.425  |
| H1-O1    | 0.965  |
| H2a-C2   | 1.092  |
| H2b-C2   | 1.099  |
| H2c-C2   | 1.099  |
| H1-O1-C2 | 109.02 |

  

| Vectors    | Angle  |
|------------|--------|
| H2a-C2-H2b | 108.47 |
| H2a-C2-H2c | 108.50 |
| H2a-C2-O1  | 106.52 |
| H2b-C2-H2c | 109.06 |
| H2b-C2-O1  | 112.07 |
| H2c-C2-O1  | 112.08 |



Table 87S. Computed atomic orthogonal coordinates for MeOH optimized at the *ab initio*-MP2/6-31+G\*\* level.

| Atom | x        | Y        | z        |
|------|----------|----------|----------|
| O1   | 0.07508  | 0.01223  | 0.00000  |
| C2   | -0.06713 | -0.00203 | 0.00000  |
| H1   | 0.11460  | -0.07573 | 0.00003  |
| H2a  | -0.10751 | 0.09875  | -0.00034 |
| H2b  | -0.10246 | -0.05464 | -0.08888 |
| H2c  | -0.10248 | -0.05402 | 0.08923  |

Table 88S. Computed bond lengths (Å) and angles (°) for MeOH optimized at the *ab initio*-MP2/6-31+G\*\* level.

| Vector   | Length |
|----------|--------|
| O1-C2    | 1.429  |
| H1-O1    | 0.964  |
| H2a-C2   | 1.086  |
| H2b-C2   | 1.092  |
| H2c-C2   | 1.092  |
| H1-O1-C2 | 108.47 |

  

| Vectors    | Angle  |
|------------|--------|
| H2a-C2-H2b | 108.93 |
| H2a-C2-H2c | 108.92 |
| H2a-C2-O1  | 106.11 |
| H2b-C2-H2c | 109.34 |
| H2b-C2-O1  | 111.72 |
| H2c-C2-O1  | 111.70 |

**HMB**

Table 89S. Computed atomic orthogonal coordinates for HMB optimized at the DFT-B3LYP/6-31+G\*\* level.

| Atom | x        | y        | z        |
|------|----------|----------|----------|
| O1   | -0.28134 | -0.00949 | 0.00011  |
| C2   | -0.14418 | -0.00175 | 0.00004  |
| C3   | -0.07283 | -0.12210 | -0.00003 |
| C4   | 0.06647  | -0.11970 | -0.00011 |
| C5   | 0.13831  | 0.00105  | -0.00012 |
| C6   | 0.06472  | 0.12007  | -0.00011 |
| C7   | -0.07517 | 0.11965  | -0.00002 |
| C8   | 0.28954  | 0.00157  | 0.00015  |
| H1   | -0.31926 | 0.07935  | 0.00000  |
| H3   | -0.12747 | -0.21587 | -0.00005 |
| H4   | 0.12059  | -0.21404 | -0.00018 |
| H6   | 0.11698  | 0.21541  | -0.00018 |
| H7   | -0.12988 | 0.21371  | -0.00004 |
| H8a  | 0.33007  | -0.05228 | -0.08633 |
| H8b  | 0.32970  | -0.04671 | 0.09005  |
| H8c  | 0.32881  | 0.10363  | -0.00295 |

Table 90S. Computed bond lengths (Å) and angles (°) for HMB optimized at the DFT-B3LYP/6-31+G\*\* level.

| Vector | Length |
|--------|--------|
| O1-C2  | 1.374  |
| C2-C7  | 1.396  |
| C2-C3  | 1.399  |
| C3-C4  | 1.393  |
| C4-C5  | 1.405  |
| C5-C6  | 1.399  |
| C5-C8  | 1.512  |
| C6-C7  | 1.399  |
| H1-O1  | 0.966  |
| H3-C3  | 1.085  |
| H4-C4  | 1.088  |
| H6-C6  | 1.087  |
| H7-C7  | 1.088  |
| H8a-C8 | 1.096  |
| H8b-C8 | 1.097  |
| H8c-C8 | 1.094  |

  

| Vectors  | Angle  |
|----------|--------|
| H1-O1-C2 | 109.88 |
| O1-C2-C7 | 122.85 |
| O1-C2-C3 | 117.43 |
| C7-C2-C3 | 119.72 |
| H3-C3-C4 | 121.22 |
| H3-C3-C2 | 119.11 |
| C4-C3-C2 | 119.67 |
| H4-C4-C3 | 118.85 |
| H4-C4-C5 | 119.41 |
| C3-C4-C5 | 121.74 |
| C6-C5-C4 | 117.52 |
| C6-C5-C8 | 121.53 |
| C4-C5-C8 | 120.95 |
| H6-C6-C7 | 118.90 |
| H6-C6-C5 | 119.54 |

|            |        |
|------------|--------|
| C7-C6-C5   | 121.56 |
| H7-C7-C2   | 120.20 |
| H7-C7-C6   | 120.01 |
| C2-C7-C6   | 119.79 |
| H8c-C8-H8a | 107.65 |
| H8c-C8-H8b | 107.61 |
| H8c-C8-C5  | 111.23 |
| H8a-C8-H8b | 107.16 |
| H8a-C8-C5  | 111.50 |
| H8b-C8-C5  | 111.48 |

---

Table 91S. Computed atomic orthogonal coordinates for HMB optimized at the *ab initio* MP2/6-31+G\*\* level.

| Atom | x        | y        | z        |
|------|----------|----------|----------|
| O1   | -0.28141 | -0.00951 | 0.00106  |
| C2   | -0.14366 | -0.00151 | 0.00065  |
| C3   | -0.07300 | -0.12205 | -0.00061 |
| C4   | 0.06651  | -0.12000 | -0.00087 |
| C5   | 0.13821  | 0.00065  | -0.00181 |
| C6   | 0.06518  | 0.12014  | -0.00086 |
| C7   | -0.07469 | 0.12000  | -0.00071 |
| C8   | 0.28887  | 0.00142  | 0.00184  |
| H1   | -0.31825 | 0.07987  | 0.00222  |
| H3   | -0.12800 | -0.21530 | -0.00034 |
| H4   | 0.12045  | -0.21412 | -0.00188 |
| H6   | 0.11765  | 0.21508  | -0.00190 |
| H7   | -0.12923 | 0.21383  | -0.00058 |
| H8a  | 0.32952  | -0.08419 | -0.05204 |
| H8b  | 0.32614  | -0.00305 | 0.10436  |
| H8c  | 0.32847  | 0.09202  | -0.04406 |

Table 92S. Computed bond lengths (Å) and angles (°) for HMB optimized at the *ab initio* MP2/6-31+G\*\* level.

| Vector | Length |
|--------|--------|
| O1-C2  | 1.380  |
| C2-C3  | 1.397  |
| C2-C7  | 1.397  |
| C3-C4  | 1.395  |
| C4-C5  | 1.404  |
| C5-C6  | 1.400  |
| C5-C8  | 1.507  |
| C6-C7  | 1.399  |
| H1-O1  | 0.967  |
| H3-C3  | 1.083  |
| H4-C4  | 1.085  |
| H6-C6  | 1.085  |
| H7-C7  | 1.085  |
| H8a-C8 | 1.090  |
| H8b-C8 | 1.092  |
| H8c-C8 | 1.090  |

  

| Vectors  | Angle  |
|----------|--------|
| H1-O1-C2 | 109.08 |
| O1-C2-C3 | 117.06 |
| O1-C2-C7 | 122.90 |
| C3-C2-C7 | 120.03 |
| H3-C3-C4 | 121.37 |
| H3-C3-C2 | 119.09 |
| C4-C3-C2 | 119.54 |
| H4-C4-C3 | 118.97 |
| H4-C4-C5 | 119.45 |
| C3-C4-C5 | 121.56 |
| C6-C5-C4 | 117.84 |
| C6-C5-C8 | 121.12 |
| C4-C5-C8 | 120.99 |
| H6-C6-C7 | 118.98 |
| H6-C6-C5 | 119.63 |
| C7-C6-C5 | 121.37 |

---

|            |        |
|------------|--------|
| H7-C7-C2   | 120.25 |
| H7-C7-C6   | 120.11 |
| C2-C7-C6   | 119.64 |
| H8a-C8-H8c | 108.01 |
| H8a-C8-H8b | 107.74 |
| H8a-C8-C5  | 110.90 |
| H8c-C8-H8b | 107.78 |
| H8c-C8-C5  | 110.93 |
| H8b-C8-C5  | 111.33 |

---

**ISOLATE MOLECULES**  
**Solvent effect on the structure of selected molecules**

**HF**

Table 93S. Computed atomic orthogonal coordinates for HF optimized at the DFT-B3LYP/6-31G\*\* level with solvent treatment via PCM method (water).

| Atom | x       | y       | z        |
|------|---------|---------|----------|
| F1   | 0.00000 | 0.00000 | 0.00939  |
| H1   | 0.00000 | 0.00000 | -0.08450 |

Table 94S. Computed bond lengths (Å) and angles (°) for HCl optimized at the DFT-B3LYP/6-31G\*\* level, with solvent treatment via PCM method (water).

| Vector | Length |
|--------|--------|
| F1-H1  | 0.939  |



**HCl**

Table 95S. Computed atomic orthogonal coordinates for HCl optimized at the DFT-B3LYP/6-31G\*\* level with solvent treatment via PCM method (water).

| Atom | x       | y       | z        |
|------|---------|---------|----------|
| C11  | 0.00000 | 0.00000 | 0.00718  |
| H2   | 0.00000 | 0.00000 | -0.12214 |

Table 96S. Computed bond lengths (Å) and angles (°) for HCl optimized at the DFT-B3LYP/6-31G\*\* level, with solvent treatment via PCM method (water).

| Vector | Length |
|--------|--------|
| C11-H2 | 1.293  |

Table 97S. Computed atomic orthogonal coordinates for HCl optimized at the DFT-B3LYP/6-31G\*\* level with solvent treatment via PCM method (water).

| Atom | x       | y       | z        |
|------|---------|---------|----------|
| C11  | 0.00000 | 0.00000 | 0.00719  |
| H2   | 0.00000 | 0.00000 | -0.12225 |

Table 98S. Computed bond lengths (Å) and angles (°) for HCl optimized at the DFT-B3LYP/6-31+G\*\* level, with solvent treatment via PCM method (water).

| Vector | Length |
|--------|--------|
| C11-H2 | 1.274  |

**IM**

Table 99S. Computed atomic orthogonal coordinates for IM optimized at the DFT-B3LYP/6-31G\*\* level, with solvent treatment via PCM method (water).

---

| Atom | x        | y        | z       |
|------|----------|----------|---------|
| H5   | 0.21329  | 0.07034  | 0.00000 |
| H4   | 0.12152  | -0.19149 | 0.00000 |
| H2   | -0.21038 | 0.06774  | 0.00000 |
| H1   | -0.00038 | 0.21231  | 0.00000 |
| C5   | 0.11195  | 0.02986  | 0.00000 |
| N3   | -0.07473 | -0.09877 | 0.00000 |
| N1   | 0.00000  | 0.11039  | 0.00000 |
| C4   | 0.06378  | -0.09882 | 0.00000 |
| C2   | -0.10922 | 0.02893  | 0.00000 |

---

Table 100S. Computed bond lengths (Å) and angles (°) for IM optimized at the DFT-B3LYP/6-31G\*\* level, with solvent treatment via PCM method (water).

| Vector | Length |
|--------|--------|
| N1-C2  | 1.363  |
| N1-C5  | 1.379  |
| N3-C2  | 1.323  |
| N3-C4  | 1.385  |
| C4-C5  | 1.374  |
| H1-N1  | 1.019  |
| H2-C2  | 1.083  |
| H4-C4  | 1.092  |
| H5-C5  | 1.091  |

  

| Vectors  | Angle  |
|----------|--------|
| H1-N1-C2 | 126.50 |
| H1-N1-C5 | 125.94 |
| C2-N1-C5 | 107.55 |
| C2-N3-C4 | 105.13 |
| H2-C2-N3 | 126.10 |
| H2-C2-N1 | 122.29 |
| N3-C2-N1 | 111.60 |
| H4-C4-C5 | 127.55 |
| H4-C4-N3 | 121.95 |
| C5-C4-N3 | 110.50 |
| H5-C5-C4 | 132.30 |
| H5-C5-N1 | 122.50 |
| C4-C5-N1 | 105.21 |

Table 101. Computed atomic orthogonal coordinates for IM optimized at the DFT-B3LYP/6-31+G\*\* level, with solvent treatment via PCM method (water).

---

| Atom | x        | y        | z       |
|------|----------|----------|---------|
| N1   | 0.00000  | 0.11044  | 0.00000 |
| C2   | -0.10912 | 0.02900  | 0.00000 |
| N3   | -0.07447 | -0.09886 | 0.00000 |
| C4   | 0.06387  | -0.09897 | 0.00000 |
| C5   | 0.11189  | 0.02993  | 0.00000 |
| H1   | -0.00103 | 0.21256  | 0.00000 |
| H2   | -0.21043 | 0.06745  | 0.00000 |
| H4   | 0.12065  | -0.19126 | 0.00000 |
| H5   | 0.21230  | 0.07040  | 0.00000 |

---

Table 102S. Computed bond lengths (Å) and angles (°) for IM optimized at the DFT-B3LYP/6-31+G\*\* level, with solvent treatment via PCM method (water).

| Vector   | Length |
|----------|--------|
| N1-C2    | 1.362  |
| N1-C5    | 1.378  |
| N3-C2    | 1.325  |
| N3-C4    | 1.383  |
| C4-C5    | 1.376  |
| H1-N1    | 1.021  |
| H2-C2    | 1.084  |
| H4-C4    | 1.084  |
| H5-C5    | 1.083  |
| Vectors  | Angle  |
| H1-N1-C2 | 126.16 |
| H1-N1-C5 | 126.31 |
| C2-N1-C5 | 107.53 |
| C2-N3-C4 | 105.21 |
| H2-C2-N3 | 125.95 |
| H2-C2-N1 | 122.48 |
| N3-C2-N1 | 111.57 |
| H4-C4-C5 | 127.97 |
| H4-C4-N3 | 121.65 |
| C5-C4-N3 | 110.39 |
| H5-C5-C4 | 132.38 |
| H5-C5-N1 | 122.31 |
| C4-C5-N1 | 105.30 |

Table 103S. Computed atomic orthogonal coordinates for IM optimized at the DFT-B3LYP/6-31+G\*\* level, with solvent treatment via PCM method (Methanol).

| Atom | x        | Y        | z       |
|------|----------|----------|---------|
| N1   | 0.00000  | 0.11045  | 0.00000 |
| C2   | -0.10915 | 0.02900  | 0.00000 |
| N3   | -0.07449 | -0.09885 | 0.00000 |
| C4   | 0.06388  | -0.09898 | 0.00000 |
| C5   | 0.11193  | 0.02993  | 0.00000 |
| H1   | -0.00106 | 0.21254  | 0.00000 |
| H2   | -0.21047 | 0.06742  | 0.00000 |
| H4   | 0.12064  | -0.19128 | 0.00000 |
| H5   | 0.21235  | 0.07038  | 0.00000 |

Table 104S. Computed bond lengths (Å) and angles (°) for IM optimized at the DFT-B3LYP/6-31+G\*\* level, with solvent treatment via PCM method (Methanol).

| Vector | Length |
|--------|--------|
| N1-C2  | 1.362  |
| N1-C5  | 1.379  |
| N3-C2  | 1.325  |
| N3-C4  | 1.384  |
| C4-C5  | 1.376  |
| H1-N1  | 1.021  |
| H2-C2  | 1.084  |
| H4-C4  | 1.084  |
| H5-C5  | 1.083  |

  

| Vectors  | Angle  |
|----------|--------|
| H1-N1-C2 | 126.14 |
| H1-N1-C5 | 126.33 |
| C2-N1-C5 | 107.54 |
| C2-N3-C4 | 105.22 |
| H2-C2-N3 | 125.93 |
| H2-C2-N1 | 122.50 |
| N3-C2-N1 | 111.56 |
| H4-C4-C5 | 127.97 |
| H4-C4-N3 | 121.64 |
| C5-C4-N3 | 110.39 |
| H5-C5-C4 | 132.38 |
| H5-C5-N1 | 122.33 |
| C4-C5-N1 | 105.29 |



**PYM**

Table 105S. Computed atomic orthogonal coordinates for PYM optimized at the DFT-B3LYP/6-31+G\*\* level, with solvent treatment via PCM method (water).

| Atom | x        | y        | z       |
|------|----------|----------|---------|
| N1   | -0.11926 | 0.07184  | 0.00000 |
| C2   | 0.00000  | 0.13247  | 0.00000 |
| N3   | 0.11938  | 0.07168  | 0.00000 |
| C4   | 0.11874  | -0.06291 | 0.00000 |
| C5   | -0.00008 | -0.13623 | 0.00000 |
| C6   | -0.11878 | -0.06280 | 0.00000 |
| H2   | 0.00012  | 0.24199  | 0.00000 |
| H4   | 0.21692  | -0.11203 | 0.00000 |
| H5   | -0.00015 | -0.24596 | 0.00000 |
| H6   | -0.21703 | -0.11178 | 0.00000 |

Table 106S. Computed bond lengths (Å) and angles (°) for PYM optimized at the DFT-B3LYP/6-31+G\*\* level, with solvent treatment via PCM method (water).

| Vector   | Length |
|----------|--------|
| N1-C2    | 1.338  |
| N1-C6    | 1.346  |
| N3-C2    | 1.340  |
| N3-C4    | 1.346  |
| C4-C5    | 1.396  |
| C5-C6    | 1.396  |
| H2-C2    | 1.095  |
| H4-C4    | 1.098  |
| H5-C5    | 1.097  |
| H6-C6    | 1.098  |
| Vectors  | Angle  |
| C2-N1-C6 | 116.74 |
| C2-N3-C4 | 116.71 |
| H2-C2-N1 | 117.01 |
| H2-C2-N3 | 116.92 |
| N1-C2-N3 | 126.07 |
| H4-C4-N3 | 116.31 |
| H4-C4-C5 | 121.74 |
| N3-C4-C5 | 121.95 |
| H5-C5-C4 | 121.71 |
| H5-C5-C6 | 121.71 |
| C6-C5-C4 | 116.58 |
| H6-C6-N1 | 116.29 |
| H6-C6-C5 | 121.76 |
| N1-C6-C5 | 121.95 |

## MAA

Table 107S. Computed atomic orthogonal coordinates for MAA optimized at the DFT-B3LYP/6-31+G\*\* level, with solvent treatment via PCM method (water).

| Atom | x        | y        | z        |
|------|----------|----------|----------|
| N1   | -0.06073 | -0.06419 | -0.00004 |
| C2   | 0.04786  | 0.01535  | -0.00003 |
| C3   | 0.18226  | -0.05460 | -0.00007 |
| C4   | -0.19622 | -0.01052 | 0.00000  |
| O5   | 0.03923  | 0.13950  | 0.00002  |
| H1   | -0.04921 | -0.16617 | -0.00008 |
| H3a  | 0.23657  | -0.02782 | 0.09120  |
| H3b  | 0.24114  | -0.01878 | -0.08516 |
| H3c  | 0.17381  | -0.16350 | -0.00556 |
| H4a  | -0.26638 | -0.09409 | 0.00506  |
| H4b  | -0.21587 | 0.04732  | -0.09104 |
| H4c  | -0.21220 | 0.05496  | 0.08631  |

Table 108S. Computed bond lengths (Å) and angles (°) for MAA optimized at the DFT-B3LYP/6-31+G\*\* level, with solvent treatment via PCM method (water).

| Vector     | Length |
|------------|--------|
| N1-C2      | 1.346  |
| N1-C4      | 1.457  |
| C2-O5      | 1.244  |
| C2-C3      | 1.515  |
| H1-N1      | 1.026  |
| H3a-C3     | 1.095  |
| H3b-C3     | 1.095  |
| H3c-C3     | 1.094  |
| H4a-C4     | 1.092  |
| H4b-C4     | 1.096  |
| H4c-C4     | 1.095  |
| Vectors    | Angle  |
| H1-N1-C2   | 119.78 |
| H1-N1-C4   | 118.05 |
| C2-N1-C4   | 122.17 |
| O5-C2-N1   | 122.25 |
| O5-C2-C3   | 121.47 |
| N1-C2-C3   | 116.28 |
| H3c-C3-H3b | 109.16 |
| H3c-C3-H3a | 108.88 |
| H3c-C3-C2  | 113.03 |
| H3b-C3-H3a | 107.51 |
| H3b-C3-C2  | 109.04 |
| H3a-C3-C2  | 109.07 |
| H4a-C4-H4c | 109.10 |
| H4a-C4-H4b | 109.08 |
| H4a-C4-N1  | 108.39 |
| H4c-C4-H4b | 108.23 |
| H4c-C4-N1  | 110.86 |
| H4b-C4-N1  | 111.14 |

**MA**

Table 109S. Computed atomic orthogonal coordinates for MA optimized at the DFT-B3LYP/6-31+G\*\* level, with solvent treatment via PCM method (water).

| Atom | x        | y        | z        |
|------|----------|----------|----------|
| N1   | 0.07030  | -0.00005 | -0.00002 |
| C2   | -0.07935 | -0.00002 | -0.00003 |
| H3   | 0.10881  | -0.09300 | 0.02314  |
| H4   | 0.10855  | 0.02684  | -0.09213 |
| H5   | 0.10802  | 0.06673  | 0.06921  |
| H6   | -0.11370 | -0.03016 | 0.09901  |
| H7   | -0.11392 | -0.07069 | -0.07557 |
| H8   | -0.11378 | 0.10080  | -0.02331 |

Table 110S. Computed bond lengths (Å) and angles (°) for MA optimized at the DFT-B3LYP/6-31+G\*\* level, with solvent treatment via PCM method (water).

| Vector | Length |
|--------|--------|
| N1-C2  | 1.497  |
| H3-N1  | 1.032  |
| H4-N1  | 1.033  |
| H5-N1  | 1.033  |
| H6-C2  | 1.091  |
| H7-C2  | 1.091  |
| H8-C2  | 1.091  |

  

| Vectors  | Angle  |
|----------|--------|
| H3-N1-H4 | 107.23 |
| H3-N1-H5 | 107.18 |
| H3-N1-C2 | 111.91 |
| H4-N1-H5 | 107.10 |
| H4-N1-C2 | 111.73 |
| H5-N1-C2 | 111.41 |
| H8-C2-H6 | 110.48 |
| H8-C2-H7 | 110.56 |
| H8-C2-N1 | 108.42 |
| H6-C2-H7 | 110.49 |
| H6-C2-N1 | 108.35 |
| H7-C2-N1 | 108.47 |

## MGU

Table 111S. Computed atomic orthogonal coordinates for MGU optimized at the DFT-B3LYP/6-31+G\*\* level, with solvent treatment via PCM method (water).

| Atom | x        | y        | z        |
|------|----------|----------|----------|
| C1   | -0.05083 | -0.00041 | 0.00077  |
| N2   | -0.16658 | -0.06881 | -0.00424 |
| N3   | -0.05367 | 0.13335  | 0.00005  |
| N4   | 0.06459  | -0.06730 | 0.00097  |
| C5   | 0.19602  | -0.00384 | 0.00049  |
| H2a  | -0.25517 | -0.02025 | 0.00930  |
| H2b  | -0.16539 | -0.16942 | 0.01271  |
| H3a  | -0.14298 | 0.18218  | 0.00615  |
| H3b  | 0.03070  | 0.18974  | -0.00799 |
| H4   | 0.05947  | -0.17008 | -0.00635 |
| H5a  | 0.27104  | -0.08311 | -0.00003 |
| H5b  | 0.21064  | 0.05768  | 0.09007  |
| H5c  | 0.21024  | 0.05807  | -0.08890 |

Table 112S. Computed bond lengths (Å) and angles (°) for MGU optimized at the DFT-B3LYP/6-31+G\*\* level, with solvent treatment via PCM method (water).

| Vector     | Length |
|------------|--------|
| C1-N4      | 1.334  |
| C1-N3      | 1.338  |
| C1-N2      | 1.345  |
| C5-N4      | 1.459  |
| H2a-N2     | 1.019  |
| H2b-N2     | 1.020  |
| H3a-N3     | 1.020  |
| H3b-N3     | 1.018  |
| H4-N4      | 1.032  |
| H5a-C5     | 1.091  |
| H5b-C5     | 1.096  |
| H5c-C5     | 1.097  |
| Vectors    | Angle  |
| N4-C1-N3   | 121.31 |
| N4-C1-N2   | 119.31 |
| N3-C1-N2   | 119.33 |
| H5a-C5-H5b | 108.65 |
| H5a-C5-H5c | 108.48 |
| H5a-C5-N4  | 107.65 |
| H5b-C5-H5c | 109.38 |
| H5b-C5-N4  | 111.18 |
| H5c-C5-N4  | 111.40 |
| H2a-N2-H2b | 117.25 |
| H2a-N2-C1  | 120.04 |
| H2b-N2-C1  | 119.02 |
| H3b-N3-H3a | 117.73 |
| H3b-N3-C1  | 122.46 |
| H3a-N3-C1  | 119.80 |
| H4-N4-C1   | 117.16 |
| H4-N4-C5   | 118.53 |
| C1-N4-C5   | 124.13 |



**TWO-PARTICLE SYSTEMS**

**Small particle systems**

**F-H...F<sup>-</sup>**

Table 113S. Computed atomic orthogonal coordinates for FH...F<sup>-</sup> optimized at the DFT-B3LYP/6-31G\*\* level.

| Atom | x        | Y        | z       |
|------|----------|----------|---------|
| F1   | 0.00000  | -0.11506 | 0.00000 |
| F3   | 0.00000  | 0.11506  | 0.00000 |
| H2   | -0.00003 | -0.00001 | 0.00000 |

Table 114S. Computed bond lengths (Å) and angles (°) for FH...F<sup>-</sup> optimized at the DFT-B3LYP/6-31G\*\* level.

| Vector | Length |
|--------|--------|
| F1-H2  | 1.151  |
| F3-H2  | 1.151  |

  

| Vectors  | Angle  |
|----------|--------|
| F1-H2-F3 | 179.97 |

Table 115S. Computed atomic orthogonal coordinates for FH...F<sup>-</sup> optimized at the DFT-B3LYP/6-31++G\*\* level.

| Atom | x        | y        | z       |
|------|----------|----------|---------|
| F1   | 0.00000  | -0.11471 | 0.00000 |
| F3   | 0.00000  | 0.11471  | 0.00000 |
| H2   | -0.00002 | -0.00001 | 0.00000 |

Table 116S. Computed bond lengths (Å) and angles (°) for FH...F<sup>-</sup> optimized at the DFT-B3LYP/6-31++G\*\* level.

| Vector | Length |
|--------|--------|
| F1-H2  | 1.147  |
| F3-H2  | 1.147  |

  

| Vectors  | Angle  |
|----------|--------|
| F1-H2-F3 | 180.00 |

Table 117S. Computed atomic orthogonal coordinates for FH...F<sup>-</sup> optimized at the *ab initio*-CCSD(T)/6-311++G\*\* level.

| Atom | x       | y       | z        |
|------|---------|---------|----------|
| F1   | 0.00000 | 0.00000 | -0.11346 |
| F3   | 0.00000 | 0.00000 | 0.11347  |
| H2   | 0.00000 | 0.00000 | -0.00004 |

Table 118S. Computed bond lengths (Å) and angles (°) for FH...F<sup>-</sup> optimized at the *ab initio*-CCSD(T)/6-311++G\*\* level.

| Vector  | Length |
|---------|--------|
| F1-H2   | 1.1342 |
| H2...F3 | 1.1351 |

  

| Vectors    | Angle  |
|------------|--------|
| F1-H2...F3 | 180.00 |

Cl-H...Cl<sup>-</sup>Table 119S. Computed atomic orthogonal coordinates for ClH...Cl<sup>-</sup> optimized at the DFT-B3LYP/6-31G\*\* level.

| Atom | x       | Y       | z        |
|------|---------|---------|----------|
| C11  | 0.00000 | 0.00000 | -0.15778 |
| C13  | 0.00000 | 0.00000 | 0.15778  |
| H2   | 0.00000 | 0.00000 | -0.00005 |

Table 120S. Computed bond lengths (Å) and angles (°) for ClH...Cl<sup>-</sup> optimized at the DFT-B3LYP/6-31G\*\* level.

| Vector | Length |
|--------|--------|
| C11-H2 | 1.577  |
| C13-H2 | 1.578  |

  

| Vectors    | Angle  |
|------------|--------|
| C11-H2-C13 | 180.00 |

Table 121S. Computed atomic orthogonal coordinates for ClH...Cl<sup>-</sup> optimized at the DFT-B3LYP/6-311++G\*\* level.

| Atom | x       | y       | z        |
|------|---------|---------|----------|
| Cl1  | 0.00000 | 0.00000 | -0.15775 |
| Cl3  | 0.00000 | 0.00000 | 0.15775  |
| H2   | 0.00000 | 0.00000 | -0.00002 |

Table 122S. Computed bond lengths (Å) and angles (°) for ClH...Cl<sup>-</sup> optimized at the DFT-B3LYP/6-311++G\*\* level.

| Vector   | Length |
|----------|--------|
| Cl1-H2   | 1.5773 |
| H2...Cl3 | 1.5777 |

  

| Vectors      | Angle  |
|--------------|--------|
| Cl1-H2...Cl3 | 180.00 |

Table 123S. Computed atomic orthogonal coordinates for ClH...Cl<sup>-</sup> optimized at the *ab initio*-CCSD(T)/6-311++G\*\* level.

| Atom | x       | y       | z        |
|------|---------|---------|----------|
| Cl1  | 0.00000 | 0.00000 | -0.15552 |
| Cl3  | 0.00000 | 0.00000 | 0.15552  |
| H2   | 0.00000 | 0.00000 | -0.00005 |

Table 124S. Computed bond lengths (Å) and angles (°) for ClH...Cl<sup>-</sup> optimized at the the *ab initio*-CCSD(T)/6-311++G\*\* level.

| Vector   | Length |
|----------|--------|
| Cl1-H2   | 1.5547 |
| H2...Cl3 | 1.5557 |

  

| Vectors      | Angle  |
|--------------|--------|
| Cl1-H2...Cl3 | 180.00 |

**FH...OH<sub>2</sub>**Table 125S. Computed atomic orthogonal coordinates for FH...OH<sub>2</sub> optimized at the *ab initio*-RHF/6-31G\* level.

| Atom | x       | y        | z        |
|------|---------|----------|----------|
| F2   | 0.00000 | 0.00000  | 0.14668  |
| O3   | 0.00000 | 0.00000  | -0.12622 |
| H1   | 0.00000 | 0.00000  | 0.05465  |
| H5   | 0.00000 | -0.07625 | -0.18249 |
| H4   | 0.00000 | 0.07625  | -0.18249 |

Table 126S. Computed bond lengths (Å) and angles (°) for FH...OH<sub>2</sub> optimized at the *ab initio*-RHF/6-31G\* level.

| Vector     | Length         |
|------------|----------------|
| F2-H1      | 0.920          |
| O3-H4      | 0.948          |
| O3-H5      | 0.948          |
| H1...O3    | 1.809          |
| F2...O3    | 2.729          |
| Vectors    | Angle          |
| H4-O3-H5   | 107.15         |
| F2-H1...O3 | 180.00 (fixed) |

Table 127S. Computed atomic orthogonal coordinates for FH...OH<sub>2</sub> optimized at the *ab initio*-CCSD(T)/6-31G\*\* level.

| Atom | x       | y        | z        |
|------|---------|----------|----------|
| H5   | 0.00000 | -0.07682 | -0.18213 |
| H4   | 0.00000 | 0.07682  | -0.18213 |
| F2   | 0.00000 | 0.00000  | 0.14527  |
| O3   | 0.00000 | 0.00000  | -0.12442 |
| H1   | 0.00000 | 0.00000  | 0.05221  |

Table 128S. Computed bond lengths (Å) and angles (°) for FH...OH<sub>2</sub> optimized at the *ab initio*-CCSD(T)/6-31G\*\* level.

| Vector  | Length |
|---------|--------|
| F2-H1   | 0.931  |
| O3-H4   | 0.961  |
| O3-H5   | 0.961  |
| H1...O3 | 1.766  |
| F2...O3 | 2.697  |

  

| Vectors    | Angle         |
|------------|---------------|
| H4-O3-H5   | 106.17        |
| F2-H1...O3 | 180.00(fixed) |



Table 129S. Computed atomic orthogonal coordinates for FH...OH<sub>2</sub> optimized at the *ab initio*-CCSD(T)/6-31+G\*\* level.

| Atom | x       | y        | z        |
|------|---------|----------|----------|
| H1   | 0.00000 | 0.00000  | 0.05055  |
| F2   | 0.00000 | 0.00000  | 0.14438  |
| O3   | 0.00000 | 0.00000  | -0.12356 |
| H4   | 0.00000 | 0.07749  | -0.18074 |
| H5   | 0.00000 | -0.07749 | -0.18074 |

Table 130S. Computed bond lengths (Å) and angles (°) for FH...OH<sub>2</sub> optimized at the *ab initio*-CCSD(T)/6-31+G\*\* level.

| Vector  | Length |
|---------|--------|
| F2-H1   | 0.938  |
| O3-H4   | 0.963  |
| O3-H5   | 0.963  |
| H1...O3 | 1.741  |
| F2...O3 | 2.679  |

  

| Vectors    | Angle        |
|------------|--------------|
| H4-O3-H5   | 107.15       |
| O3...H1-F2 | 180.0(fixed) |

Table 131S. Computed atomic orthogonal coordinates for FH...OH<sub>2</sub> optimized at the DFT-B3LYP/6-31G\*\* level.

| Atom | x       | y        | z        |
|------|---------|----------|----------|
| H1   | 0.00000 | 0.00000  | 0.04953  |
| H4   | 0.00000 | 0.07730  | -0.18006 |
| H5   | 0.00000 | -0.07730 | -0.18006 |
| F2   | 0.00000 | 0.00000  | 0.14342  |
| O3   | 0.00000 | 0.00000  | -0.12253 |

Table 132S. Computed bond lengths (Å) and angles (°) for FH...OH<sub>2</sub> optimized at the DFT-B3LYP/6-31G\*\* level.

| Vector  | Length |
|---------|--------|
| F2-H1   | 0.939  |
| O3-H4   | 0.964  |
| O3-H5   | 0.964  |
| H1...O3 | 1.721  |
| F2...O3 | 2.659  |

  

| Vectors    | Angle        |
|------------|--------------|
| H4-O3-H5   | 106.68       |
| F2-H1...O3 | 180.0(fixed) |

Table 133S. Computed atomic orthogonal coordinates for FH...OH<sub>2</sub> optimized at the DFT-B3LYP/6-31+G\*\* level.

| Atom | x       | y        | z        |
|------|---------|----------|----------|
| H1   | 0.00000 | 0.00000  | 0.04714  |
| H4   | 0.00000 | 0.07803  | -0.17768 |
| H5   | 0.00000 | -0.07803 | -0.17768 |
| F2   | 0.00000 | 0.00000  | 0.14180  |
| O3   | 0.00000 | 0.00000  | -0.12100 |

Table 134S. Computed bond lengths (Å) and angles (°) for FH...OH<sub>2</sub> optimized at the DFT-B3LYP/6-31+G\*\* level.

| Vector  | Length |
|---------|--------|
| F2-H1   | 0.947  |
| O3-H4   | 0.964  |
| O3-H5   | 0.964  |
| H1...O3 | 1.681  |
| F2...O3 | 2.628  |

  

| Vectors    | Angle         |
|------------|---------------|
| H4-O3-H5   | 108.01        |
| F2-H1...O3 | 180.00(fixed) |

**HO-H...FH**

Table 135S. Computed atomic orthogonal coordinates for HO-H...FH optimized at the DFT-B3LYP/6-31G\*\* level.

| Atom | x        | y        | z       |
|------|----------|----------|---------|
| H1   | -0.00130 | 0.23187  | 0.00000 |
| H5   | -0.09150 | -0.16732 | 0.00000 |
| O4   | 0.00446  | -0.15732 | 0.00000 |
| F2   | 0.00446  | 0.13950  | 0.00000 |
| H3   | 0.01698  | -0.06150 | 0.00000 |

Table 136S. Computed bond lengths (Å) and angles (°) for HO-H...FH optimized at the DFT-B3LYP/6-31G\*\* level.

| Vector  | Length |
|---------|--------|
| F2-H1   | 0.925  |
| O4-H5   | 0.965  |
| O4-H3   | 0.966  |
| H3...F2 | 2.014  |
| O4...F2 | 2.968  |

  

| Vectors    | Angle  |
|------------|--------|
| H5-O4-H3   | 103.39 |
| O4-H3...F2 | 168.99 |

Table 137S. Computed atomic orthogonal coordinates for HO-H...FH optimized at the DFT-B3LYP/6-31+G\*\* level.

| Atom | x        | y        | z       |
|------|----------|----------|---------|
| H1   | -0.00144 | 0.23886  | 0.00000 |
| H5   | -0.09129 | -0.17605 | 0.00000 |
| O4   | 0.00440  | -0.16379 | 0.00000 |
| F2   | 0.00440  | 0.14618  | 0.00000 |
| H3   | 0.01790  | -0.06808 | 0.00000 |

Table 138S. Computed bond lengths (Å) and angles (°) for HO-H...FH optimized at the DFT-B3LYP/6-31+G\*\* level.

| Vector  | Length |
|---------|--------|
| F2-H1   | 0.929  |
| O4-H5   | 0.965  |
| O4-H3   | 0.967  |
| H3...F2 | 2.147  |
| O4...F2 | 3.100  |

  

| Vectors    | Angle  |
|------------|--------|
| H5-O4-H3   | 105.33 |
| F2...H3-O4 | 168.37 |

Table 139S. Computed atomic orthogonal coordinates for HO-H...FH optimized at the *ab initio*-CCSD(T)/6-31G\*\* level.

| Atom | x        | y        | z       |
|------|----------|----------|---------|
| H1   | -0.00101 | 0.23450  | 0.00000 |
| H5   | -0.09116 | -0.17061 | 0.00000 |
| O4   | 0.00444  | -0.16022 | 0.00000 |
| F2   | 0.00444  | 0.14251  | 0.00000 |
| H3   | 0.01672  | -0.06478 | 0.00000 |

Table 140S. Computed bond lengths (Å) and angles (°) for HO-H...FH optimized at the *ab initio*-CCSD(T)/6-31G\*\* level.

| Vector  | Length |
|---------|--------|
| F2-H1   | 0.922  |
| O4-H5   | 0.962  |
| O4-H3   | 0.962  |
| H3...F2 | 2.077  |
| O4...F2 | 3.027  |

  

| Vectors    | Angle  |
|------------|--------|
| H5-O4-H3   | 103.53 |
| O4-H3...F2 | 169.28 |

Table 141S. Computed atomic orthogonal coordinates for HO-H...FH optimized at the *ab initio*-CCSD(T)/6-31+G\*\* level.

| Atom | x        | y        | z       |
|------|----------|----------|---------|
| H1   | -0.00957 | 0.23751  | 0.00000 |
| F2   | 0.00386  | 0.14587  | 0.00000 |
| H3   | 0.03609  | -0.07411 | 0.00000 |
| O4   | 0.00386  | -0.16497 | 0.00000 |
| H5   | -0.09209 | -0.15645 | 0.00000 |

Table 142S. Computed bond lengths (Å) and angles (°) for HO-H...FH optimized at the *ab initio*-CCSD(T)/6-31+G\*\* level.

| Vector  | Length |
|---------|--------|
| F2-H1   | 0.926  |
| O4-H5   | 0.963  |
| O4-H3   | 0.964  |
| H3...F2 | 2.223  |
| O4...F2 | 3.108  |

  

| Vectors    | Angle  |
|------------|--------|
| H5-O4-H3   | 104.46 |
| F2...H3-O4 | 152.13 |

Table 143S. Computed atomic orthogonal coordinates for HO-H...FH optimized at the *ab initio* MP2/6-31+G\*\* level.

| Atom | x        | y        | z       |
|------|----------|----------|---------|
| H1   | -0.00796 | 0.23833  | 0.00000 |
| H3   | 0.03247  | -0.07307 | 0.00000 |
| H5   | -0.09222 | -0.16084 | 0.00000 |
| F2   | 0.00398  | 0.14635  | 0.00000 |
| O4   | 0.00398  | -0.16520 | 0.00000 |

Table 144S. Computed bond lengths (Å) and angles (°) for HO-H...FH optimized at the *ab initio* MP2/6-31+G\*\* level.

| Vector  | Length |
|---------|--------|
| F2-H1   | 0.928  |
| O4-H5   | 0.963  |
| O4-H3   | 0.964  |
| H3...F2 | 2.213  |
| O4...F2 | 3.115  |

  

| Vectors    | Angle  |
|------------|--------|
| H5-O4-H3   | 104.59 |
| F2...H3-O4 | 155.42 |



**ClH...OH<sub>2</sub>**

Table 145S. Computed atomic orthogonal coordinates for ClH...OH<sub>2</sub> optimized at the *ab initio*-CCSD(T)/6-31G\*\* level.

| Atom | x       | y        | z        |
|------|---------|----------|----------|
| Cl2  | 0.00000 | 0.00000  | 0.12306  |
| H1   | 0.00000 | 0.00000  | -0.00541 |
| O3   | 0.00000 | 0.00000  | -0.19703 |
| H4   | 0.00000 | 0.07654  | -0.25523 |
| H5   | 0.00000 | -0.07654 | -0.25523 |

Table 146S. Computed bond lengths (Å) and angles (°) for ClH...OH<sub>2</sub> optimized at the *ab initio*-CCSD(T)/6-31G\*\* level.

| Vector   | Length |
|----------|--------|
| O3...H1  | 1.916  |
| O3...Cl2 | 3.201  |
| Cl2-H1   | 1.285  |
| O3-H4    | 0.962  |
| O3-H5    | 0.962  |

  

| Vectors    | Angle  |
|------------|--------|
| H1...O3-H4 | 127.25 |
| H1...O3-H5 | 127.25 |
| H4-O3-H5   | 105.50 |

Table 147S. Computed atomic orthogonal coordinates for ClH...OH<sub>2</sub> optimized at the *ab initio*-CCSD(T)/6-31+G\*\* level.

| Atom | x       | y        | z        |
|------|---------|----------|----------|
| H5   | 0.00000 | -0.07711 | -0.25633 |
| H4   | 0.00000 | 0.07711  | -0.25633 |
| Cl2  | 0.00000 | 0.00000  | 0.12384  |
| O3   | 0.00000 | 0.00000  | -0.19852 |
| H1   | 0.00000 | 0.00000  | -0.00457 |

Table 148S. Computed bond lengths (Å) and angles (°) for ClH...OH<sub>2</sub> optimized at the *ab initio*-CCSD(T)/6-31+G\*\* level.

| Vector   | Length |
|----------|--------|
| O3...H1  | 1.940  |
| O3...Cl2 | 3.224  |
| Cl2-H1   | 1.284  |
| O3-H4    | 0.964  |
| O3-H5    | 0.964  |

  

| Vectors    | Angle  |
|------------|--------|
| H1...O3-H4 | 126.86 |
| H1...O3-H5 | 126.86 |
| H4-O3-H5   | 106.28 |

Table 149S. Computed atomic orthogonal coordinates for ClH...OH<sub>2</sub> optimized at the DFT-B3LYP/6-31G\*\* level.

| Atom | x       | y        | z        |
|------|---------|----------|----------|
| H5   | 0.00000 | -0.07725 | -0.24870 |
| H4   | 0.00000 | 0.07725  | -0.24870 |
| Cl2  | 0.00000 | 0.00000  | 0.11980  |
| O3   | 0.00000 | 0.00000  | -0.19102 |
| H1   | 0.00000 | 0.00000  | -0.01113 |

Table 150S. Computed bond lengths (Å) and angles (°) for ClH...OH<sub>2</sub> optimized at the DFT-B3LYP/6-31G\*\* level.

| Vector   | Length |
|----------|--------|
| O3...H1  | 1.799  |
| O3...Cl2 | 3.108  |
| Cl2-H1   | 1.309  |
| O3-H4    | 0.964  |
| O3-H5    | 0.964  |

  

| Vectors    | Angle  |
|------------|--------|
| H4-O3-H5   | 106.51 |
| H1...O3-H4 | 126.75 |
| H1...O3-H5 | 126.75 |

Table 151S. Computed atomic orthogonal coordinates for ClH...OH<sub>2</sub> optimized at the DFT-B3LYP/6-31+G\*\* level.

| Atom | x       | y        | z        |
|------|---------|----------|----------|
| H5   | 0.00000 | -0.07772 | -0.25161 |
| H4   | 0.00000 | 0.07772  | -0.25161 |
| Cl2  | 0.00000 | 0.00000  | 0.12162  |
| O3   | 0.00000 | 0.00000  | -0.19442 |
| H1   | 0.00000 | 0.00000  | -0.00888 |

Table 152S. Computed bond lengths (Å) and angles (°) for ClH...OH<sub>2</sub> optimized at the DFT-B3LYP/6-31+G\*\* level.

| Vector   | Length |
|----------|--------|
| O3...H1  | 1.855  |
| O3...Cl2 | 3.224  |
| Cl2-H1   | 1.305  |
| O3-H4    | 0.965  |
| O3-H5    | 0.965  |

  

| Vectors    | Angle  |
|------------|--------|
| H1...O3-H4 | 126.35 |
| H1...O3-H5 | 126.35 |
| H4-O3-H5   | 107.31 |

Table 153S. Computed atomic orthogonal coordinates for ClH...OH<sub>2</sub> optimized at the DFT-B3LYP/6-31++G\*\* level.

| Atom | x       | y        | z        |
|------|---------|----------|----------|
| H5   | 0.00000 | -0.07773 | -0.25160 |
| H4   | 0.00000 | 0.07773  | -0.25160 |
| Cl2  | 0.00000 | 0.00000  | 0.12161  |
| O3   | 0.00000 | 0.00000  | -0.19441 |
| H1   | 0.00000 | 0.00000  | -0.00892 |

Table 154S. Computed bond lengths (Å) and angles (°) for ClH...OH<sub>2</sub> optimized at the DFT-B3LYP/6-31++G\*\* level.

| Vector   | Length |
|----------|--------|
| O3...H1  | 1.855  |
| O3...Cl2 | 3.160  |
| Cl2-H1   | 1.305  |
| O3-H4    | 0.965  |
| O3-H5    | 0.965  |

  

| Vectors    | Angle  |
|------------|--------|
| H4-O3-H5   | 107.31 |
| H1...O3-H4 | 126.34 |
| H1...O3-H5 | 126.34 |

Table 155S. Computed atomic orthogonal coordinates for ClH...OH<sub>2</sub> optimized at the DFT-B3LYP/6-311++G\*\* level.

| Atom | x       | y        | z        |
|------|---------|----------|----------|
| H5   | 0.00000 | -0.07728 | -0.25225 |
| H4   | 0.00000 | 0.07728  | -0.25225 |
| Cl2  | 0.00000 | 0.00000  | 0.12191  |
| O3   | 0.00000 | 0.00000  | -0.19493 |
| H1   | 0.00000 | 0.00000  | -0.00856 |

Table 156S. Computed bond lengths (Å) and angles (°) for ClH...OH<sub>2</sub> optimized at the DFT-B3LYP/6-311++G\*\* level.

| Vector   | Length |
|----------|--------|
| O3...H1  | 1.864  |
| O3...Cl2 | 3.168  |
| Cl2-H1   | 1.305  |
| O3-H4    | 0.962  |
| O3-H5    | 0.962  |

  

| Vectors    | Angle  |
|------------|--------|
| H1...O3-H4 | 126.56 |
| H1...O3-H5 | 126.56 |
| H4-O3-H5   | 106.87 |

Table 157S. Computed atomic orthogonal coordinates for ClH...OH<sub>2</sub> optimized at the *ab initio*-CCSD(T)/6-311++G\*\* level.

| Atom | x       | y        | z        |
|------|---------|----------|----------|
| Cl2  | 0.00000 | 0.00000  | 0.12421  |
| H5   | 0.00000 | -0.07609 | -0.25759 |
| H4   | 0.00000 | 0.07609  | -0.25759 |
| H1   | 0.00000 | 0.00000  | -0.00449 |
| O3   | 0.00000 | 0.00000  | -0.19900 |

Table 158S. Computed bond lengths (Å) and angles (°) for ClH...OH<sub>2</sub> optimized at the *ab initio*-CCSD(T)/6-311++G\*\* level.

| Vector   | Length |
|----------|--------|
| O3...H1  | 1.945  |
| O3...Cl2 | 3.232  |
| Cl2-H1   | 1.287  |
| O3-H4    | 0.960  |
| O3-H5    | 0.960  |

  

| Vectors    | Angle  |
|------------|--------|
| H1...O3-H4 | 127.60 |
| H1...O3-H5 | 127.60 |
| H4-O3-H5   | 104.81 |

Table 159S. Computed atomic orthogonal coordinates for ClH...OH<sub>2</sub> optimized at the *ab initio*-CCSD(T)/6-31++G\*\* level.

| Atom | x       | y        | z        |
|------|---------|----------|----------|
| H5   | 0.00000 | -0.07712 | -0.25635 |
| H4   | 0.00000 | 0.07712  | -0.25635 |
| Cl2  | 0.00000 | 0.00000  | 0.12386  |
| O3   | 0.00000 | 0.00000  | -0.19853 |
| H1   | 0.00000 | 0.00000  | -0.00461 |

Table 160S. Computed bond lengths (Å) and angles (°) for ClH...OH<sub>2</sub> optimized at the *ab initio*-CCSD(T)/6-31++G\*\* level.

| Vector   | Length |
|----------|--------|
| O3...H1  | 1.939  |
| O3...Cl2 | 3.224  |
| Cl2-H1   | 1.285  |
| O3-H4    | 0.964  |
| O3-H5    | 0.964  |

  

| Vectors    | Angle  |
|------------|--------|
| H1...O3-H4 | 126.86 |
| H1...O3-H5 | 126.86 |
| H4-O3-H5   | 106.28 |



**HO-H...CIH**

Table 161S. Computed atomic orthogonal coordinates for HO-H...CIH optimized at the DFT-B3LYP/6-31G\*\* level.

| Atom | x        | y        | z       |
|------|----------|----------|---------|
| H1   | 0.03361  | -0.24040 | 0.00000 |
| O4   | -0.00065 | 0.23377  | 0.00000 |
| C12  | -0.00065 | -0.11645 | 0.00000 |
| H3   | -0.08401 | 0.18513  | 0.00000 |
| H5   | 0.06676  | 0.16468  | 0.00000 |

Table 162S. Computed bond lengths (Å) and angles (°) for HO-H...CIH optimized at the DFT-B3LYP/6-31G\*\* level.

| Vector   | Length |
|----------|--------|
| O4...C12 | 3.502  |
| H3...C12 | 3.129  |
| H5...C12 | 2.891  |
| C12-H1   | 1.286  |
| O4-H3    | 0.965  |
| O4-H5    | 0.965  |

  

| Vectors     | Angle  |
|-------------|--------|
| C12...H5-O4 | 122.22 |
| C12...H3-O4 | 104.81 |
| H5...C12-H1 | 151.07 |
| H3...C12-H1 | 180.   |
| H3-O4-H5    | 104.03 |

Table 163S. Computed atomic orthogonal coordinates for HO-H...ClH optimized at the DFT-B3LYP/6-31+G\*\* level.

| Atom | x        | y        | z       |
|------|----------|----------|---------|
| H1   | 0.03162  | -0.24722 | 0.00000 |
| O4   | -0.00073 | 0.24488  | 0.00000 |
| Cl2  | -0.00073 | -0.12268 | 0.00000 |
| H3   | -0.08317 | 0.19464  | 0.00000 |
| H5   | 0.06983  | 0.17898  | 0.00000 |

Table 164S. Computed bond lengths (Å) and angles (°) for HO-H...ClH optimized at the DFT-B3LYP/6-31+G\*\* level.

| Vector   | Length |
|----------|--------|
| O4...Cl2 | 3.676  |
| H3...Cl2 | 3.279  |
| H5...Cl2 | 3.098  |
| Cl2-H1   | 1.287  |
| O4-H3    | 0.965  |
| O4-H5    | 0.965  |

  

| Vectors     | Angle  |
|-------------|--------|
| Cl2...H5-O4 | 119.88 |
| Cl2...H3-O4 | 106.80 |
| H5...Cl2-H1 | 152.27 |
| H3...Cl2-H1 | 179.98 |
| H3-O4-H5    | 105.60 |

**TWO-PARTICLE SYSTEMS**  
**Imidazole...X<sup>-</sup> (X: Cl<sup>-</sup>, F<sup>-</sup>) systems**

**(IM)N1-H...Cl<sup>-</sup>**

Table 165S. Computed atomic orthogonal coordinates for (IM)N1-H...Cl<sup>-</sup> optimized at the DFT-B3LYP/6-31+G\*\* level.

| Atom | x        | y        | z       |
|------|----------|----------|---------|
| C11  | -0.00820 | -0.28544 | 0.00000 |
| N1   | 0.00000  | 0.02391  | 0.00000 |
| C2   | 0.11071  | 0.10227  | 0.00000 |
| N3   | 0.08166  | 0.23197  | 0.00000 |
| C4   | -0.05610 | 0.23626  | 0.00000 |
| C5   | -0.10808 | 0.10833  | 0.00000 |
| H1   | -0.00279 | -0.08134 | 0.00000 |
| H2   | 0.21039  | 0.06045  | 0.00000 |
| H4   | -0.10965 | 0.33033  | 0.00000 |
| H5   | -0.20927 | 0.07067  | 0.00000 |

Table 166S. Computed bond lengths (Å) and angles (°) for (IM)N1-H...Cl<sup>-</sup> optimized at the DFT-B3LYP/6-31+G\*\* level.

| Vector   | Length |
|----------|--------|
| N1-C2    | 1.356  |
| N1-C5    | 1.371  |
| N3-C2    | 1.329  |
| N3-C4    | 1.378  |
| C4-C5    | 1.381  |
| H1-N1    | 1.053  |
| H2-C2    | 1.081  |
| H4-C4    | 1.082  |
| H5-C5    | 1.080  |
| H1...Cl1 | 2.042  |
| N1...Cl1 | 3.095  |

  

| Vectors     | Angle  |
|-------------|--------|
| H1-N1-C2    | 126.81 |
| H1-N1-C5    | 126.47 |
| C2-N1-C5    | 106.72 |
| C2-N3-C4    | 104.41 |
| H2-C2-N3    | 125.38 |
| H2-C2-N1    | 121.95 |
| N3-C2-N1    | 112.67 |
| H4-C4-N3    | 121.43 |
| H4-C4-C5    | 128.24 |
| N3-C4-C5    | 110.33 |
| H5-C5-N1    | 121.59 |
| H5-C5-C4    | 132.53 |
| N1-C5-C4    | 105.88 |
| N1-H1...Cl1 | 180.00 |

Table 167S. Computed atomic orthogonal coordinates for (IM)N1-H...Cl<sup>-</sup> optimized at the DFT-B3LYP/6-31G\*\* level.

| Atom | x        | y        | z       |
|------|----------|----------|---------|
| C11  | -0.00893 | -0.28338 | 0.00000 |
| H4   | -0.10884 | 0.32940  | 0.00000 |
| H5   | -0.20891 | 0.07033  | 0.00000 |
| H2   | 0.21012  | 0.05886  | 0.00000 |
| N3   | 0.08238  | 0.23096  | 0.00000 |
| C4   | -0.05531 | 0.23522  | 0.00000 |
| H1   | -0.00309 | -0.08305 | 0.00000 |
| C5   | -0.10763 | 0.10774  | 0.00000 |
| C2   | 0.11059  | 0.10123  | 0.00000 |
| N1   | 0.00000  | 0.02287  | 0.00000 |

Table 168S. Computed bond lengths (Å) and angles (°) for (IM)N1-H...Cl<sup>-</sup> optimized at the DFT-B3LYP/6-31G\*\* level.

| Vector      | Distance      |
|-------------|---------------|
| N1-C2       | 1.355         |
| N1-C5       | 1.371         |
| N3-C2       | 1.328         |
| N3-C4       | 1.378         |
| C4-C5       | 1.378         |
| H1-N1       | 1.060         |
| H2-C2       | 1.082         |
| H4-C4       | 1.083         |
| H5-C5       | 1.080         |
| C11...H1    | 2.004         |
| C11...N1    | 3.064         |
| Vectors     | Angle         |
| H1-N1-C2    | 126.99        |
| H1-N1-C5    | 126.59        |
| C2-N1-C5    | 106.42        |
| C2-N3-C4    | 104.04        |
| H2-C2-N3    | 125.33        |
| H2-C2-N1    | 121.62        |
| N3-C2-N1    | 113.05        |
| H4-C4-N3    | 121.39        |
| H4-C4-C5    | 128.07        |
| N3-C4-C5    | 110.54        |
| H5-C5-N1    | 121.47        |
| H5-C5-C4    | 132.59        |
| N1-C5-C4    | 105.94        |
| N1-H1...C11 | 180.00(fixed) |

Table 169S. Computed atomic orthogonal coordinates for (IM)N1-H...Cl<sup>-</sup> optimized at the *ab initio* MP2/6-31+G\*\* level.

| Atom | x        | y        | z       |
|------|----------|----------|---------|
| C11  | -0.00783 | -0.28244 | 0.00000 |
| N1   | 0.00000  | 0.02244  | 0.00000 |
| C2   | 0.11078  | 0.10081  | 0.00000 |
| N3   | 0.08125  | 0.23146  | 0.00000 |
| C4   | -0.05652 | 0.23480  | 0.00000 |
| C5   | -0.10823 | 0.10620  | 0.00000 |
| H1   | -0.00269 | -0.08247 | 0.00000 |
| H2   | 0.21018  | 0.05928  | 0.00000 |
| H4   | -0.11039 | 0.32826  | 0.00000 |
| H5   | -0.20896 | 0.06816  | 0.00000 |

Table 170S. Computed bond lengths (Å) and angles (°) for (IM)N1-H...Cl<sup>-</sup> optimized at the *ab initio* MP2/6-31+G\*\* level.

| Vector   | Length |
|----------|--------|
| N1-C2    | 1.357  |
| N1-C5    | 1.369  |
| N3-C2    | 1.339  |
| N3-C4    | 1.378  |
| C4-C5    | 1.386  |
| H1-N1    | 1.049  |
| H2-C2    | 1.077  |
| H4-C4    | 1.079  |
| H5-C5    | 1.077  |
| H1...Cl1 | 2.000  |
| N1...Cl1 | 3.050  |

  

| Vectors     | Angle         |
|-------------|---------------|
| H1-N1-C2    | 126.75        |
| H1-N1-C5    | 126.27        |
| C2-N1-C5    | 106.99        |
| C2-N3-C4    | 104.12        |
| H2-C2-N3    | 125.41        |
| H2-C2-N1    | 122.05        |
| N3-C2-N1    | 112.54        |
| H4-C4-N3    | 121.35        |
| H4-C4-C5    | 128.14        |
| N3-C4-C5    | 110.52        |
| H5-C5-N1    | 121.57        |
| H5-C5-C4    | 132.59        |
| N1-C5-C4    | 105.83        |
| N1-H1...Cl1 | 180.00(fixed) |



**(IM)C2-H...Cl<sup>-</sup>**Table 171S. Computed atomic orthogonal coordinates for (IM)C2-H...Cl<sup>-</sup> optimized at the DFT-B3LYP/6-31+G\*\* level.

| Atom | x        | y        | z       |
|------|----------|----------|---------|
| C11  | -0.12409 | -0.28764 | 0.00000 |
| N1   | 0.13565  | 0.05757  | 0.00000 |
| C2   | 0.00000  | 0.03826  | 0.00000 |
| N3   | -0.06353 | 0.15434  | 0.00000 |
| C4   | 0.03497  | 0.25094  | 0.00000 |
| C5   | 0.16003  | 0.19351  | 0.00000 |
| H1   | 0.20360  | -0.01702 | 0.00000 |
| H2   | -0.03897 | -0.06408 | 0.00000 |
| H4   | 0.01045  | 0.35635  | 0.00000 |
| H5   | 0.25971  | 0.23502  | 0.00000 |

Table 172S. Computed bond lengths (Å) and angles (°) for (IM)C2-H...Cl<sup>-</sup> optimized at the DFT-B3LYP/6-31+G\*\* level.

| Vector   | Length |
|----------|--------|
| N1-C2    | 1.370  |
| N1-C5    | 1.381  |
| N3-C2    | 1.323  |
| N3-C4    | 1.380  |
| C4-C5    | 1.376  |
| H1-N1    | 1.009  |
| H2-C2    | 1.095  |
| H4-C4    | 1.082  |
| H5-C5    | 1.080  |
| H2...Cl1 | 2.392  |
| C2...Cl1 | 3.487  |

  

| Vectors     | Angle          |
|-------------|----------------|
| H1-N1-C2    | 124.23         |
| H1-N1-C5    | 127.50         |
| C2-N1-C5    | 108.27         |
| C2-N3-C4    | 105.75         |
| H2-C2-N3    | 130.46         |
| H2-C2-N1    | 118.95         |
| N3-C2-N1    | 110.59         |
| H4-C4-C5    | 127.76         |
| H4-C4-N3    | 121.35         |
| C5-C4-N3    | 110.89         |
| H5-C5-C4    | 132.73         |
| H5-C5-N1    | 122.78         |
| C4-C5-N1    | 104.50         |
| C2-H2...Cl1 | 180.00 (fixed) |

Table 173S. Computed atomic orthogonal coordinates for (IM)C2-H...Cl<sup>-</sup> optimized at the DFT-B3LYP/6-31G\*\* level.

| Atom | x        | y        | z       |
|------|----------|----------|---------|
| C11  | -0.13011 | -0.27969 | 0.00000 |
| N1   | 0.13609  | 0.05174  | 0.00000 |
| C2   | 0.00000  | 0.03635  | 0.00000 |
| N3   | -0.06016 | 0.15419  | 0.00000 |
| C4   | 0.04135  | 0.24758  | 0.00000 |
| C5   | 0.16447  | 0.18681  | 0.00000 |
| H1   | 0.20178  | -0.02472 | 0.00000 |
| H2   | -0.04189 | -0.06540 | 0.00000 |
| H4   | 0.02017  | 0.35380  | 0.00000 |
| H5   | 0.26541  | 0.22515  | 0.00000 |

Table 174S. Computed bond lengths (Å) and angles (°) for (IM)C2-H...Cl<sup>-</sup> optimized at the DFT-B3LYP/6-31G\*\* level.

| Vector   | Distance |
|----------|----------|
| N1-C2    | 1.370    |
| N1-C5    | 1.380    |
| N3-C2    | 1.323    |
| N3-C4    | 1.379    |
| C4-C5    | 1.373    |
| H1-N1    | 1.008    |
| H2-C2    | 1.100    |
| H4-C4    | 1.083    |
| H5-C5    | 1.080    |
| C11...H2 | 2.317    |
| C11...C2 | 3.418    |

  

| Vectors     | Angle         |
|-------------|---------------|
| H1-N1-C2    | 124.22        |
| H1-N1-C5    | 127.47        |
| C2-N1-C5    | 108.32        |
| C2-N3-C4    | 105.57        |
| H2-C2-N3    | 130.58        |
| H2-C2-N1    | 118.83        |
| N3-C2-N1    | 110.59        |
| H4-C4-C5    | 127.55        |
| H4-C4-N3    | 121.34        |
| C5-C4-N3    | 111.12        |
| H5-C5-C4    | 132.93        |
| H5-C5-N1    | 122.66        |
| C4-C5-N1    | 104.40        |
| C2-H2...Cl1 | 180.00(fixed) |

**(IM)C4-H...Cl<sup>-</sup>**Table 175S. Computed atomic orthogonal coordinates for (IM)C4-H...Cl<sup>-</sup> optimized at the DFT-B3LYP/6-31G\*\* level.

| Atom | x        | y        | z       |
|------|----------|----------|---------|
| C11  | -0.01046 | -0.32238 | 0.00000 |
| N1   | 0.06896  | 0.24332  | 0.00000 |
| C2   | -0.06786 | 0.23852  | 0.00000 |
| N3   | -0.11265 | 0.11498  | 0.00000 |
| C4   | 0.00000  | 0.03399  | 0.00000 |
| C5   | 0.11301  | 0.11194  | 0.00000 |
| H1   | 0.12641  | 0.32605  | 0.00000 |
| H2   | -0.12840 | 0.32832  | 0.00000 |
| H4   | -0.00321 | -0.07549 | 0.00000 |
| H5   | 0.21794  | 0.08674  | 0.00000 |

Table 176S. Computed bond lengths (Å) and angles (°) for (IM)C4-H...Cl<sup>-</sup> optimized at the DFT-B3LYP/6-31G\*\* level.

| Vector   | Distance |
|----------|----------|
| N1-C2    | 1.369    |
| N1-C5    | 1.386    |
| N3-C2    | 1.314    |
| N3-C4    | 1.387    |
| C4-C5    | 1.373    |
| H1-N1    | 1.007    |
| H2-C2    | 1.083    |
| H4-C4    | 1.095    |
| H5-C5    | 1.079    |
| C11...H4 | 2.470    |
| C11...C4 | 3.565    |

  

| Vectors     | Angle         |
|-------------|---------------|
| H1-N1-C2    | 126.79        |
| H1-N1-C5    | 126.69        |
| C2-N1-C5    | 106.53        |
| C2-N3-C4    | 105.79        |
| H2-C2-N3    | 126.09        |
| H2-C2-N1    | 121.98        |
| N3-C2-N1    | 111.94        |
| H4-C4-C5    | 126.28        |
| H4-C4-N3    | 124.03        |
| C5-C4-N3    | 109.69        |
| H5-C5-C4    | 131.90        |
| H5-C5-N1    | 122.04        |
| C4-C5-N1    | 106.06        |
| C4-H4...C11 | 180.00(fixed) |

Table 177S. Computed atomic orthogonal coordinates for (IM)C4-H...Cl<sup>-</sup> optimized at the DFT-B3LYP/6-31+G\*\* level.

| Atom | x        | y        | z       |
|------|----------|----------|---------|
| C11  | -0.01159 | -0.32833 | 0.00000 |
| N1   | 0.06984  | 0.24589  | 0.00000 |
| C2   | -0.06713 | 0.24180  | 0.00000 |
| N3   | -0.11217 | 0.11813  | 0.00000 |
| C4   | 0.00000  | 0.03676  | 0.00000 |
| C5   | 0.11355  | 0.11433  | 0.00000 |
| H1   | 0.12759  | 0.32850  | 0.00000 |
| H2   | -0.12760 | 0.33156  | 0.00000 |
| H4   | -0.00346 | -0.07227 | 0.00000 |
| H5   | 0.21830  | 0.08832  | 0.00000 |

Table 178S. Computed bond lengths (Å) and angles (°) for (IM)C4-H...Cl<sup>-</sup> optimized at the DFT-B3LYP/6-31+G\*\* level.

| Vector   | Length |
|----------|--------|
| N1-C2    | 1.370  |
| N1-C5    | 1.386  |
| N3-C2    | 1.316  |
| N3-C4    | 1.386  |
| C4-C5    | 1.375  |
| H1-N1    | 1.008  |
| H2-C2    | 1.082  |
| H4-C4    | 1.091  |
| H5-C5    | 1.079  |
| H4...Cl1 | 2.562  |
| C4...Cl1 | 3.653  |

  

| Vectors     | Angle         |
|-------------|---------------|
| H1-N1-C2    | 126.67        |
| H1-N1-C5    | 126.67        |
| C2-N1-C5    | 106.67        |
| C2-N3-C4    | 105.95        |
| H2-C2-N3    | 126.02        |
| H2-C2-N1    | 122.26        |
| N3-C2-N1    | 111.72        |
| H4-C4-C5    | 126.16        |
| H4-C4-N3    | 124.14        |
| C5-C4-N3    | 109.70        |
| H5-C5-C4    | 131.72        |
| H5-C5-N1    | 122.32        |
| C4-C5-N1    | 105.96        |
| C4-H4...Cl1 | 180.00(fixed) |



**(IM)C5-H...Cl<sup>-</sup>**Table 179S. Computed atomic orthogonal coordinates for (IM)C5-H...Cl<sup>-</sup> optimized at the DFT-B3LYP/6-31G\*\* level.

| Atom | x        | y        | z       |
|------|----------|----------|---------|
| C11  | 0.13821  | -0.27766 | 0.00000 |
| N1   | 0.13723  | 0.04839  | 0.00000 |
| C2   | 0.16630  | 0.18196  | 0.00000 |
| N3   | 0.05676  | 0.25513  | 0.00000 |
| C4   | -0.04691 | 0.16325  | 0.00000 |
| C5   | 0.00000  | 0.03403  | 0.00000 |
| H1   | 0.20219  | -0.02871 | 0.00000 |
| H2   | 0.26781  | 0.21958  | 0.00000 |
| H4   | -0.15008 | 0.19561  | 0.00000 |
| H5   | -0.04453 | -0.06640 | 0.00000 |

Table 180S. Computed bond lengths (Å) and angles (°) for (IM)C5-H...Cl<sup>-</sup> optimized at the DFT-B3LYP/6-31G\*\* level.

| Vector      | Length         |
|-------------|----------------|
| N1-C2       | 1.367          |
| N1-C5       | 1.380          |
| N3-C2       | 1.317          |
| N3-C4       | 1.385          |
| C4-C5       | 1.375          |
| H1-N1       | 1.008          |
| H2-C2       | 1.083          |
| H4-C4       | 1.081          |
| H5-C5       | 1.099          |
| H5...Cl1    | 2.311          |
| C5...Cl1    | 3.410          |
| Vectors     | Angle          |
| H1-N1-C2    | 127.61         |
| H1-N1-C5    | 124.14         |
| H1-N1-C5    | 99.13          |
| C2-N1-C5    | 108.25         |
| C2-N3-C4    | 104.71         |
| H2-C2-N3    | 125.92         |
| H2-C2-N1    | 122.61         |
| N3-C2-N1    | 111.46         |
| H4-C4-C5    | 127.37         |
| H4-C4-N3    | 121.04         |
| C5-C4-N3    | 111.60         |
| H5-C5-C4    | 136.14         |
| H5-C5-N1    | 119.89         |
| C4-C5-N1    | 103.98         |
| C5-H5...Cl1 | 180.00 (fixed) |

Table 181S. Computed atomic orthogonal coordinates for (IM)C5-H...Cl<sup>-</sup> optimized at the DFT-B3LYP/6-31+G\*\* level.

| Atom | x        | y        | z       |
|------|----------|----------|---------|
| C11  | -0.12926 | -0.28795 | 0.00000 |
| H2   | 0.25975  | 0.23312  | 0.00000 |
| H4   | -0.15716 | 0.19147  | 0.00000 |
| H1   | 0.20488  | -0.01800 | 0.00000 |
| N3   | 0.04725  | 0.25931  | 0.00000 |
| C2   | 0.16010  | 0.19101  | 0.00000 |
| H5   | -0.04047 | -0.06521 | 0.00000 |
| C4   | -0.05279 | 0.16347  | 0.00000 |
| N1   | 0.13654  | 0.05624  | 0.00000 |
| C5   | 0.00000  | 0.03633  | 0.00000 |

Table 182S. Computed bond lengths (Å) and angles (°) for (IM)C5-H...Cl<sup>-</sup> optimized at the DFT-B3LYP/6-31+G\*\* level.

| Vector   | Length |
|----------|--------|
| N1-C2    | 1.368  |
| N1-C5    | 1.380  |
| N3-C2    | 1.319  |
| N3-C4    | 1.385  |
| C4-C5    | 1.377  |
| H1-N1    | 1.009  |
| H2-C2    | 1.082  |
| H4-C4    | 1.081  |
| H5-C5    | 1.093  |
| H5...Cl1 | 2.398  |
| C5...Cl1 | 3.491  |

  

| Vectors     | Angle          |
|-------------|----------------|
| H1-N1-C2    | 127.45         |
| H1-N1-C5    | 124.33         |
| C2-N1-C5    | 108.21         |
| C2-N3-C4    | 105.04         |
| H2-C2-N3    | 125.91         |
| H2-C2-N1    | 122.82         |
| N3-C2-N1    | 111.27         |
| H4-C4-C5    | 127.57         |
| H4-C4-N3    | 121.21         |
| C5-C4-N3    | 111.22         |
| H5-C5-C4    | 135.72         |
| H5-C5-N1    | 120.03         |
| C4-C5-N1    | 104.25         |
| C5-H5...Cl1 | 180.00 (fixed) |

**(IMH<sup>+</sup>)N1...H<sup>+</sup>...Cl<sup>-</sup>**Table 183S. Computed atomic orthogonal coordinates for (IMH<sup>+</sup>)N1...H<sup>+</sup>...Cl<sup>-</sup> optimized at the DFT- B3LYP/6-31+G\*\* level.

| Atom | x        | y        | z       |
|------|----------|----------|---------|
| C11  | -0.03045 | -0.28187 | 0.00000 |
| H4   | -0.08912 | 0.33454  | 0.00000 |
| H3   | 0.16233  | 0.28814  | 0.00000 |
| H5   | -0.20444 | 0.08210  | 0.00000 |
| H1   | -0.01733 | -0.14566 | 0.00000 |
| H2   | 0.21277  | 0.03792  | 0.00000 |
| C4   | -0.04518 | 0.23605  | 0.00000 |
| N3   | 0.09159  | 0.21614  | 0.00000 |
| C5   | -0.10025 | 0.11043  | 0.00000 |
| C2   | 0.11415  | 0.08198  | 0.00000 |
| N1   | 0.00000  | 0.01588  | 0.00000 |

Table 184S. Computed bond lengths (Å) and angles (°) for (IMH<sup>+</sup>)N1...H<sup>+</sup>...Cl<sup>-</sup> optimized at the DFT- B3LYP/6-31+G\*\* level.

| Vector      | Distance |
|-------------|----------|
| N1-C2       | 1.319    |
| N1-C5       | 1.378    |
| N3-C2       | 1.360    |
| N3-C4       | 1.382    |
| C4-C5       | 1.372    |
| H1-Cl1      | 1.368    |
| H2-C2       | 1.080    |
| H3-N3       | 1.009    |
| H4-C4       | 1.078    |
| H5-C5       | 1.080    |
| Cl1-H1      | 1.368    |
| N1...H1     | 1.625    |
| N1...Cl1    | 2.993    |
| Vectors     | Angle    |
| C2-N1-C5    | 106.60   |
| H3-N3-C2    | 125.96   |
| H3-N3-C4    | 126.21   |
| C2-N3-C4    | 107.83   |
| H2-C2-N1    | 125.85   |
| H2-C2-N3    | 123.62   |
| N1-C2-N3    | 110.53   |
| H4-C4-C5    | 132.28   |
| H4-C4-N3    | 122.33   |
| C5-C4-N3    | 105.39   |
| H5-C5-C4    | 128.88   |
| H5-C5-N1    | 121.46   |
| C4-C5-N1    | 109.65   |
| N1...H1-Cl1 | 179.38   |

Table 185S. Computed atomic orthogonal coordinates for (IMH<sup>+</sup>)N1...H<sup>+</sup>...Cl<sup>-</sup> optimized at the *ab initio*- MP2/6-31+G\*\* level.

| Atom | x        | y        | z       |
|------|----------|----------|---------|
| C11  | -0.05807 | -0.28301 | 0.00000 |
| N1   | 0.00000  | 0.01822  | 0.00000 |
| C2   | 0.12130  | 0.07243  | 0.00000 |
| N3   | 0.11298  | 0.20845  | 0.00000 |
| C4   | -0.02026 | 0.24311  | 0.00000 |
| C5   | -0.08876 | 0.12348  | 0.00000 |
| H1   | -0.03466 | -0.15339 | 0.00000 |
| H2   | 0.21463  | 0.01870  | 0.00000 |
| H3   | 0.19100  | 0.27240  | 0.00000 |
| H4   | -0.05311 | 0.34554  | 0.00000 |
| H5   | -0.19519 | 0.10726  | 0.00000 |

Table 186S. Computed bond lengths (Å) and angles (°) for (IMH<sup>+</sup>)N1...H<sup>+</sup>...Cl<sup>-</sup> optimized at the *ab initio*- MP2/6-31+G\*\* level.

| Atom        | Length |
|-------------|--------|
| N1-C2       | 1.329  |
| N1-C5       | 1.377  |
| N3-C2       | 1.363  |
| N3-C4       | 1.377  |
| C4-C5       | 1.379  |
| H1-Cl1      | 1.317  |
| H2-C2       | 1.077  |
| H3-N3       | 1.009  |
| H4-C4       | 1.076  |
| H5-C5       | 1.077  |
| N1...H1     | 1.751  |
| Vectors     | Angle  |
| C2-N1-C5    | 106.06 |
| H3-N3-C2    | 125.84 |
| H3-N3-C4    | 126.08 |
| C2-N3-C4    | 108.08 |
| H2-C2-N1    | 125.99 |
| H2-C2-N3    | 123.43 |
| N1-C2-N3    | 110.58 |
| H4-C4-N3    | 122.36 |
| H4-C4-C5    | 132.42 |
| N3-C4-C5    | 105.21 |
| H5-C5-N1    | 121.47 |
| H5-C5-C4    | 128.46 |
| N1-C5-C4    | 110.07 |
| N1...H1-Cl1 | 178.82 |
| H1...N1-C2  | 125.50 |
| H1...N1-C5  | 128.44 |



**(IM)N1-H...F<sup>-</sup>**Table 187S. Computed atomic orthogonal coordinates for (IM)N1-H...F<sup>-</sup> optimized at the DFT-B3LYP/6-31G\*\* level.

| Atom | x        | y        | z       |
|------|----------|----------|---------|
| F1   | -0.00012 | 0.29280  | 0.00000 |
| H4   | 0.12050  | -0.26714 | 0.00000 |
| H5   | 0.21005  | -0.00553 | 0.00000 |
| H1   | -0.00007 | 0.19264  | 0.00000 |
| H2   | -0.20748 | -0.00932 | 0.00000 |
| N3   | -0.07448 | -0.17627 | 0.00000 |
| C4   | 0.06291  | -0.17499 | 0.00000 |
| C5   | 0.10869  | -0.04423 | 0.00000 |
| C2   | -0.10503 | -0.04562 | 0.00000 |
| N1   | 0.00000  | 0.03959  | 0.00000 |

Table 188S. Computed bond lengths (Å) and angles (°) for (IM)N1-H...F<sup>-</sup> optimized at the DFT-B3LYP/6-31G\*\* level.

| Vector  | Distance |
|---------|----------|
| N1-C2   | 1.352    |
| N1-C5   | 1.373    |
| N3-C3   | 1.342    |
| C4-C5   | 1.385    |
| H1-F1   | 1.002    |
| H2-C2   | 1.087    |
| H4-C4   | 1.087    |
| H5-C5   | 1.085    |
| H1...N1 | 1.531    |
| F1...N1 | 2.532    |

  

| Vectors  | Angle  |
|----------|--------|
| C2-N1-C5 | 103.31 |
| C2-N3-C4 | 102.63 |
| H2-C2-N3 | 122.67 |
| H2-C2-N1 | 121.44 |
| N3-C2-N1 | 115.89 |
| H4-C4-N3 | 121.47 |
| H4-C4-C5 | 128.70 |
| N3-C4-C5 | 109.83 |
| H5-C5-N1 | 121.46 |
| H5-C5-C4 | 130.19 |
| N1-C5-C4 | 108.34 |

**(IM)C2-H...F<sup>-</sup>**Table 189S. Computed atomic orthogonal coordinates for (IM)C2-H...F<sup>-</sup> optimized at the DFT-B3LYP/6-31G\*\* level.

| Atom | x        | y        | z       |
|------|----------|----------|---------|
| F1   | -0.09117 | 0.28335  | 0.00000 |
| H5   | -0.05930 | -0.28198 | 0.00000 |
| H4   | 0.20649  | -0.20505 | 0.00000 |
| H2   | -0.05240 | 0.18167  | 0.00000 |
| H1   | -0.18574 | -0.05869 | 0.00000 |
| C5   | -0.01304 | -0.18415 | 0.00000 |
| C4   | 0.11766  | -0.14239 | 0.00000 |
| N3   | 0.12572  | -0.00457 | 0.00000 |
| N1   | -0.08518 | -0.06575 | 0.00000 |
| C2   | 0.00000  | 0.04422  | 0.00000 |

Table 190S. Computed bond lengths (Å) and angles (°) for (IM)C2-H...F<sup>-</sup> optimized at the DFT-B3LYP/6-31G\*\* level.

| Vector  | Distance |
|---------|----------|
| N1-C5   | 1.386    |
| N1-C2   | 1.391    |
| N3-C2   | 1.349    |
| N3-C4   | 1.381    |
| C4-C5   | 1.372    |
| H1-N1   | 1.008    |
| H2-F1   | 1.088    |
| H4-C4   | 1.087    |
| H5-C5   | 1.082    |
| H2...C2 | 1.471    |
| F1...C2 | 2.559    |

  

| Vectors    | Angle         |
|------------|---------------|
| H1-N1-C2   | 124.22        |
| H1-N1-C5   | 127.47        |
| C2-N1-C5   | 108.32        |
| C2-N1-C2   | 26.46         |
| C2-N3-C4   | 105.57        |
| H2-C2-N3   | 130.58        |
| H2-C2-N1   | 118.83        |
| N3-C2-N1   | 110.59        |
| H4-C4-C5   | 127.55        |
| H4-C4-N3   | 121.34        |
| C5-C4-N3   | 111.12        |
| H5-C5-C4   | 132.93        |
| H5-C5-N1   | 122.66        |
| C4-C5-N1   | 104.40        |
| C2-H2...F1 | 180.00(fixed) |

**TWO-PARTICLE SYSTEMS**  
**Imidazole...Imidazole systems**

**(IM)N1-H...N3'(IM) (coplanar)**

Table 191S. Computed atomic orthogonal coordinates for (IM)N1-H...N3'(IM) (coplanar) optimized at the DFT- B3LYP/6-31+G\*\* level.

| Atom | x        | y        | z       |
|------|----------|----------|---------|
| N1   | -0.00511 | 0.15664  | 0.00000 |
| N3   | -0.09213 | 0.36186  | 0.00000 |
| N1'  | 0.08120  | -0.35339 | 0.00000 |
| N3'  | 0.00808  | -0.14450 | 0.00000 |
| C2   | -0.11850 | 0.23241  | 0.00000 |
| C4   | 0.04536  | 0.37019  | 0.00000 |
| C5   | 0.10120  | 0.24430  | 0.00000 |
| C2'  | 0.11528  | -0.22139 | 0.00000 |
| C4'  | -0.09981 | -0.23057 | 0.00000 |
| C5'  | -0.05668 | -0.36087 | 0.00000 |
| H1   | 0.00000  | 0.05414  | 0.00000 |
| H2   | -0.21738 | 0.18865  | 0.00000 |
| H4   | 0.09606  | 0.46567  | 0.00000 |
| H5   | 0.20372  | 0.21050  | 0.00000 |
| H1'  | 0.14523  | -0.43142 | 0.00000 |
| H2'  | 0.21785  | -0.18738 | 0.00000 |
| H4'  | -0.20141 | -0.19391 | 0.00000 |
| H5'  | -0.10945 | -0.45495 | 0.00000 |

Table 192S. Computed bond lengths (Å) and angles (°) for (IM)N1-H...N3'(IM) (coplanar) optimized at the DFT- B3LYP/6-31+G\*\* level.

| Vector      | Distance |
|-------------|----------|
| N1'-C2'     | 1.363    |
| N1'-C5'     | 1.381    |
| N1-C2       | 1.364    |
| N1-C5       | 1.378    |
| N3-C2       | 1.321    |
| N3-C4       | 1.377    |
| N3'-C2'     | 1.319    |
| N3'-C4'     | 1.380    |
| C4-C5       | 1.377    |
| C4'-C5'     | 1.373    |
| H1-N1       | 1.026    |
| H1'-N1'     | 1.009    |
| H2-C2       | 1.081    |
| H2'-C2'     | 1.081    |
| H4-C4       | 1.081    |
| H4'-C4'     | 1.080    |
| H5'-C5'     | 1.079    |
| H5-C5       | 1.079    |
| N3'...H1    | 1.988    |
| N3'...N1    | 3.014    |
| Vectors     | Angle    |
| H1'-N1'-C2' | 126.15   |
| H1'-N1'-C5' | 126.27   |
| C2'-N1'-C5' | 107.58   |
| H1-N1-C2    | 126.61   |
| H1-N1-C5    | 126.65   |
| C2-N1-C5    | 106.74   |
| C2-N3-C4    | 104.98   |
| C2'-N3'-C4' | 105.77   |
| H2'-C2'-N3' | 126.01   |
| H2'-C2'-N1' | 122.82   |
| N3'-C2'-N1' | 111.17   |

|              |        |
|--------------|--------|
| H2-C2-N3     | 125.39 |
| H2-C2-N1     | 122.38 |
| N3-C2-N1     | 112.24 |
| H4-C4-C5     | 128.11 |
| H4-C4-N3     | 121.44 |
| C5-C4-N3     | 110.45 |
| H4'-C4'-C5'  | 128.16 |
| H4'-C4'-N3'  | 121.58 |
| C5'-C4'-N3'  | 110.27 |
| H5'-C5'-C4'  | 132.40 |
| H5'-C5'-N1'  | 122.39 |
| C4'-C5'-N1'  | 105.21 |
| H5-C5-C4     | 132.17 |
| H5-C5-N1     | 122.25 |
| C4-C5-N1     | 105.59 |
| N3'...H1-N1  | 179.48 |
| H1...N3'-C2' | 127.98 |
| H1...N3'-C4' | 126.25 |

---

**(IM)N1-H...N3'(IM) (free)**

Table 193S. Computed atomic orthogonal coordinates for (IM)N1-H...N3'(IM) (free) optimized at the DFT- B3LYP/6-31+G\*\* level.

| Atom | x        | y        | z        |
|------|----------|----------|----------|
| N1   | 0.15542  | 0.00028  | 0.00070  |
| C2   | 0.23693  | -0.02005 | -0.10677 |
| N3   | 0.36485  | -0.01417 | -0.07424 |
| C4   | 0.36603  | 0.01126  | 0.06116  |
| C5   | 0.23744  | 0.02059  | 0.10956  |
| N1'  | -0.35412 | -0.06581 | 0.01225  |
| C2'  | -0.22309 | -0.10279 | 0.01905  |
| N3'  | -0.14348 | 0.00075  | 0.00031  |
| C4'  | -0.22659 | 0.10914  | -0.01942 |
| C5'  | -0.35796 | 0.07004  | -0.01240 |
| H1   | 0.05274  | 0.00043  | 0.00049  |
| H2   | 0.19819  | -0.03863 | -0.20600 |
| H5   | 0.19815  | 0.03922  | 0.20836  |
| H4   | 0.45877  | 0.02136  | 0.11580  |
| H1'  | -0.43382 | -0.12675 | 0.02326  |
| H2'  | -0.19160 | -0.20449 | 0.03753  |
| H4'  | -0.18703 | 0.20804  | -0.03734 |
| H5'  | -0.45065 | 0.12432  | -0.02231 |



Table 194S. Computed bond lengths (Å) and angles (°) for (IM)N1-H...N3'(IM) (free) optimized at the DFT- B3LYP/6-31+G\*\* level.

| Vector      | Length |
|-------------|--------|
| N1-C2       | 1.364  |
| N1-C5       | 1.378  |
| N1'-C2'     | 1.363  |
| N1'-C5'     | 1.381  |
| N3-C2       | 1.321  |
| N3-C4       | 1.378  |
| N3'-C2'     | 1.319  |
| N3'-C4'     | 1.380  |
| C4'-C5'     | 1.372  |
| C4-C5       | 1.377  |
| H1'-N1'     | 1.009  |
| H1-N1       | 1.027  |
| H2-C2       | 1.081  |
| H2'-C2'     | 1.081  |
| H4'-C4'     | 1.080  |
| H4-C4       | 1.081  |
| H5'-C5'     | 1.079  |
| H5-C5       | 1.079  |
| H1...N3'    | 1.962  |
| N1...N3'    | 2.989  |
| Vectors     | Angle  |
| H1-N1-C2    | 126.59 |
| H1-N1-C5    | 126.63 |
| C2-N1-C5    | 106.78 |
| H1'-N1'-C2' | 126.14 |
| H1'-N1'-C5' | 126.25 |
| C2'-N1'-C5' | 107.60 |
| C2-N3-C4    | 104.98 |
| C2'-N3'-C4' | 105.86 |
| H2'-C2'-N3' | 125.95 |
| H2'-C2'-N1' | 122.95 |
| N3'-C2'-N1' | 111.10 |

---

|             |        |
|-------------|--------|
| H2-C2-N3    | 125.48 |
| H2-C2-N1    | 122.31 |
| N3-C2-N1    | 112.21 |
| H4'-C4'-C5' | 128.31 |
| H4'-C4'-N3' | 121.49 |
| C5'-C4'-N3' | 110.21 |
| H4-C4-C5    | 128.10 |
| H4-C4-N3    | 121.42 |
| C5-C4-N3    | 110.48 |
| H5'-C5'-C4' | 132.41 |
| H5'-C5'-N1' | 122.36 |
| C4'-C5'-N1' | 105.23 |
| H5-C5-C4    | 132.32 |
| H5-C5-N1    | 122.13 |
| C4-C5-N1    | 105.55 |
| N1-H1...N3' | 179.93 |

---

**(IM)C2-H...N3'(IM)**

Table 195S. Computed atomic orthogonal coordinates for (IM)C2-H...N3'(IM) optimized at the DFT- B3LYP/6-31+G\*\* level.

| Atom | x        | y        | z       |
|------|----------|----------|---------|
| H5'  | -0.08890 | -0.44173 | 0.00000 |
| H4   | -0.25417 | 0.40190  | 0.00000 |
| C5'  | -0.01981 | -0.35887 | 0.00000 |
| C4   | -0.16262 | 0.34444  | 0.00000 |
| H4'  | -0.13142 | -0.16804 | 0.00000 |
| H1'  | 0.16582  | -0.46524 | 0.00000 |
| N3   | -0.16424 | 0.20652  | 0.00000 |
| C4'  | -0.03822 | -0.22277 | 0.00000 |
| N1'  | 0.11717  | -0.37685 | 0.00000 |
| H5   | 0.00812  | 0.49098  | 0.00000 |
| C5   | -0.03342 | 0.39138  | 0.00000 |
| C2   | -0.03757 | 0.16959  | 0.00000 |
| H2   | 0.00000  | 0.06805  | 0.00000 |
| N3'  | 0.08349  | -0.15760 | 0.00000 |
| C2'  | 0.17456  | -0.25282 | 0.00000 |
| N1   | 0.04570  | 0.27813  | 0.00000 |
| H2'  | 0.28167  | -0.23829 | 0.00000 |
| H1   | 0.14653  | 0.27526  | 0.00000 |

Table 196S. Computed bond lengths (Å) and angles (°) for (IM)C2-H...N3'(IM) optimized at the DFT- B3LYP/6-31+G\*\* level.

| Vector   | Length |
|----------|--------|
| N1'-C2'  | 1.367  |
| N1'-C5'  | 1.382  |
| N1-C2    | 1.368  |
| N1-C5    | 1.382  |
| N3-C2    | 1.319  |
| N3-C4    | 1.379  |
| N3'-C2'  | 1.318  |
| N3'-C4'  | 1.381  |
| C4-C5    | 1.375  |
| C4'-C5'  | 1.373  |
| H1'-N1'  | 1.009  |
| H1-N1    | 1.009  |
| H2-C2    | 1.083  |
| H2'-C2'  | 1.081  |
| H4-C4    | 1.081  |
| H4'-C4'  | 1.081  |
| H5'-C5'  | 1.079  |
| H5-C5    | 1.079  |
| H2...N3' | 2.406  |
| C2...N3' | 3.489  |

  

| Vectors     | Angle  |
|-------------|--------|
| H1'-N1'-C2' | 126.34 |
| H1'-N1'-C5' | 126.31 |
| C2'-N1'-C5' | 107.35 |
| H1-N1-C2    | 125.86 |
| H1-N1-C5    | 126.57 |
| C2-N1-C5    | 107.57 |
| C2-N3-C4    | 105.58 |
| C2'-N3'-C4' | 105.56 |
| H2'-C2'-N3' | 126.00 |
| H2'-C2'-N1' | 122.56 |
| N3'-C2'-N1' | 111.45 |

---

|              |               |
|--------------|---------------|
| H2-C2-N3     | 126.56        |
| H2-C2-N1     | 122.20        |
| N3-C2-N1     | 111.24        |
| H4-C4-C5     | 127.92        |
| H4-C4-N3     | 121.44        |
| C5-C4-N3     | 110.64        |
| H4'-C4'-C5'  | 128.13        |
| H4'-C4'-N3'  | 121.41        |
| C5'-C4'-N3'  | 110.46        |
| H5-C5-C4     | 132.61        |
| H5-C5-N1     | 122.42        |
| C4-C5-N1     | 104.97        |
| H5'-C5'-C4'  | 132.47        |
| H5'-C5'-N1'  | 122.34        |
| C4'-C5'-N1'  | 105.18        |
| C2-H2...N3'  | 180.00(fixed) |
| H2...N3'-C2' | 156.58        |
| H2...N3'-C4' | 97.86         |

---

**TWO-PARTICLE SYSTEMS****Pyrimidine...Cl<sup>-</sup> systems****(PYM)C2-H...Cl<sup>-</sup>**Table 197S. Computed atomic orthogonal coordinates for (PYM)C2-H...Cl<sup>-</sup> optimized at the DFT-B3LYP/6-31+G\*\* level.

| Atom | x        | y        | z       |
|------|----------|----------|---------|
| C11  | -0.00033 | -0.34778 | 0.00000 |
| H5   | 0.00038  | 0.38595  | 0.00000 |
| H6   | 0.21558  | 0.25256  | 0.00000 |
| H4   | -0.21509 | 0.25298  | 0.00000 |
| H2   | -0.00010 | -0.10225 | 0.00000 |
| C5   | 0.00027  | 0.27734  | 0.00000 |
| C6   | 0.11838  | 0.20313  | 0.00000 |
| C4   | -0.11799 | 0.20336  | 0.00000 |
| N3   | -0.11953 | 0.06977  | 0.00000 |
| N1   | 0.11965  | 0.06954  | 0.00000 |
| C2   | 0.00000  | 0.00748  | 0.00000 |

Table 198S. Computed bond lengths (Å) and angles (°) for (PYM)C2-H...Cl<sup>-</sup> optimized at the DFT- B3LYP/6-31+G\*\* level.

| Vector      | Length        |
|-------------|---------------|
| N1-C6       | 1.336         |
| N1-C2       | 1.348         |
| N3-C4       | 1.336         |
| N3-C2       | 1.348         |
| C2-H2       | 1.097         |
| C4-H4       | 1.090         |
| C4-C5       | 1.395         |
| C5-H5       | 1.086         |
| C5-C6       | 1.395         |
| C6-H6       | 1.090         |
| H2...Cl1    | 2.455         |
| C2...Cl1    | 2.553         |
| Vectors     | Angle         |
| C6-N1-C2    | 116.87        |
| C4-N3-C2    | 116.86        |
| H2-C2-N1    | 117.47        |
| H2-C2-N3    | 117.47        |
| N1-C2-N3    | 125.06        |
| H4-C4-N3    | 116.41        |
| H4-C4-C5    | 120.90        |
| N3-C4-C5    | 122.69        |
| H5-C5-C4    | 122.09        |
| H5-C5-C6    | 122.08        |
| C4-C5-C6    | 115.83        |
| H6-C6-N1    | 116.41        |
| H6-C6-C5    | 120.90        |
| N1-C6-C5    | 122.69        |
| C2-H2...Cl1 | 180.0 (fixed) |

Table 199S. Computed atomic orthogonal coordinates for (PYM)C2-H...Cl<sup>-</sup> optimized at the DFT-B3LYP/6-31+G\*\* level. The C2-H...Cl angle was fixed at 140°.

---

| Atom | x        | y        | z       |
|------|----------|----------|---------|
| C11  | 0.32767  | -0.09312 | 0.00000 |
| H5   | -0.37702 | 0.01906  | 0.00000 |
| H4   | -0.26077 | 0.24408  | 0.00000 |
| H6   | -0.22755 | -0.18539 | 0.00000 |
| C5   | -0.26873 | 0.02746  | 0.00000 |
| C4   | -0.20409 | 0.15094  | 0.00000 |
| H2   | 0.10887  | 0.05763  | 0.00000 |
| C6   | -0.18565 | -0.08473 | 0.00000 |
| N3   | -0.07086 | 0.16224  | 0.00000 |
| N1   | -0.05243 | -0.07625 | 0.00000 |
| C2   | 0.00000  | 0.04728  | 0.00000 |

---



Table 200S. Computed bond lengths (Å) and angles (°) for (PYM)C2-H... Cl<sup>-</sup> optimized at the DFT- B3LYP/6-31+G\*\* level. The C2-H...Cl angle was fixed at 140°.

| Vector      | Distance      |
|-------------|---------------|
| N1-C6       | 1.335         |
| N1-C2       | 1.342         |
| N3-C4       | 1.337         |
| N3-C2       | 1.350         |
| C4-C5       | 1.394         |
| C5-C6       | 1.396         |
| H2-C2       | 1.094         |
| H4-C4       | 1.090         |
| H5-C5       | 1.086         |
| H6-C6       | 1.090         |
| C11...H2    | 2.657         |
| C11...C2    | 3.500         |
| Vectors     | Angle         |
| C6-N1-C2    | 116.64        |
| C4-N3-C2    | 116.80        |
| H2-C2-N1    | 118.43        |
| H2-C2-N3    | 116.22        |
| N1-C2-N3    | 125.35        |
| H4-C4-N3    | 116.47        |
| H4-C4-C5    | 121.05        |
| N3-C4-C5    | 122.48        |
| H5-C5-C4    | 122.07        |
| H5-C5-C6    | 122.09        |
| C4-C5-C6    | 115.85        |
| H6-C6-N1    | 116.24        |
| H6-C6-C5    | 120.88        |
| N1-C6-C5    | 122.88        |
| C11...H2-C2 | 140.00(fixed) |

**(PYM)C5-H...Cl<sup>-</sup>**Table 201S. Computed atomic orthogonal coordinates for (PYM)C5-H...Cl<sup>-</sup> optimized at the DFT-B3LYP/6-31+G\*\* level.

| Atom | x        | y        | z       |
|------|----------|----------|---------|
| C11  | -0.00142 | -0.34332 | 0.00000 |
| N1   | 0.12076  | 0.21060  | 0.00000 |
| C2   | 0.00112  | 0.27054  | 0.00000 |
| N3   | -0.11901 | 0.21161  | 0.00000 |
| C4   | -0.11770 | 0.07707  | 0.00000 |
| C5   | 0.00000  | 0.00224  | 0.00000 |
| C6   | 0.11833  | 0.07609  | 0.00000 |
| H2   | 0.00158  | 0.37945  | 0.00000 |
| H4   | -0.21460 | 0.02761  | 0.00000 |
| H5   | -0.00045 | -0.10756 | 0.00000 |
| H6   | 0.21480  | 0.02580  | 0.00000 |

Table 202S. Computed bond lengths (Å) and angles (°) for (PYM)C5-H...Cl<sup>-</sup> optimized at the DFT- B3LYP/6-31+G\*\* level.

| Vector   | Length |
|----------|--------|
| N1-C2    | 1.338  |
| N1-C6    | 1.345  |
| N3-C2    | 1.338  |
| N3-C4    | 1.345  |
| C4-C5    | 1.395  |
| C5-C6    | 1.395  |
| H2-C2    | 1.089  |
| H4-C4    | 1.088  |
| H5-C5    | 1.098  |
| H6-C6    | 1.088  |
| H5...Cl1 | 2.358  |
| C5...Cl1 | 3.456  |

  

| Vectors     | Angle  |
|-------------|--------|
| C2-N1-C6    | 115.58 |
| C2-N3-C4    | 115.57 |
| H2-C2-N1    | 116.37 |
| H2-C2-N3    | 116.37 |
| N1-C2-N3    | 127.26 |
| H4-C4-N3    | 116.48 |
| H4-C4-C5    | 120.51 |
| N3-C4-C5    | 123.00 |
| H5-C5-C4    | 122.21 |
| H5-C5-C6    | 122.20 |
| C6-C5-C4    | 115.58 |
| H6-C6-N1    | 116.50 |
| H6-C6-C5    | 120.50 |
| N1-C6-C5    | 123.00 |
| C5-H5...Cl1 | 180.00 |

**(PYM)C6-H...Cl<sup>-</sup>**Table 203S. Computed atomic orthogonal coordinates for (PYM)C6-H...Cl<sup>-</sup> optimized at the DFT-B3LYP/6-31+G\*\* level.

| Atom | x        | y        | z       |
|------|----------|----------|---------|
| C11  | 0.20595  | -0.27645 | 0.00000 |
| N1   | 0.05526  | 0.12766  | 0.00000 |
| C2   | -0.02945 | 0.23109  | 0.00000 |
| N3   | -0.16342 | 0.22752  | 0.00000 |
| C4   | -0.21719 | 0.10433  | 0.00000 |
| C5   | -0.13925 | -0.01076 | 0.00000 |
| C6   | 0.00000  | 0.00493  | 0.00000 |
| H2   | 0.01559  | 0.33027  | 0.00000 |
| H4   | -0.32604 | 0.09929  | 0.00000 |
| H5   | -0.18316 | -0.11001 | 0.00000 |
| H6   | 0.06489  | -0.08372 | 0.00000 |

Table 204S. Computed bond lengths (Å) and angles (°) for (PYM)C6-H...Cl<sup>-</sup> optimized at the DFT- B3LYP/6-31+G\*\* level.

| Vector   | Length |
|----------|--------|
| N1-C2    | 1.337  |
| N1-C6    | 1.346  |
| N3-C2    | 1.340  |
| N3-C4    | 1.344  |
| C4-C5    | 1.390  |
| C5-C6    | 1.401  |
| H2-C2    | 1.089  |
| H4-C4    | 1.090  |
| H5-C5    | 1.085  |
| H6-C6    | 1.099  |
| H6...Cl1 | 2.388  |
| C6...Cl1 | 3.456  |

  

| Vectors     | Angle  |
|-------------|--------|
| C2-N1-C6    | 116.44 |
| C2-N3-C4    | 115.11 |
| H2-C2-N1    | 116.26 |
| H2-C2-N3    | 115.95 |
| N1-C2-N3    | 127.79 |
| H4-C4-N3    | 116.23 |
| H4-C4-C5    | 121.46 |
| N3-C4-C5    | 122.31 |
| H5-C5-C4    | 122.03 |
| H5-C5-C6    | 120.29 |
| C6-C5-C4    | 117.68 |
| H6-C6-N1    | 119.56 |
| H6-C6-C5    | 119.77 |
| N1-C6-C5    | 120.67 |
| C6-H6...Cl1 | 180.00 |

Table 205S. Computed atomic orthogonal coordinates for (PYM)C6-H...Cl<sup>-</sup> optimized at the DFT-B3LYP/6-31+G\*\* level. The C6-H...Cl angle was fixed at 140.0°.

---

| Atom | x        | y        | z       |
|------|----------|----------|---------|
| C11  | 0.32767  | -0.09312 | 0.00000 |
| H5   | -0.37702 | 0.01906  | 0.00000 |
| H4   | -0.26077 | 0.24408  | 0.00000 |
| H6   | -0.22755 | -0.18539 | 0.00000 |
| C5   | -0.26873 | 0.02746  | 0.00000 |
| C4   | -0.20409 | 0.15094  | 0.00000 |
| H2   | 0.10887  | 0.05763  | 0.00000 |
| C6   | -0.18565 | -0.08473 | 0.00000 |
| N3   | -0.07086 | 0.16224  | 0.00000 |
| N1   | -0.05243 | -0.07625 | 0.00000 |
| C2   | 0.00000  | 0.04728  | 0.00000 |

---

Table 206S. Computed bond lengths (Å) and angles (°) for (PYM)C6-H... Cl<sup>-</sup> optimized at the DFT- B3LYP/6-31+G\*\* level. The C6-H...Cl angle was fixed at 140.0°.

| Vector      | Distance      |
|-------------|---------------|
| N1-C2       | 1.335         |
| N1-C6       | 1.342         |
| N3-C2       | 1.342         |
| N3-C4       | 1.342         |
| C4-C5       | 1.391         |
| C5-C4       | 1.391         |
| C5-C6       | 1.403         |
| H2-C2       | 1.089         |
| H4-C4       | 1.090         |
| H5-C5       | 1.086         |
| C11...H6    | 2.560         |
| C11...C6    | 3.472         |
| Vectors     | Angle         |
| C2-N1-C6    | 116.42        |
| C2-N3-C4    | 115.00        |
| H2-C2-N1    | 116.15        |
| H2-C2-N3    | 115.88        |
| N1-C2-N3    | 127.97        |
| H4-C4-N3    | 116.37        |
| H4-C4-C5    | 121.44        |
| N3-C4-C5    | 122.19        |
| H5-C5-C4    | 121.41        |
| H5-C5-C6    | 120.79        |
| C4-C5-C6    | 117.80        |
| H6-C6-N1    | 119.54        |
| H6-C6-C5    | 119.83        |
| N1-C6-C5    | 120.62        |
| C11...H6-C6 | 140.00(fixed) |

**(MePYM)C-H...Cl<sup>-</sup>**Table 207S. Computed atomic orthogonal coordinates for (MePYM)C-H...Cl<sup>-</sup> optimized at the DFT- B3LYP/6-31G\*\* level.

| Atom | x        | y        | z        |
|------|----------|----------|----------|
| C11  | -0.35265 | -0.03693 | -0.00003 |
| N1   | 0.27037  | -0.10289 | -0.00002 |
| C2   | 0.27903  | 0.03052  | -0.00004 |
| N3   | 0.17949  | 0.11958  | -0.00003 |
| C4   | 0.05416  | 0.06949  | 0.00002  |
| C5   | 0.03248  | -0.06934 | 0.00005  |
| C6   | 0.14473  | -0.15098 | 0.00003  |
| C7   | -0.06392 | 0.16234  | 0.00004  |
| H2   | 0.38005  | 0.07176  | -0.00008 |
| H5   | -0.06959 | -0.10759 | 0.00009  |
| H6   | 0.13474  | -0.25951 | 0.00005  |
| H7a  | -0.15447 | 0.09984  | 0.00002  |
| H7b  | -0.06179 | 0.22713  | 0.08841  |
| H7c  | -0.06178 | 0.22719  | -0.08828 |



Table 208S. Computed bond lengths (Å) and angles (°) for (MePYM)C-H...Cl<sup>-</sup> optimized at the DFT- B3LYP/6-31G\*\* level.

| Vector    | Length |
|-----------|--------|
| N1-C2     | 1.337  |
| N1-C6     | 1.345  |
| N3-C2     | 1.336  |
| N3-C4     | 1.350  |
| C4-C5     | 1.405  |
| C4-C7     | 1.502  |
| C5-C6     | 1.388  |
| H2-C2     | 1.091  |
| H5-C5     | 1.090  |
| H6-C6     | 1.090  |
| H7a-C7    | 1.100  |
| H7b-C7    | 1.096  |
| H7c-C7    | 1.096  |
| H7a...Cl1 | 2.408  |
| C7...Cl1  | 3.508  |
| H5...Cl1  | 2.917  |
| C5...Cl1  | 3.865  |
| Vectors   | Angle  |
| C2-N1-C6  | 114.66 |
| C2-N3-C4  | 116.40 |
| H2-C2-N3  | 115.97 |
| H2-C2-N1  | 115.92 |
| N3-C2-N1  | 128.11 |
| N3-C4-C5  | 120.66 |
| N3-C4-C7  | 120.04 |
| C5-C4-C7  | 119.30 |
| H5-C5-C6  | 123.43 |
| H5-C5-C4  | 119.42 |
| C6-C5-C4  | 117.15 |
| H6-C6-N1  | 116.20 |
| H6-C6-C5  | 120.77 |
| N1-C6-C5  | 123.03 |

---

|              |               |
|--------------|---------------|
| H7b-C7-H7c   | 107.43        |
| H7b-C7-H7a   | 110.61        |
| H7b-C7-C4    | 110.50        |
| H7c-C7-H7a   | 110.61        |
| H7c-C7-C4    | 110.51        |
| H7a-C7-C4    | 107.21        |
| C7-H7a...Cl1 | 180.00(fixed) |
| C5-H5...Cl1  | 145.44        |

---

**TWO-PARTICLE SYSTEMS**  
**Pyrimidine...Pyrimidine systems**

**PYM...PYM**  
**(PYM)C2-H...N1'(PYM)/(PYM)C6'-H...N3(PYM)**

Table 209S. Computed atomic orthogonal coordinates for (PYM)C2-H...N1'(PYM)/(PYM)C6'-H...N3(PYM) optimized at the DFT- B3LYP/6-31G\*\* level.

| Atom | x        | y        | z       |
|------|----------|----------|---------|
| H5   | 0.48543  | -0.18210 | 0.00000 |
| H4'  | -0.36302 | 0.37181  | 0.00000 |
| H6   | 0.33541  | -0.38539 | 0.00000 |
| C5   | 0.37736  | -0.17292 | 0.00000 |
| N3'  | -0.38184 | 0.16585  | 0.00000 |
| C4'  | -0.30820 | 0.27774  | 0.00000 |
| C6   | 0.29411  | -0.28465 | 0.00000 |
| H5'  | -0.11055 | 0.36696  | 0.00000 |
| H4   | 0.37202  | 0.04356  | 0.00000 |
| H2'  | -0.37161 | -0.04040 | 0.00000 |
| C5'  | -0.16894 | 0.27555  | 0.00000 |
| C4   | 0.31432  | -0.04876 | 0.00000 |
| N1   | 0.16063  | -0.27484 | 0.00000 |
| C2'  | -0.31293 | 0.05126  | 0.00000 |
| C2   | 0.11093  | -0.15055 | 0.00000 |
| N3   | 0.18104  | -0.03616 | 0.00000 |
| C6'  | -0.10819 | 0.15011  | 0.00000 |
| N1'  | -0.17998 | 0.03673  | 0.00000 |
| H2   | 0.00262  | -0.14004 | 0.00000 |
| H6'  | 0.00000  | 0.13795  | 0.00000 |

Table 210S. Computed bond lengths (Å) and angles (°) for (PYM)C2-H...N1'(PYM)/(PYM)C6'-H...N3(PYM) optimized at the DFT- B3LYP/6-31G\*\* level.

| Vector      | Length |
|-------------|--------|
| N1-C6       | 1.338  |
| N1-C2       | 1.339  |
| N1'-C2'     | 1.337  |
| N1'-C6'     | 1.342  |
| N3-C4       | 1.339  |
| N3-C2       | 1.342  |
| N3'-C2'     | 1.337  |
| N3'-C4'     | 1.339  |
| C4-C5       | 1.392  |
| C4'-C5'     | 1.393  |
| C5-C6       | 1.393  |
| C5'-C6'     | 1.394  |
| H2'-C2'     | 1.088  |
| H2-C2       | 1.088  |
| H4'-C4'     | 1.089  |
| H4-C4       | 1.089  |
| H5-C5       | 1.085  |
| H5'-C5'     | 1.085  |
| H6-C6       | 1.089  |
| H6'-C6'     | 1.089  |
| H2...N1'    | 2.541  |
| C2...N1'    | 3.460  |
| H6'...N3    | 2.512  |
| C6'...N3    | 3.440  |
| Vectors     | Angle  |
| C6-N1-C2    | 116.00 |
| C2'-N1'-C6' | 116.10 |
| C4-N3-C2    | 116.10 |
| C2'-N3'-C4' | 115.63 |
| H2'-C2'-N3' | 116.35 |
| H2'-C2'-N1' | 116.39 |
| N3'-C2'-N1' | 127.26 |

---

|              |        |
|--------------|--------|
| H2-C2-N1     | 117.34 |
| H2-C2-N3     | 115.96 |
| N1-C2-N3     | 126.70 |
| H4-C4-N3     | 116.60 |
| H4-C4-C5     | 121.08 |
| N3-C4-C5     | 122.32 |
| H4'-C4'-N3'  | 116.42 |
| H4'-C4'-C5'  | 121.13 |
| N3'-C4'-C5'  | 122.45 |
| H5-C5-C4     | 121.77 |
| H5-C5-C6     | 121.83 |
| C4-C5-C6     | 116.39 |
| H5'-C5'-C4'  | 121.67 |
| H5'-C5'-C6'  | 121.59 |
| C4'-C5'-C6'  | 116.74 |
| H6-C6-N1     | 116.50 |
| H6-C6-C5     | 121.02 |
| N1-C6-C5     | 122.49 |
| H6'-C6'-N1'  | 115.93 |
| H6'-C6'-C5'  | 122.25 |
| N1'-C6'-C5'  | 121.82 |
| C2-H2...N1'  | 141.47 |
| C6'-H6'...N3 | 142.53 |

---

Table 211S. Computed atomic orthogonal coordinates for (PYM)C2-H...N1'(PYM)/(PYM)C6'-H...N3(PYM) optimized at the DFT- B3LYP/6-31+G\*\* level.

| Atom | x        | y        | z       |
|------|----------|----------|---------|
| H5   | 0.48252  | -0.20261 | 0.00000 |
| H4'  | -0.34654 | 0.39080  | 0.00000 |
| H6   | 0.32445  | -0.40019 | 0.00000 |
| C5   | 0.37485  | -0.18929 | 0.00000 |
| N3'  | -0.37907 | 0.18654  | 0.00000 |
| C4   | -0.29811 | 0.29335  | 0.00000 |
| C6   | 0.28735  | -0.29789 | 0.00000 |
| H2'  | -0.38319 | -0.02005 | 0.00000 |
| H5'  | -0.09460 | 0.36867  | 0.00000 |
| H4   | 0.37767  | 0.02747  | 0.00000 |
| C4   | 0.31663  | -0.06263 | 0.00000 |
| C2'  | -0.31837 | 0.06726  | 0.00000 |
| C5'  | -0.15921 | 0.28150  | 0.00000 |
| N1   | 0.15429  | -0.28269 | 0.00000 |
| C2   | 0.10920  | -0.15657 | 0.00000 |
| N3   | 0.18381  | -0.04501 | 0.00000 |
| N1'  | -0.18659 | 0.04382  | 0.00000 |
| C6'  | -0.10715 | 0.15207  | 0.00000 |
| H2   | 0.00138  | -0.14249 | 0.00000 |
| H6'  | 0.00000  | 0.13297  | 0.00000 |

Table 212S. Computed bond lengths (Å) and angles (°) for (PYM)C2-H...N1'(PYM)/(PYM)C6'-H...N3(PYM) optimized at the DFT- B3LYP/6-31+G\*\* level.

| Vector      | Length |
|-------------|--------|
| N1'-C2'     | 1.338  |
| N1'-C6'     | 1.343  |
| N1-C2       | 1.339  |
| N1-C6       | 1.342  |
| N3'-C2'     | 1.338  |
| N3'-C4'     | 1.340  |
| N3-C4       | 1.340  |
| N3-C2       | 1.342  |
| C4'-C5'     | 1.394  |
| C4-C5       | 1.394  |
| C5'-C6'     | 1.395  |
| C5-C6       | 1.395  |
| H2'-C2'     | 1.087  |
| H2-C2       | 1.087  |
| H4'-C4'     | 1.088  |
| H4-C4       | 1.088  |
| H5'-C5'     | 1.085  |
| H5-C5       | 1.085  |
| H6'-C6'     | 1.088  |
| H6-C6       | 1.088  |
| H2...N1'    | 2.647  |
| C2...N1'    | 3.573  |
| H6'...N3    | 2.559  |
| C6'...N3    | 3.514  |
| Vectors     | Angle  |
| C2'-N1'-C6' | 116.19 |
| C2-N1-C6    | 116.19 |
| C2'-N3'-C4' | 115.87 |
| C4-N3-C2    | 116.22 |
| H2-C2-N1    | 117.11 |
| H2-C2-N3    | 116.33 |
| N1-C2-N3    | 126.55 |

|              |        |
|--------------|--------|
| H2'-C2'-N1'  | 116.50 |
| H2'-C2'-N3'  | 116.44 |
| N1'-C2'-N3'  | 127.06 |
| H4'-C4'-N3'  | 116.41 |
| H4'-C4'-C5'  | 121.30 |
| N3'-C4'-C5'  | 122.29 |
| H4-C4-N3     | 116.56 |
| H4-C4-C5     | 121.20 |
| N3-C4-C5     | 122.24 |
| H5'-C5'-C4'  | 121.67 |
| H5'-C5'-C6'  | 121.54 |
| C4'-C5'-C6'  | 116.79 |
| H5-C5-C4     | 121.74 |
| H5-C5-C6     | 121.81 |
| C4-C5-C6     | 116.46 |
| H6'-C6'-N1'  | 116.17 |
| H6'-C6'-C5'  | 122.02 |
| N1'-C6'-C5'  | 121.82 |
| H6-C6-N1     | 116.45 |
| H6-C6-C5     | 121.21 |
| N1-C6-C5     | 122.34 |
| C2-H2...N1'  | 142.69 |
| H2...N1'-C2' | 145.34 |
| H2...N1'-C6' | 98.47  |
| C6'-H6'...N3 | 146.03 |
| H6'...N3-C2  | 100.03 |
| H6'...N3-C4  | 143.48 |

---



**(PYM)C2-H...N1'(PYM)**

Table 213S. Computed atomic orthogonal coordinates for (PYM)C2-H...N1'(PYM) optimized at the DFT- B3LYP/6-31+G\*\* level.

| Atom | x        | y        | z       |
|------|----------|----------|---------|
| H5   | 0.00230  | 0.55754  | 0.00000 |
| H4'  | -0.01593 | -0.55542 | 0.00000 |
| H5'  | 0.20845  | -0.43855 | 0.00000 |
| H4   | 0.21714  | 0.42400  | 0.00000 |
| H6   | -0.21383 | 0.42607  | 0.00000 |
| C5   | 0.00178  | 0.44904  | 0.00000 |
| C4'  | -0.00851 | -0.44686 | 0.00000 |
| C5'  | 0.11538  | -0.38282 | 0.00000 |
| N3'  | -0.12414 | -0.37917 | 0.00000 |
| C4   | 0.11995  | 0.37501  | 0.00000 |
| C6   | -0.11711 | 0.37615  | 0.00000 |
| H2'  | -0.20714 | -0.18977 | 0.00000 |
| H6'  | 0.20550  | -0.18541 | 0.00000 |
| N3   | 0.12056  | 0.24107  | 0.00000 |
| N1   | -0.11902 | 0.24224  | 0.00000 |
| C2'  | -0.11392 | -0.24573 | 0.00000 |
| C6'  | 0.11345  | -0.24341 | 0.00000 |
| C2   | 0.00045  | 0.18132  | 0.00000 |
| N1'  | -0.00103 | -0.17374 | 0.00000 |
| H2   | 0.00000  | 0.07251  | 0.00000 |

Table 214S. Computed bond lengths (Å) and angles (°) for (PYM)C2-H...N1'(PYM) optimized at the DFT- B3LYP/6-31+G\*\* level.

| Vector      | Length |
|-------------|--------|
| N1-C6       | 1.339  |
| N1-C2       | 1.341  |
| N1'-C2'     | 1.339  |
| N1'-C6'     | 1.340  |
| N3-C4       | 1.339  |
| N3-C2       | 1.342  |
| N3'-C2'     | 1.338  |
| N3'-C4'     | 1.340  |
| C2'-H2'     | 1.087  |
| C2-H2       | 1.088  |
| C4'-H4'     | 1.088  |
| C4'-C5'     | 1.395  |
| C4-H4       | 1.088  |
| C4-C5       | 1.394  |
| C5-H5       | 1.085  |
| C5-C6       | 1.395  |
| C5'-H5'     | 1.085  |
| C5'-C6'     | 1.394  |
| C6'-H6'     | 1.088  |
| C6-H6       | 1.088  |
| H2...N1'    | 2.462  |
| C2...N1'    | 3.551  |
| Vectors     | Angle  |
| C6-N1-C2    | 116.20 |
| C2'-N1'-C6' | 116.15 |
| C4-N3-C2    | 116.19 |
| C2'-N3'-C4' | 115.97 |
| H2'-C2'-N3' | 116.60 |
| H2'-C2'-N1' | 116.50 |
| N3'-C2'-N1' | 126.91 |
| H2-C2-N1    | 116.78 |
| H2-C2-N3    | 116.69 |

---

|              |               |
|--------------|---------------|
| N1-C2-N3     | 126.53        |
| H4'-C4'-N3'  | 116.43        |
| H4'-C4'-C5'  | 121.24        |
| N3'-C4'-C5'  | 122.32        |
| H4-C4-N3     | 116.49        |
| H4-C4-C5     | 121.18        |
| N3-C4-C5     | 122.33        |
| H5-C5-C4     | 121.79        |
| H5-C5-C6     | 121.79        |
| C4-C5-C6     | 116.42        |
| H5'-C5'-C6'  | 121.71        |
| H5'-C5'-C4'  | 121.75        |
| C6'-C5'-C4'  | 116.54        |
| H6'-C6'-N1'  | 116.46        |
| H6'-C6'-C5'  | 121.42        |
| N1'-C6'-C5'  | 122.12        |
| H6-C6-N1     | 116.48        |
| H6-C6-C5     | 121.19        |
| N1-C6-C5     | 122.33        |
| C2-H2...N1'  | 180.00(fixed) |
| H2...N1'-C2' | 122.76        |
| H2...N1'-C4' | 121.09        |

---

**(PYM)C5-H...N1'(PYM)**

Table 215S. Computed atomic orthogonal coordinates for (PYM)C5-H...N1'(PYM) optimized at the DFT- B3LYP/6-31G\*\* level.

| Atom | x        | y        | z        |
|------|----------|----------|----------|
| N1   | 0.38600  | 0.07462  | -0.09384 |
| C2   | 0.44528  | -0.00014 | -0.00008 |
| H2   | 0.55411  | -0.00042 | -0.00026 |
| N3   | 0.38596  | -0.07454 | 0.09393  |
| C4   | 0.25199  | -0.07317 | 0.09281  |
| H4   | 0.20241  | -0.13342 | 0.16875  |
| C5   | 0.17816  | 0.00055  | 0.00039  |
| H5   | 0.06950  | 0.00089  | 0.00063  |
| C6   | 0.25203  | 0.07386  | -0.09232 |
| H6   | 0.20247  | 0.13425  | -0.16816 |
| N1'  | -0.17477 | 0.00180  | 0.00129  |
| N3'  | -0.37810 | -0.10029 | -0.07357 |
| C2'  | -0.24508 | -0.09005 | -0.06610 |
| H2'  | -0.18754 | -0.16449 | -0.12074 |
| C4'  | -0.44759 | -0.00801 | -0.00586 |
| C5'  | -0.38577 | 0.09268  | 0.06799  |
| C6'  | -0.24654 | 0.09300  | 0.06822  |
| H4'  | -0.55606 | -0.01534 | -0.01122 |
| H5'  | -0.44304 | 0.16696  | 0.12253  |
| H6'  | -0.19037 | 0.16814  | 0.12338  |

Table 216S. Computed bond lengths (Å) and angles (°) for (PYM)C5-H...N1'(PYM) optimized at the DFT- B3LYP/6-31G\*\* level.

| Vector      | Distance |
|-------------|----------|
| N1-C2       | 1.338    |
| N1-C6       | 1.340    |
| N1'-C2'     | 1.339    |
| N1'-C6'     | 1.340    |
| N3'-C2'     | 1.336    |
| N3'-C4'     | 1.339    |
| N3-C2       | 1.338    |
| N3-C4       | 1.340    |
| C4-C5       | 1.394    |
| C4'-C5'     | 1.393    |
| C5'-C6'     | 1.392    |
| C5-C6       | 1.394    |
| H2-C2       | 1.088    |
| H2'-C2'     | 1.088    |
| H4'-C4'     | 1.088    |
| H4-C4       | 1.089    |
| H5'-C5'     | 1.085    |
| H5-C5       | 1.087    |
| H6-C6       | 1.089    |
| H6'-C6'     | 1.088    |
| H5...N1'    | 2.443    |
| C5...N1'    | 3.529    |
| Vectors     | Angle    |
| C2-N1-C6    | 115.59   |
| C2'-N1'-C6' | 115.93   |
| C2'-N3'-C4' | 115.82   |
| C2-N3-C4    | 115.59   |
| H2'-C2'-N3' | 116.48   |
| H2'-C2'-N1' | 116.39   |
| N3'-C2'-N1' | 127.13   |
| H2-C2-N1    | 116.32   |
| H2-C2-N3    | 116.31   |

---

|             |        |
|-------------|--------|
| N1-C2-N3    | 127.37 |
| H4-C4-N3    | 116.35 |
| H4-C4-C5    | 120.93 |
| N3-C4-C5    | 122.72 |
| H4'-C4'-N3' | 116.48 |
| H4'-C4'-C5' | 121.12 |
| N3'-C4'-C5' | 122.40 |
| H5'-C5'-C6' | 121.70 |
| H5'-C5'-C4' | 121.80 |
| C6'-C5'-C4' | 116.50 |
| H5-C5-C4    | 122.00 |
| H5-C5-C6    | 121.99 |
| C4-C5-C6    | 116.01 |
| H6-C6-N1    | 116.37 |
| H6-C6-C5    | 120.92 |
| N1-C6-C5    | 122.72 |
| H6'-C6'-N1' | 116.53 |
| H6'-C6'-C5' | 121.24 |
| N1'-C6'-C5' | 122.23 |
| C5-H5...N1' | 179.97 |

---

Table 217S. Computed atomic orthogonal coordinates for (PYM)C5-H...N1'(PYM) optimized at the DFT- B3LYP/6-31+G\*\* level.

| Atom | x        | y        | z        |
|------|----------|----------|----------|
| H5'  | 0.44600  | 0.18194  | 0.09933  |
| H6'  | 0.19306  | 0.18303  | 0.09993  |
| H6   | -0.20548 | -0.10587 | 0.18756  |
| C5'  | 0.38872  | 0.10099  | 0.05513  |
| C6'  | 0.24935  | 0.10129  | 0.05530  |
| N1   | -0.38887 | -0.05922 | 0.10415  |
| C6   | -0.25481 | -0.05808 | 0.10316  |
| H2   | -0.55732 | -0.00054 | -0.00029 |
| H4'  | 0.55917  | -0.01676 | -0.00915 |
| C2   | -0.44858 | -0.00019 | -0.00010 |
| C4'  | 0.45075  | -0.00866 | -0.00473 |
| N1'  | 0.17767  | 0.00184  | 0.00100  |
| C5   | -0.18103 | 0.00068  | 0.00037  |
| H5   | -0.07246 | 0.00103  | 0.00056  |
| N3   | -0.38890 | 0.05923  | -0.10415 |
| C4   | -0.25484 | 0.05896  | -0.10268 |
| N3'  | 0.38110  | -0.10911 | -0.05957 |
| C2'  | 0.24793  | -0.09826 | -0.05365 |
| H4   | -0.20552 | 0.10706  | -0.18690 |
| H2'  | 0.19059  | -0.17936 | -0.09793 |

Table 218S. Computed bond lengths (Å) and angles (°) for (PYM)C5-H...N1'(PYM) optimized at the DFT- B3LYP/6-31+G\*\* level.

| Vector      | Length |
|-------------|--------|
| N1-C2       | 1.339  |
| N1-C6       | 1.341  |
| N1'-C2'     | 1.340  |
| N1'-C6'     | 1.341  |
| N3-C2       | 1.339  |
| N3-C4       | 1.341  |
| N3'-C2'     | 1.337  |
| N3'-C4'     | 1.340  |
| C2-H2       | 1.087  |
| C2'-H2'     | 1.087  |
| C4'-H4'     | 1.088  |
| C4'-N3'     | 1.340  |
| C4'-C5'     | 1.395  |
| C4-H4       | 1.088  |
| C4-N3       | 1.341  |
| C4-C5       | 1.395  |
| C5'-H5'     | 1.086  |
| C5'-C6'     | 1.394  |
| C5-H5       | 1.086  |
| C5-C6       | 1.395  |
| C6'-H6'     | 1.088  |
| C6-H6       | 1.088  |
| N1'...H5    | 2.501  |
| N1'...C5    | 3.587  |
| Vectors     | Angle  |
| C2-N1-C6    | 115.88 |
| C2'-N1'-C6' | 116.05 |
| C2-N3-C4    | 115.87 |
| C2'-N3'-C4' | 116.02 |
| H2-C2-N1    | 116.49 |
| H2-C2-N3    | 116.48 |
| N1-C2-N3    | 127.03 |



---

|              |        |
|--------------|--------|
| H2'-C2'-N3'  | 116.52 |
| H2'-C2'-N1'  | 116.54 |
| N3'-C2'-N1'  | 126.94 |
| H4'-C4'-N3'  | 116.46 |
| H4'-C4'-C5'  | 121.27 |
| N3'-C4'-C5'  | 122.27 |
| H4-C4-N3     | 116.35 |
| H4-C4-C5     | 121.10 |
| N3-C4-C5     | 122.55 |
| H5'-C5'-C6'  | 121.70 |
| H5'-C5'-C4'  | 121.75 |
| C6'-C5'-C4'  | 116.55 |
| H5-C5-C4     | 121.94 |
| H5-C5-C6     | 121.93 |
| C4-C5-C6     | 116.13 |
| H6'-C6'-N1'  | 116.53 |
| H6'-C6'-C5'  | 121.29 |
| N1'-C6'-C5'  | 122.18 |
| H6-C6-N1     | 116.35 |
| H6-C6-C5     | 121.11 |
| N1-C6-C5     | 122.54 |
| C2'-N1'...H5 | 121.42 |
| C6'-N1'...H5 | 122.53 |
| C5-H5...N1'  | 180.00 |

---

**TWO-PARTICLE SYSTEMS****Other molecule...Cl<sup>-</sup> systems****(AA)N1-H...Cl<sup>-</sup>**Table 219S. Computed atomic orthogonal coordinates for (AA)N1-H...Cl<sup>-</sup> optimized at the DFT-B3LYP/6-31+G\*\* level.

| Atom | x        | y        | z        |
|------|----------|----------|----------|
| N1   | 0.04717  | -0.09745 | -0.00003 |
| C2   | 0.14929  | -0.00944 | -0.00001 |
| C3   | 0.10804  | 0.13710  | -0.00002 |
| O4   | 0.26884  | -0.04314 | 0.00003  |
| H5   | -0.05260 | -0.06863 | -0.00013 |
| H6   | 0.07035  | -0.19574 | 0.00005  |
| H7   | 0.15181  | 0.18558  | -0.08793 |
| H8   | 0.15067  | 0.18520  | 0.08865  |
| H9   | -0.00057 | 0.14980  | -0.00063 |
| C110 | -0.25556 | 0.00030  | 0.00001  |

Table 220S. Computed bond lengths (Å) and angles (°) for (AA)N1-H...Cl<sup>-</sup> optimized at the DFT-B3LYP/6-31+G\*\* level.

| Vector       | Length |
|--------------|--------|
| N1-C2        | 1.348  |
| C2-O4        | 1.242  |
| C2-C3        | 1.522  |
| H5-N1        | 1.038  |
| H6-N1        | 1.010  |
| H7-C3        | 1.095  |
| H8-C3        | 1.095  |
| H9-C3        | 1.094  |
| H5...Cl10    | 2.143  |
| N1...Cl10    | 3.181  |
| Vectors      | Angle  |
| H6-N1-H5     | 119.38 |
| H6-N1-C2     | 117.49 |
| H5-N1-C2     | 123.13 |
| O4-C2-N1     | 123.50 |
| O4-C2-C3     | 121.46 |
| N1-C2-C3     | 115.03 |
| H9-C3-H7     | 109.94 |
| H9-C3-H8     | 109.88 |
| H9-C3-C2     | 112.39 |
| H7-C3-H8     | 107.45 |
| H7-C3-C2     | 108.53 |
| H8-C3-C2     | 108.50 |
| N1-H5...Cl10 | 177.35 |

Table 221S. Computed atomic orthogonal coordinates for (AA)N1-H...Cl<sup>-</sup> optimized at the *ab initio*- MP2/6-31+G\*\* level.

| Atom | x        | y        | z        |
|------|----------|----------|----------|
| N1   | 0.04787  | -0.09897 | 0.01216  |
| C2   | 0.14731  | -0.00859 | -0.00007 |
| C3   | 0.10231  | 0.13598  | 0.00456  |
| O4   | 0.26787  | -0.03951 | -0.01074 |
| H5   | -0.05157 | -0.07175 | 0.00865  |
| H6   | 0.07304  | -0.19622 | 0.00400  |
| H7   | 0.14983  | 0.18937  | -0.07758 |
| H8   | 0.13747  | 0.17990  | 0.09795  |
| H9   | -0.00600 | 0.14471  | -0.00152 |
| C110 | -0.25168 | -0.00008 | -0.00339 |

Table 222S. Computed bond lengths (Å) and angles (°) for (AA)N1-H...Cl<sup>-</sup> optimized at the *ab initio*- MP2/6-31+G\*\* level.

| Vector       | Length |
|--------------|--------|
| N1-C2        | 1.349  |
| C2-O4        | 1.249  |
| C2-C3        | 1.515  |
| H5-N1        | 1.032  |
| H6-N1        | 1.008  |
| H7-C3        | 1.089  |
| H8-C3        | 1.090  |
| H9-C3        | 1.088  |
| H5...Cl10    | 2.129  |
| N1...Cl10    | 3.158  |
| Vectors      | Angle  |
| H6-N1-H5     | 119.51 |
| H6-N1-C2     | 117.06 |
| H5-N1-C2     | 122.04 |
| O4-C2-N1     | 123.59 |
| O4-C2-C3     | 121.70 |
| N1-C2-C3     | 114.68 |
| H9-C3-H7     | 110.66 |
| H9-C3-H8     | 109.66 |
| H9-C3-C2     | 111.75 |
| H7-C3-H8     | 107.93 |
| H7-C3-C2     | 108.38 |
| H8-C3-C2     | 108.35 |
| N1-H5...Cl10 | 175.42 |

**(MAA)N1-H...Cl<sup>-</sup>**Table 223S. Computed atomic orthogonal coordinates for (MAA)N1-H...Cl<sup>-</sup> optimized at the DFT-B3LYP/6-31+G\*\* level.

| Atom | x        | y        | z        |
|------|----------|----------|----------|
| N1   | -0.04184 | 0.05579  | 0.00000  |
| C2   | -0.13665 | -0.03987 | 0.00000  |
| C3   | -0.08453 | -0.18286 | 0.00000  |
| C4   | -0.07612 | 0.19644  | 0.00000  |
| O5   | -0.25862 | -0.01517 | 0.00000  |
| H1   | 0.05882  | 0.03033  | 0.00000  |
| H3a  | 0.02473  | -0.18750 | 0.00002  |
| H3b  | -0.12381 | -0.23445 | 0.08827  |
| H3c  | -0.12377 | -0.23444 | -0.08829 |
| H4a  | 0.01691  | 0.25368  | -0.00014 |
| H4b  | -0.13522 | 0.22327  | 0.08850  |
| H4c  | -0.13547 | 0.22319  | -0.08835 |
| Cl1  | 0.26844  | -0.01092 | 0.00000  |

Table 224S. Computed bond lengths (Å) and angles (°) for (MAA)N1-H...Cl<sup>-</sup> optimized at the DFT- B3LYP/6-31+G\*\* level.

| Atom       | Length |
|------------|--------|
| N1-C2      | 1.347  |
| N1-C4      | 1.448  |
| C2-O5      | 1.244  |
| C2-C3      | 1.522  |
| H1-N1      | 1.038  |
| H3a-C3     | 1.094  |
| H3b-C3     | 1.095  |
| H3c-C3     | 1.095  |
| H4a-C4     | 1.092  |
| H4b-C4     | 1.097  |
| H4c-C4     | 1.097  |
| Cl1...H1   | 2.136  |
| Cl1...N1   | 3.174  |
| Vectors    | Angle  |
| H1-N1-C2   | 120.55 |
| H1-N1-C4   | 117.89 |
| C2-N1-C4   | 121.56 |
| O5-C2-N1   | 123.30 |
| O5-C2-C3   | 121.47 |
| N1-C2-C3   | 115.23 |
| H3a-C3-H3b | 109.77 |
| H3a-C3-H3c | 109.76 |
| H3a-C3-C2  | 112.46 |
| H3b-C3-H3c | 107.42 |
| H3b-C3-C2  | 108.65 |
| H3c-C3-C2  | 108.65 |
| H4a-C4-H4b | 109.36 |
| H4a-C4-H4c | 109.38 |
| H4a-C4-N1  | 107.91 |
| H4b-C4-H4c | 107.36 |
| H4b-C4-N1  | 111.41 |
| H4c-C4-N1  | 111.40 |

---

N1-H1...Cl1

176.94

---



Table 225S. Computed atomic orthogonal coordinates for (MAA)N1-H...Cl<sup>-</sup> optimized at the *ab initio*- MP2/6-31+G\*\* level.

| Atom | x        | y        | z        |
|------|----------|----------|----------|
| N1   | -0.04075 | 0.05606  | 0.00000  |
| C2   | -0.13394 | -0.04097 | 0.00000  |
| C3   | -0.07942 | -0.18227 | 0.00000  |
| C4   | -0.07906 | 0.19539  | 0.00000  |
| O5   | -0.25711 | -0.01788 | 0.00000  |
| H1   | 0.05983  | 0.03225  | 0.00000  |
| H3a  | -0.11751 | -0.23403 | -0.08804 |
| H3b  | -0.11743 | -0.23399 | 0.08809  |
| H3c  | 0.02942  | -0.18384 | -0.00005 |
| H4a  | 0.01207  | 0.25473  | -0.00015 |
| H4b  | -0.13860 | 0.21969  | 0.08821  |
| H4c  | -0.13885 | 0.21960  | -0.08806 |
| Cl1  | 0.26516  | -0.00921 | 0.00000  |

Table 226S. Computed bond lengths (Å) and angles (°) for (MAA)N1-H...Cl<sup>-</sup> optimized at the *ab initio*- MP2/6-31+G\*\* level.

| Vector     | Length |
|------------|--------|
| N1-C2      | 1.345  |
| N1-C4      | 1.445  |
| C2-O5      | 1.253  |
| C2-C3      | 1.515  |
| H1-N1      | 1.034  |
| H3a-C3     | 1.090  |
| H3b-C3     | 1.090  |
| H3c-C3     | 1.089  |
| H4a-C4     | 1.087  |
| H4b-C4     | 1.092  |
| H4c-C4     | 1.092  |
| H1...Cl1   | 2.095  |
| N1...Cl1   | 3.128  |
| Vectors    | Angle  |
| H1-N1-C2   | 120.53 |
| H1-N1-C4   | 118.69 |
| C2-N1-C4   | 120.78 |
| O5-C2-N1   | 123.23 |
| O5-C2-C3   | 121.72 |
| N1-C2-C3   | 115.06 |
| H3c-C3-H3a | 110.01 |
| H3c-C3-H3b | 110.01 |
| H3c-C3-C2  | 111.93 |
| H3a-C3-H3b | 107.79 |
| H3a-C3-C2  | 108.50 |
| H3b-C3-C2  | 108.49 |
| H4a-C4-H4b | 109.68 |
| H4a-C4-H4c | 109.69 |
| H4a-C4-N1  | 107.70 |
| H4b-C4-H4c | 107.68 |
| H4b-C4-N1  | 111.05 |
| H4c-C4-N1  | 111.04 |

---

N1-H1...Cl1

178.10

---

**(MAA)N1-H...F<sup>-</sup>**Table 227S. Computed atomic orthogonal coordinates for (MAA)N1-H...F<sup>-</sup> optimized at the DFT-B3LYP/6-31+G\*\* level.

| Atom | x        | y        | z        |
|------|----------|----------|----------|
| N1   | 0.02618  | 0.04754  | 0.00000  |
| C2   | -0.08598 | -0.02532 | 0.00000  |
| C3   | -0.06436 | -0.17645 | 0.00000  |
| C4   | 0.01628  | 0.19190  | 0.00000  |
| O5   | -0.20222 | 0.02178  | 0.00000  |
| H1   | 0.12944  | -0.00058 | 0.00000  |
| H3a  | 0.04188  | -0.20227 | 0.00004  |
| H3b  | -0.11334 | -0.21929 | 0.08824  |
| H3c  | -0.11328 | -0.21928 | -0.08828 |
| H4a  | 0.11764  | 0.23313  | -0.00008 |
| H4b  | -0.03760 | 0.22946  | 0.08826  |
| H4c  | -0.03774 | 0.22945  | -0.08818 |
| F1   | 0.25021  | -0.05538 | 0.00000  |

Table 228S. Computed bond lengths (Å) and angles (°) for (MAA)N1-H...F<sup>-</sup> optimized at the DFT- B3LYP/6-31+G\*\* level.

| Vector     | Length |
|------------|--------|
| N1-C2      | 1.337  |
| N1-C4      | 1.447  |
| C2-O5      | 1.254  |
| C2-C3      | 1.527  |
| H1-N1      | 1.139  |
| H3a-C3     | 1.093  |
| H3b-C3     | 1.096  |
| H3c-C3     | 1.096  |
| H4a-C4     | 1.094  |
| H4b-C4     | 1.100  |
| H4c-C4     | 1.100  |
| H1...F1    | 1.326  |
| N1...F1    | 2.465  |
| Vectors    | Angle  |
| H1-N1-C2   | 122.01 |
| H1-N1-C4   | 118.91 |
| C2-N1-C4   | 119.08 |
| O5-C2-N1   | 124.93 |
| O5-C2-C3   | 120.20 |
| N1-C2-C3   | 114.87 |
| H3a-C3-H3b | 109.97 |
| H3a-C3-H3c | 109.97 |
| H3a-C3-C2  | 111.80 |
| H3b-C3-H3c | 107.22 |
| H3b-C3-C2  | 108.88 |
| H3c-C3-C2  | 108.88 |
| H4a-C4-H4b | 109.00 |
| H4a-C4-H4c | 109.00 |
| H4a-C4-N1  | 108.21 |
| H4b-C4-H4c | 106.62 |
| H4b-C4-N1  | 111.97 |
| H4c-C4-N1  | 111.97 |

---

N1-H1...F1

179.42

---

Table 229S. Computed atomic orthogonal coordinates for (MAA)N1-H...F<sup>-</sup> optimized at the *ab initio* MP2/6-31+G\*\* level.

| Atom | x        | y        | z        |
|------|----------|----------|----------|
| N1   | 0.02647  | 0.04698  | 0.00000  |
| C2   | -0.08547 | -0.02619 | 0.00000  |
| C3   | -0.06347 | -0.17644 | 0.00000  |
| C4   | 0.01409  | 0.19104  | 0.00000  |
| O5   | -0.20250 | 0.02126  | 0.00000  |
| H1   | 0.12939  | 0.00000  | 0.00000  |
| H3a  | 0.04257  | -0.20103 | -0.00003 |
| H3b  | -0.11186 | -0.21891 | 0.08805  |
| H3c  | -0.11192 | -0.21892 | -0.08801 |
| H4a  | 0.11447  | 0.23327  | -0.00007 |
| H4b  | -0.04027 | 0.22666  | 0.08798  |
| H4c  | -0.04040 | 0.22664  | -0.08791 |
| F1   | 0.25132  | -0.05301 | 0.00000  |

Table 230S. Computed bond lengths (Å) and angles (°) for (MAA)N1-H...F<sup>-</sup> optimized at the *ab initio* MP2/6-31+G\*\* level.

| Vector     | Length |
|------------|--------|
| N1-C2      | 1.337  |
| N1-C4      | 1.446  |
| C2-O5      | 1.263  |
| C2-C3      | 1.519  |
| H1-N1      | 1.131  |
| H3a-C3     | 1.089  |
| H3b-C3     | 1.091  |
| H3c-C3     | 1.091  |
| H4a-C4     | 1.089  |
| H4b-C4     | 1.094  |
| H4c-C4     | 1.094  |
| H1...F1    | 1.330  |
| N1...F1    | 2.461  |
| Vectors    | Angle  |
| H1-N1-C2   | 122.29 |
| H1-N1-C4   | 119.45 |
| C2-N1-C4   | 118.26 |
| O5-C2-N1   | 124.76 |
| O5-C2-C3   | 120.40 |
| N1-C2-C3   | 114.84 |
| H3a-C3-H3b | 110.15 |
| H3a-C3-H3c | 110.15 |
| H3a-C3-C2  | 111.39 |
| H3b-C3-H3c | 107.62 |
| H3b-C3-C2  | 108.72 |
| H3c-C3-C2  | 108.72 |
| H4a-C4-H4b | 109.41 |
| H4a-C4-H4c | 109.42 |
| H4a-C4-N1  | 107.90 |
| H4b-C4-H4c | 107.03 |
| H4b-C4-N1  | 111.53 |
| H4c-C4-N1  | 111.53 |



---

N1-H1...F1

178.96

---

**(MA)N1...H<sup>+</sup>...Cl<sup>-</sup>**Table 231S. Computed atomic orthogonal coordinates for (MA)N1...H<sup>+</sup>...Cl<sup>-</sup> optimized at the DFT- B3LYP/6-31+G\*\* level.

| Atom | x        | y        | z        |
|------|----------|----------|----------|
| N1   | -0.11415 | 0.06761  | 0.00000  |
| C2   | -0.19707 | -0.05457 | 0.00000  |
| H3   | 0.03265  | 0.03036  | 0.00004  |
| H4   | -0.13261 | 0.12496  | -0.08205 |
| H5   | -0.13268 | 0.12504  | 0.08199  |
| H6   | -0.17230 | -0.11379 | 0.08838  |
| H7   | -0.17214 | -0.11388 | -0.08827 |
| H8   | -0.30463 | -0.03360 | -0.00010 |
| C19  | 0.16842  | -0.00970 | 0.00000  |

Table 232S. Computed bond lengths (Å) and angles (°) for (MA)N1...H<sup>+</sup>...Cl<sup>-</sup> optimized at the DFT- B3LYP/6-31+G\*\* level.

| Vector      | Length |
|-------------|--------|
| N1-C2       | 1.477  |
| H3-C19      | 1.416  |
| H4-N1       | 1.018  |
| H5-N1       | 1.018  |
| H6-C2       | 1.092  |
| H7-C2       | 1.092  |
| H8-C2       | 1.096  |
| H3...N1     | 1.515  |
| C19...N1    | 2.930  |
| Vectors     | Angle  |
| H4-N1-H5    | 107.36 |
| H4-N1-C2    | 111.37 |
| H5-N1-C2    | 111.38 |
| H6-C2-H7    | 107.92 |
| H6-C2-H8    | 109.09 |
| H6-C2-N1    | 108.74 |
| H7-C2-H8    | 109.10 |
| H7-C2-N1    | 108.73 |
| H8-C2-N1    | 113.13 |
| C19-H3...N1 | 177.80 |
| H3...N1-C2  | 109.93 |
| H3...N1-H4  | 108.33 |
| H3...N1-H5  | 108.36 |

Table 233S. Computed atomic orthogonal coordinates for (MA)N1...H<sup>+</sup>...Cl<sup>-</sup> optimized at the *ab initio*- MP2/6-31+G\*\* level.

| Atom | x        | y        | z        |
|------|----------|----------|----------|
| N1   | 0.12053  | 0.06928  | 0.00000  |
| C2   | 0.19574  | -0.05723 | 0.00000  |
| H3   | -0.04332 | 0.03149  | -0.00004 |
| H4   | 0.14414  | 0.12504  | 0.08151  |
| H5   | 0.14416  | 0.12506  | -0.08150 |
| H6   | 0.16735  | -0.11449 | -0.08798 |
| H7   | 0.16734  | -0.11449 | 0.08797  |
| H8   | 0.30401  | -0.04371 | 0.00001  |
| C19  | -0.17070 | -0.00885 | 0.00000  |

Table 234S. Computed bond lengths (Å) and angles (°) for (MA)N1...H<sup>+</sup>...Cl<sup>-</sup> optimized at the *ab initio*- MP2/6-31+G\*\* level.

| Vector      | Length |
|-------------|--------|
| N1-C2       | 1.472  |
| H4-N1       | 1.015  |
| H5-N1       | 1.015  |
| H6-C2       | 1.087  |
| H7-C2       | 1.087  |
| H8-C2       | 1.091  |
| C19-H3      | 1.336  |
| H3...N1     | 1.683  |
| C19...N1    | 3.015  |
| Vectors     | Angle  |
| H4-N1-H5    | 106.77 |
| H4-N1-C2    | 110.68 |
| H5-N1-C2    | 110.69 |
| H6-C2-H7    | 108.00 |
| H6-C2-H8    | 108.93 |
| H6-C2-N1    | 108.61 |
| H7-C2-H8    | 108.93 |
| H7-C2-N1    | 108.61 |
| H8-C2-N1    | 113.61 |
| C19-H3...N1 | 175.41 |
| H3...N1-C2  | 107.74 |
| H3...N1-H4  | 110.50 |
| H3...N1-H5  | 110.49 |

**(MAB)N1-H...Cl<sup>-</sup>**Table 235S. Computed atomic orthogonal coordinates for (MAB)N1-H...Cl<sup>-</sup> optimized at the DFT-B3LYP/6-31+G\*\* level.

| Atom | x        | y        | z        |
|------|----------|----------|----------|
| N1   | 0.14429  | 0.07610  | -0.01256 |
| C2   | 0.21000  | -0.05389 | 0.00221  |
| H3   | 0.04340  | 0.06026  | -0.02626 |
| H4   | 0.15035  | 0.12688  | 0.07547  |
| H5   | 0.20051  | -0.10946 | -0.09175 |
| H6   | 0.16852  | -0.11792 | 0.08197  |
| H7   | 0.31735  | -0.04015 | 0.02149  |
| Cl8  | -0.18530 | -0.00759 | 0.00081  |

Table 236S. Computed bond lengths (Å) and angles (°) for (MAB)N1-H...Cl<sup>-</sup> optimized at the DFT- B3LYP/6-31+G\*\* level.

| Vector   | Length |
|----------|--------|
| N1-C2    | 1.464  |
| H3-N1    | 1.030  |
| H4-N1    | 1.018  |
| H5-C2    | 1.096  |
| H6-C2    | 1.104  |
| H7-C2    | 1.099  |
| H3...Cl8 | 2.401  |
| N1...Cl8 | 3.403  |

  

| Vectors     | Angle  |
|-------------|--------|
| H4-N1-H3    | 104.47 |
| H4-N1-C2    | 109.20 |
| H3-N1-C2    | 108.44 |
| H5-C2-H7    | 107.36 |
| H5-C2-H6    | 107.03 |
| H5-C2-N1    | 108.96 |
| H7-C2-H6    | 108.23 |
| H7-C2-N1    | 110.18 |
| H6-C2-N1    | 114.79 |
| N1-H3...Cl8 | 163.98 |

Table 237S. Computed atomic orthogonal coordinates for (MAB)N1-H...Cl<sup>-</sup> optimized at the *ab initio*- MP2/6-31+G\*\* level.

| Atom | x        | y        | z        |
|------|----------|----------|----------|
| N1   | 0.14392  | 0.07705  | -0.01248 |
| C2   | 0.20321  | -0.05586 | 0.00205  |
| H3   | 0.04289  | 0.06491  | -0.02473 |
| H4   | 0.15360  | 0.12723  | 0.07522  |
| H5   | 0.18841  | -0.11081 | -0.09082 |
| H6   | 0.16022  | -0.11611 | 0.08289  |
| H7   | 0.31081  | -0.04692 | 0.01889  |
| C18  | -0.18133 | -0.00721 | 0.00080  |



Table 238S. Computed bond lengths (Å) and angles (°) for (MAB)N1-H...Cl<sup>-</sup> optimized at the *ab initio*- MP2/6-31+G\*\* level.

| Vector   | Length |
|----------|--------|
| N1-C2    | 1.463  |
| H3-N1    | 1.025  |
| H4-N1    | 1.015  |
| H5-C2    | 1.089  |
| H6-C2    | 1.096  |
| H7-C2    | 1.093  |
| H3...Cl8 | 2.369  |
| N1...Cl8 | 3.362  |

  

| Vectors     | Angle  |
|-------------|--------|
| H4-N1-H3    | 104.82 |
| H4-N1-C2    | 108.95 |
| H3-N1-C2    | 107.69 |
| H5-C2-H7    | 107.85 |
| H5-C2-H6    | 107.35 |
| H5-C2-N1    | 108.58 |
| H7-C2-H6    | 108.51 |
| H7-C2-N1    | 109.88 |
| H6-C2-N1    | 114.44 |
| N1-H3...Cl8 | 162.96 |

**(MGU) NH<sub>2</sub>NH...Cl<sup>-</sup>**Table 239S. Computed atomic orthogonal coordinates for (MGU)NH<sub>2</sub>NH...Cl<sup>-</sup> optimized at the DFT-B3LYP/6-31+G\*\* level.

| Atom | x        | y        | z        |
|------|----------|----------|----------|
| C11  | 0.24744  | 0.01163  | 0.00285  |
| C1   | -0.09371 | -0.05531 | -0.00051 |
| N2   | -0.00666 | -0.15646 | -0.01090 |
| N3   | -0.22742 | -0.08018 | 0.00347  |
| N4   | -0.04802 | 0.06906  | 0.00017  |
| C5   | -0.13057 | 0.18838  | -0.00392 |
| H2a  | -0.03426 | -0.25030 | 0.01345  |
| H2b  | 0.09451  | -0.12960 | -0.00913 |
| H3a  | -0.26094 | -0.17513 | 0.00661  |
| H3b  | -0.29146 | -0.00796 | 0.03218  |
| H4   | 0.05734  | 0.07615  | 0.00142  |
| H5a  | -0.06408 | 0.27415  | -0.01465 |
| H5b  | -0.18817 | 0.20217  | 0.08857  |
| H5c  | -0.19907 | 0.18731  | -0.08954 |

Table 240S. Computed bond lengths (Å) and angles (°) for (MGU)NH<sub>2</sub>NH...Cl<sup>-</sup> optimized at the DFT-B3LYP/6-31+G\*\* level.

| Vector     | Length |
|------------|--------|
| C1-N4      | 1.325  |
| C1-N2      | 1.339  |
| C1-N3      | 1.361  |
| C5-N4      | 1.451  |
| H2a-N2     | 1.008  |
| H2b-N2     | 1.047  |
| H3a-N3     | 1.007  |
| H3b-N3     | 1.007  |
| H4-N4      | 1.056  |
| H5a-C5     | 1.091  |
| H5b-C5     | 1.098  |
| H5c-C5     | 1.097  |
| H2b...Cl1  | 2.085  |
| N2...Cl1   | 3.050  |
| H4...Cl1   | 2.008  |
| N4...Cl1   | 3.010  |
| Vectors    | Angle  |
| N4-C1-N2   | 119.04 |
| N4-C1-N3   | 120.68 |
| N2-C1-N3   | 120.21 |
| H5a-C5-H5c | 108.16 |
| H5a-C5-H5b | 107.69 |
| H5a-C5-N4  | 107.61 |
| H5c-C5-H5b | 109.34 |
| H5c-C5-N4  | 111.67 |
| H5b-C5-N4  | 112.19 |
| H2a-N2-H2b | 119.96 |
| H2a-N2-C1  | 120.44 |
| H2b-N2-C1  | 115.68 |
| H3b-N3-H3a | 117.09 |
| H3b-N3-C1  | 120.15 |
| H3a-N3-C1  | 120.01 |

---

|              |        |
|--------------|--------|
| H4-N4-C1     | 114.02 |
| H4-N4-C5     | 120.83 |
| C1-N4-C5     | 125.12 |
| N2-H2b...C11 | 152.07 |
| N4-H4...C11  | 157.04 |

---

Table 241S. Computed atomic orthogonal coordinates for (MGU)NH<sub>2</sub>NH...Cl<sup>-</sup> optimized at the *ab initio*-MP2/6-31+G\*\* level.

| Atom | x        | y        | z        |
|------|----------|----------|----------|
| C11  | 0.24519  | 0.01008  | 0.00451  |
| C1   | -0.09386 | -0.05422 | -0.00024 |
| N2   | -0.01051 | -0.15836 | -0.01661 |
| N3   | -0.22868 | -0.07494 | 0.00480  |
| N4   | -0.04477 | 0.06813  | -0.00115 |
| C5   | -0.12521 | 0.18869  | -0.00565 |
| H2a  | -0.03746 | -0.24809 | 0.02043  |
| H2b  | 0.08998  | -0.13284 | -0.01392 |
| H3a  | -0.26129 | -0.16983 | 0.01358  |
| H3b  | -0.28548 | -0.00536 | 0.05037  |
| H4   | 0.06084  | 0.07198  | 0.00057  |
| H5a  | -0.05784 | 0.27191  | -0.02353 |
| H5b  | -0.17715 | 0.20648  | 0.08877  |
| H5c  | -0.19776 | 0.18384  | -0.08692 |

Table 242S. Computed bond lengths (Å) and angles (°) for (MGU)NH<sub>2</sub>NH...Cl<sup>-</sup> optimized at the *ab initio*-MP2/6-31+G\*\* level.

| Vector     | Length |
|------------|--------|
| C1-N4      | 1.318  |
| C1-N2      | 1.344  |
| C1-N3      | 1.365  |
| C5-N4      | 1.450  |
| H2a-N2     | 1.007  |
| H2b-N2     | 1.037  |
| H3a-N3     | 1.007  |
| H3b-N3     | 1.007  |
| H4-N4      | 1.057  |
| H5a-C5     | 1.086  |
| H5b-C5     | 1.092  |
| H5c-C5     | 1.090  |
| H2b...Cl1  | 2.118  |
| N2...Cl1   | 3.069  |
| H4...Cl1   | 1.945  |
| N4...Cl1   | 2.954  |
| Vectors    | Angle  |
| N4-C1-N2   | 119.17 |
| N4-C1-N3   | 120.59 |
| N2-C1-N3   | 119.96 |
| H5a-C5-H5c | 108.92 |
| H5a-C5-H5b | 108.22 |
| H5a-C5-N4  | 107.35 |
| H5c-C5-H5b | 109.58 |
| H5c-C5-N4  | 110.81 |
| H5b-C5-N4  | 111.86 |
| H2a-N2-H2b | 117.96 |
| H2a-N2-C1  | 118.65 |
| H2b-N2-C1  | 114.02 |
| H3a-N3-H3b | 115.39 |
| H3a-N3-C1  | 117.78 |
| H3b-N3-C1  | 117.96 |

---

|              |        |
|--------------|--------|
| H4-N4-C1     | 113.94 |
| H4-N4-C1     | 7.83   |
| H4-N4-C5     | 121.64 |
| C1-N4-C5     | 124.42 |
| N2-H2b...C11 | 151.44 |
| N4-H4...C11  | 159.35 |

---

**(MGU)NH<sub>2</sub>NH<sub>2</sub>...Cl<sup>-</sup>**Table 243S. Computed atomic orthogonal coordinates for (MGU)NH<sub>2</sub>NH<sub>2</sub>...Cl<sup>-</sup> optimized at the DFT-B3LYP/6-31+G\*\* level.

| Atom | x        | y        | z        |
|------|----------|----------|----------|
| C11  | -0.27654 | -0.02273 | -0.00230 |
| C1   | 0.06733  | 0.02890  | 0.00247  |
| N2   | -0.01599 | 0.13357  | 0.00554  |
| N3   | 0.01580  | -0.09362 | 0.00334  |
| N4   | 0.20140  | 0.04895  | -0.00143 |
| C5   | 0.29957  | -0.05869 | -0.00496 |
| H2a  | -0.11821 | 0.11001  | 0.00323  |
| H2b  | 0.01532  | 0.22398  | -0.02636 |
| H3a  | -0.08957 | -0.09960 | 0.00198  |
| H3b  | 0.07262  | -0.17459 | 0.02216  |
| H4   | 0.23381  | 0.14222  | 0.01926  |
| H5a  | 0.40006  | -0.01818 | -0.02010 |
| H5b  | 0.27836  | -0.12695 | -0.08778 |
| H5c  | 0.29885  | -0.11407 | 0.08939  |



Table 244S. Computed bond lengths (Å) and angles (°) for (MGU)NH<sub>2</sub>NH<sub>2</sub>...Cl<sup>-</sup> optimized at the DFT-B3LYP/6-31+G\*\* level.

| Vector     | Length |
|------------|--------|
| C1-N3      | 1.329  |
| C1-N2      | 1.338  |
| C1-N4      | 1.356  |
| C5-N4      | 1.457  |
| H2a-N2     | 1.049  |
| H2b-N2     | 1.009  |
| H3a-N3     | 1.055  |
| H3b-N3     | 1.007  |
| H4-N4      | 1.009  |
| H5a-C5     | 1.094  |
| H5b-C5     | 1.094  |
| H5c-C5     | 1.094  |
| H2a...Cl1  | 2.067  |
| N2...Cl1   | 3.039  |
| H3a...Cl1  | 2.022  |
| N3a...Cl1  | 3.009  |
| Vectors    | Angle  |
| N3-C1-N2   | 118.65 |
| N3-C1-N4   | 121.31 |
| N2-C1-N4   | 120.04 |
| H5a-C5-H5b | 107.72 |
| H5a-C5-H5c | 108.23 |
| H5a-C5-N4  | 110.40 |
| H5b-C5-H5c | 109.62 |
| H5b-C5-N4  | 110.40 |
| H5c-C5-N4  | 110.40 |
| H2b-N2-H2a | 119.79 |
| H2b-N2-C1  | 120.04 |
| H2a-N2-C1  | 115.50 |
| H3b-N3-H3a | 121.35 |
| H3b-N3-C1  | 121.58 |
| H3a-N3-C1  | 116.05 |

---

|              |        |
|--------------|--------|
| H4-N4-C1     | 116.64 |
| H4-N4-C5     | 118.13 |
| C1-N4-C5     | 123.88 |
| N2-H2a...Cl1 | 153.01 |
| N3-H3a...Cl1 | 154.40 |

---

Table 245S. Computed atomic orthogonal coordinates for (MGU)NH<sub>2</sub>NH<sub>2</sub>...Cl<sup>-</sup> optimized at the *ab initio*-MP2/6-31+G\*\* level.

| Atom | x        | y        | z        |
|------|----------|----------|----------|
| C11  | 0.27479  | -0.02314 | 0.00200  |
| C1   | -0.06718 | 0.02948  | -0.00217 |
| N2   | 0.01561  | 0.13470  | -0.00600 |
| N3   | -0.01548 | -0.09283 | -0.00171 |
| N4   | -0.20117 | 0.04922  | 0.00114  |
| C5   | -0.29691 | -0.06022 | 0.00538  |
| H2a  | 0.11676  | 0.11007  | -0.00303 |
| H2b  | -0.01461 | 0.22162  | 0.03504  |
| H3a  | 0.08952  | -0.09707 | -0.00120 |
| H3b  | -0.07035 | -0.17202 | -0.03068 |
| H4   | -0.23341 | 0.13929  | -0.03060 |
| H5a  | -0.39545 | -0.01811 | 0.02290  |
| H5b  | -0.27288 | -0.12655 | 0.08824  |
| H5c  | -0.29915 | -0.11709 | -0.08782 |

Table 246S. Computed bond lengths (Å) and angles (°) for (MGU)NH<sub>2</sub>NH<sub>2</sub>...Cl<sup>-</sup> optimized at the *ab initio*-MP2/6-31+G\*\* level.

| Vector     | Length |
|------------|--------|
| C1-N3      | 1.328  |
| C1-N2      | 1.339  |
| C1-N4      | 1.355  |
| C5-N4      | 1.455  |
| H2a-N2     | 1.041  |
| H2b-N2     | 1.008  |
| H3a-N3     | 1.051  |
| H3b-N3     | 1.006  |
| H4-N4      | 1.008  |
| H5a-C5     | 1.086  |
| H5b-C5     | 1.088  |
| H5c-C5     | 1.092  |
| H2a...Cl1  | 2.067  |
| N2...Cl1   | 3.036  |
| H3a...Cl1  | 1.995  |
| N3...Cl1   | 2.985  |
| Vectors    | Angle  |
| N3-C1-N2   | 118.88 |
| N3-C1-N4   | 121.28 |
| N2-C1-N4   | 119.84 |
| H5a-C5-H5b | 108.30 |
| H5a-C5-H5c | 108.73 |
| H5a-C5-N4  | 108.07 |
| H5b-C5-H5c | 109.69 |
| H5b-C5-N4  | 109.60 |
| H5c-C5-N4  | 112.36 |
| H2b-N2-H2a | 118.93 |
| H2b-N2-C1  | 118.73 |
| H2a-N2-C1  | 114.44 |
| H3b-N3-H3a | 120.97 |
| H3b-N3-C1  | 120.78 |
| H3a-N3-C1  | 115.23 |

---

|              |        |
|--------------|--------|
| H4-N4-C1     | 116.03 |
| H4-N4-C5     | 118.10 |
| C1-N4-C5     | 122.82 |
| N2-H2a...Cl1 | 153.56 |
| N3-H3a...Cl1 | 155.93 |

---

**(MeOH)O-H...Cl<sup>-</sup>**Table 247S. Computed atomic orthogonal coordinates for (MeOH)O-H...Cl<sup>-</sup> optimized at the DFT-B3LYP/6-31+G\*\* level.

| Atom | x        | Y        | z        |
|------|----------|----------|----------|
| O1   | 0.13101  | 0.07691  | 0.00002  |
| C2   | 0.19295  | -0.04958 | 0.00000  |
| C11  | -0.16902 | -0.00746 | 0.00000  |
| H1   | 0.03283  | 0.06143  | -0.00016 |
| H2a  | 0.30169  | -0.03402 | -0.00017 |
| H2b  | 0.16671  | -0.10918 | 0.08892  |
| H2c  | 0.16644  | -0.10928 | -0.08877 |

Table 248S. Computed bond lengths (Å) and angles (°) for (MeOH)O-H...Cl<sup>-</sup> optimized at the DFT-B3LYP/6-31+G\*\* level.

| Vector   | Length |
|----------|--------|
| O1-C2    | 1.408  |
| H1-O1    | 0.994  |
| H2a-C2   | 1.098  |
| H2b-C2   | 1.102  |
| H2c-C2   | 1.102  |
| H1...Cl1 | 2.133  |
| O1...Cl1 | 3.117  |

  

| Vectors     | Angle  |
|-------------|--------|
| H1-O1-C2    | 107.13 |
| H2a-C2-H2b  | 108.27 |
| H2a-C2-H2c  | 108.28 |
| H2a-C2-O1   | 107.95 |
| H2b-C2-H2c  | 107.44 |
| H2b-C2-O1   | 112.39 |
| H2c-C2-O1   | 112.38 |
| O1-H1...Cl1 | 170.11 |

Table 249S. Computed atomic orthogonal coordinates for (MeOH)O-H...Cl<sup>-</sup> optimized at the *ab initio*-MP2/6-31+G\*\* level.

| Atom | x        | y        | z        |
|------|----------|----------|----------|
| O1   | -0.13152 | 0.07799  | -0.00002 |
| C2   | -0.18865 | -0.05143 | 0.00000  |
| C11  | 0.16671  | -0.00722 | 0.00000  |
| H1   | -0.03359 | 0.06453  | 0.00017  |
| H2a  | -0.29711 | -0.03930 | -0.00015 |
| H2b  | -0.15979 | -0.10889 | 0.08853  |
| H2c  | -0.15955 | -0.10901 | -0.08838 |



Table 250S. Computed bond lengths (Å) and angles (°) for (MeOH)O-H...Cl<sup>-</sup> optimized at the *ab initio*-MP2/6-31+G\*\* level.

| Vector   | Length |
|----------|--------|
| O1-C2    | 1.415  |
| H1-O1    | 0.989  |
| H2a-C2   | 1.091  |
| H2b-C2   | 1.094  |
| H2c-C2   | 1.094  |
| H1...Cl1 | 2.128  |
| O1...Cl1 | 3.102  |

  

| Vectors     | Angles |
|-------------|--------|
| H1-O1-C2    | 105.99 |
| H2a-C2-H2b  | 108.76 |
| H2a-C2-H2c  | 108.76 |
| H2a-C2-O1   | 107.44 |
| H2b-C2-H2c  | 107.88 |
| H2b-C2-O1   | 111.96 |
| H2c-C2-O1   | 111.96 |
| C1-H1...Cl1 | 168.12 |

**(HMB)O1-H...Cl<sup>-</sup>**Table 251S. Computed atomic orthogonal coordinates for (HMB)O1-H...Cl<sup>-</sup> optimized at the DFT-B3LYP/6-31+G\*\* level.

| Atom | x        | y        | z        |
|------|----------|----------|----------|
| C11  | -0.35706 | -0.07076 | 0.00003  |
| O1   | -0.14402 | 0.15029  | -0.00004 |
| C2   | -0.02677 | 0.08400  | -0.00002 |
| C3   | 0.09074  | 0.16125  | 0.00002  |
| C4   | 0.21631  | 0.10009  | 0.00003  |
| C5   | 0.22997  | -0.03935 | 0.00000  |
| C6   | 0.11161  | -0.11510 | -0.00003 |
| C7   | -0.01490 | -0.05641 | -0.00004 |
| C8   | 0.36665  | -0.10533 | 0.00002  |
| H1   | -0.22617 | 0.09256  | 0.00001  |
| H3   | 0.08150  | 0.26951  | 0.00004  |
| H4   | 0.30548  | 0.16273  | 0.00006  |
| H6   | 0.11816  | -0.22387 | -0.00004 |
| H7   | -0.10566 | -0.11607 | -0.00006 |
| H8a  | 0.38361  | -0.16761 | 0.08873  |
| H8b  | 0.43996  | -0.02380 | 0.00001  |
| H8c  | 0.38361  | -0.16763 | -0.08869 |

Table 252S. Computed bond lengths (Å) and angles (°) for (HMB)O1-H...Cl<sup>-</sup> optimized at the DFT- B3LYP/6-31+G\*\* level.

| Vector   | Length |
|----------|--------|
| O1-C2    | 1.347  |
| C2-C3    | 1.406  |
| C2-C7    | 1.409  |
| C3-C4    | 1.397  |
| C4-C5    | 1.401  |
| C5-C6    | 1.405  |
| C5-C8    | 1.518  |
| C6-C7    | 1.395  |
| H1-O1    | 1.004  |
| H3-C3    | 1.087  |
| H4-C4    | 1.090  |
| H6-C6    | 1.090  |
| H7-C7    | 1.086  |
| H8a-C8   | 1.097  |
| H8b-C8   | 1.096  |
| H8c-C8   | 1.097  |
| H1...Cl1 | 2.093  |
| O1...Cl1 | 3.070  |
| H7...Cl1 | 2.554  |
| C7...Cl1 | 3.425  |
| Vectors  | Angle  |
| H1-O1-C2 | 115.42 |
| O1-C2-C3 | 117.20 |
| O1-C2-C7 | 124.31 |
| C3-C2-C7 | 118.49 |
| H3-C3-C4 | 120.85 |
| H3-C3-C2 | 118.44 |
| C4-C3-C2 | 120.71 |
| H4-C4-C3 | 118.94 |
| H4-C4-C5 | 119.49 |
| C3-C4-C5 | 121.56 |
| C4-C5-C6 | 117.02 |

---

|             |        |
|-------------|--------|
| C4-C5-C8    | 121.36 |
| C6-C5-C8    | 121.61 |
| H6-C6-C7    | 118.33 |
| H6-C6-C5    | 119.17 |
| C7-C6-C5    | 122.49 |
| H7-C7-C6    | 121.79 |
| H7-C7-C2    | 118.49 |
| C6-C7-C2    | 119.72 |
| H8b-C8-H8a  | 108.59 |
| H8b-C8-H8c  | 108.59 |
| H8b-C8-C5   | 106.19 |
| H8a-C8-H8c  | 107.91 |
| H8a-C8-C5   | 112.71 |
| H8c-C8-C5   | 112.70 |
| O1-H1...Cl1 | 163.81 |
| C7-H7...Cl1 | 136.46 |

---

Table 253S. Computed atomic orthogonal coordinates for (HMB)O1-H...Cl<sup>-</sup> optimized at the *ab initio*-MP2/6-31+G\*\* level.

| Atom | x        | y        | z        |
|------|----------|----------|----------|
| C11  | -0.35287 | -0.07199 | 0.00003  |
| O1   | -0.14450 | 0.15238  | -0.00004 |
| C2   | -0.02709 | 0.08478  | -0.00002 |
| C3   | 0.09044  | 0.16169  | 0.00002  |
| C4   | 0.21583  | 0.09995  | 0.00003  |
| C5   | 0.22830  | -0.03964 | 0.00001  |
| C6   | 0.10979  | -0.11493 | -0.00003 |
| C7   | -0.01656 | -0.05552 | -0.00005 |
| C8   | 0.36401  | -0.10636 | 0.00002  |
| H1   | -0.22517 | 0.09341  | -0.00002 |
| H3   | 0.08139  | 0.26970  | 0.00004  |
| H4   | 0.30520  | 0.16179  | 0.00006  |
| H6   | 0.11586  | -0.22345 | -0.00005 |
| H7   | -0.10752 | -0.11418 | -0.00008 |
| H8a  | 0.37960  | -0.16828 | 0.08854  |
| H8b  | 0.43757  | -0.02565 | 0.00003  |
| H8c  | 0.37962  | -0.16827 | -0.08850 |

Table 254S. Computed bond lengths (Å) and angles (°) for (HMB)O1-H...Cl<sup>-</sup> optimized at the *ab initio*-MP2/6-31+G\*\* level.

| Vector   | Length |
|----------|--------|
| O1-C2    | 1.355  |
| C2-C3    | 1.405  |
| C2-C7    | 1.407  |
| C3-C4    | 1.398  |
| C4-C5    | 1.401  |
| C5-C6    | 1.404  |
| C5-C8    | 1.512  |
| C6-C7    | 1.396  |
| H1-O1    | 0.999  |
| H3-C3    | 1.084  |
| H4-C4    | 1.087  |
| H6-C6    | 1.087  |
| H7-C7    | 1.082  |
| H8a-C8   | 1.091  |
| H8b-C8   | 1.092  |
| H8c-C8   | 1.091  |
| H1...Cl1 | 2.090  |
| O1...Cl1 | 3.062  |
| H7...Cl1 | 2.490  |
| C7...Cl1 | 3.367  |
| Vectors  | Angle  |
| H1-O1-C2 | 113.90 |
| O1-C2-C3 | 116.87 |
| O1-C2-C7 | 124.22 |
| C3-C2-C7 | 118.91 |
| H3-C3-C4 | 121.00 |
| H3-C3-C2 | 118.41 |
| C4-C3-C2 | 120.58 |
| H4-C4-C3 | 119.10 |
| H4-C4-C5 | 119.58 |
| C3-C4-C5 | 121.32 |
| C4-C5-C6 | 117.32 |

---

|             |        |
|-------------|--------|
| C4-C5-C8    | 121.29 |
| C6-C5-C8    | 121.39 |
| H6-C6-C7    | 118.38 |
| H6-C6-C5    | 119.23 |
| C7-C6-C5    | 122.39 |
| H7-C7-C6    | 122.00 |
| H7-C7-C2    | 118.53 |
| C6-C7-C2    | 119.48 |
| H8a-C8-H8c  | 108.39 |
| H8a-C8-H8b  | 108.84 |
| H8a-C8-C5   | 112.24 |
| H8c-C8-H8b  | 108.84 |
| H8c-C8-C5   | 112.24 |
| H8b-C8-C5   | 106.17 |
| O1-H1...C11 | 163.84 |
| C7-H7...C11 | 137.43 |

---

**TWO-PARTICLE SYSTEMS**  
**Solvent effects on the structure of selected two-particle systems**

**(IM)N1-H...Cl<sup>-</sup>**

Table 255S. Computed atomic orthogonal coordinates for (IM)N1-H...Cl<sup>-</sup> optimized at the DFT-B3LYP/6-31G\*\* level with solvent treatment via PCM method (water).

| Atom | x        | y        | z       |
|------|----------|----------|---------|
| C11  | -0.01878 | -0.28717 | 0.00000 |
| H1   | -0.00620 | -0.07769 | 0.00000 |
| H5   | -0.20884 | 0.08186  | 0.00000 |
| N1   | 0.00000  | 0.02550  | 0.00000 |
| H2   | 0.21248  | 0.05132  | 0.00000 |
| C5   | -0.10477 | 0.11469  | 0.00000 |
| C2   | 0.11467  | 0.09800  | 0.00000 |
| N3   | 0.09141  | 0.22841  | 0.00000 |
| C4   | -0.04670 | 0.23948  | 0.00000 |
| H4   | -0.09720 | 0.33610  | 0.00000 |



Table 256S. Computed bond lengths (Å) and angles (°) for (IM)N1-H...Cl<sup>-</sup> optimized at the DFT-B3LYP/6-31G\*\* level with solvent treatment via PCM method (water).

| Vector   | Length |
|----------|--------|
| N1-C2    | 1.357  |
| N1-C5    | 1.376  |
| N3-C2    | 1.325  |
| N3-C4    | 1.386  |
| C4-C5    | 1.376  |
| H1-N1    | 1.034  |
| H2-C2    | 1.084  |
| H4-C4    | 1.090  |
| H5-C5    | 1.091  |
| C11...H1 | 2.099  |
| C11...N1 | 3.132  |

  

| Vectors     | Angle         |
|-------------|---------------|
| H1-N1-C2    | 125.74        |
| H1-N1-C5    | 126.97        |
| C2-N1-C5    | 107.29        |
| C2-N3-C4    | 104.70        |
| H2-C2-N3    | 125.63        |
| H2-C2-N1    | 122.18        |
| N3-C2-N1    | 112.19        |
| H4-C4-C5    | 127.45        |
| H4-C4-N3    | 122.18        |
| C5-C4-N3    | 110.37        |
| H5-C5-N1    | 122.08        |
| H5-C5-C4    | 132.46        |
| N1-C5-C4    | 105.45        |
| N1-H1...C11 | 180.00(fixed) |

**(IM)C2-H...Cl<sup>-</sup>**Table 257S. Computed atomic orthogonal coordinates for (IM)C2-H...Cl<sup>-</sup> optimized at the DFT-B3LYP/6-31G\*\* level with solvent treatment via PCM method (water).

| Atom | x        | y        | z       |
|------|----------|----------|---------|
| C11  | -0.06622 | -0.32715 | 0.00000 |
| H5   | 0.20075  | 0.30126  | 0.00000 |
| H4   | -0.07195 | 0.35626  | 0.00000 |
| H1   | 0.21318  | 0.04553  | 0.00000 |
| C5   | 0.11428  | 0.23546  | 0.00000 |
| C4   | -0.02092 | 0.25998  | 0.00000 |
| H2   | -0.01896 | -0.06115 | 0.00000 |
| N3   | -0.09133 | 0.14109  | 0.00000 |
| N1   | 0.12597  | 0.09801  | 0.00000 |
| C2   | 0.00000  | 0.04556  | 0.00000 |

Table 258S. Computed bond lengths (Å) and angles (°) for (IM)C2-H...Cl<sup>-</sup> optimized at the DFT-B3LYP/6-31G\*\* level with solvent treatment via PCM method (water).

| Vector      | Length |
|-------------|--------|
| N1-H1       | 1.018  |
| N1-C2       | 1.365  |
| N1-C5       | 1.379  |
| N3-C2       | 1.322  |
| N3-C4       | 1.382  |
| C2-H2       | 1.084  |
| C4-H4       | 1.090  |
| C4-C5       | 1.374  |
| C5-H5       | 1.087  |
| C5C4        | 1.374  |
| C11...H2    | 2.7.02 |
| C11...C2    | 3.785  |
| Vectors     | Angle  |
| H1-N1-C2    | 126.36 |
| H1-N1-C5    | 125.90 |
| C2-N1-C5    | 107.74 |
| C2-N3-C4    | 105.65 |
| H2-C2-N3    | 126.21 |
| H2-C2-N1    | 122.68 |
| N3-C2-N1    | 111.11 |
| H4-C4-C5    | 128.20 |
| H4-C4-N3    | 121.44 |
| C5-C4-N3    | 110.36 |
| H5-C5-C4    | 132.45 |
| H5-C5-N1    | 122.41 |
| C4-C5-N1    | 105.14 |
| C11...H2-C2 | 180.00 |

**IM...F<sup>-</sup>**  
**(IM)N1-H...F<sup>-</sup>**

Table 259S. Computed atomic orthogonal coordinates for (IM)N1...H...F<sup>-</sup> optimized at the DFT-B3LYP/6-31G\*\* level with solvent treatment via PCM method (water).

| Atom | x        | y        | z       |
|------|----------|----------|---------|
| F1   | -0.01510 | 0.28127  | 0.00000 |
| N1   | 0.00000  | 0.04163  | 0.00000 |
| C2   | -0.10372 | -0.04520 | 0.00000 |
| N3   | -0.06737 | -0.17366 | 0.00000 |
| C4   | 0.07060  | -0.16893 | 0.00000 |
| C5   | 0.11270  | -0.03736 | 0.00000 |
| H1   | -0.00796 | 0.16796  | 0.00000 |
| H2   | -0.20693 | -0.01141 | 0.00000 |
| H4   | 0.13153  | -0.25963 | 0.00000 |
| H5   | 0.21338  | 0.00474  | 0.00000 |

Table 260S. Computed bond lengths (Å) and angles (°) for (IM)N1...H...F<sup>-</sup> optimized at the DFT-B3LYP/6-31G\*\* level with solvent treatment via PCM method (water).

| Vector  | Length |
|---------|--------|
| N1-C2   | 1.353  |
| N1-C5   | 1.376  |
| N3-C2   | 1.335  |
| N3-C4   | 1.381  |
| C4-C5   | 1.381  |
| H1-F1   | 1.135  |
| H2-C2   | 1.086  |
| H4-C4   | 1.093  |
| H5-C5   | 1.091  |
| H1...N1 | 1.266  |
| F1...N1 | 2.401  |

  

| Vectors    | Angle         |
|------------|---------------|
| C2-N1-C5   | 105.04        |
| C2-N3-C4   | 103.84        |
| H2-C2-N3   | 123.93        |
| H2-C2-N1   | 121.94        |
| N3-C2-N1   | 114.13        |
| H4-C4-N3   | 121.93        |
| H4-C4-C5   | 128.36        |
| N3-C4-C5   | 109.71        |
| H5-C5-N1   | 122.28        |
| H5-C5-C4   | 130.44        |
| N1-C5-C4   | 107.28        |
| H1...N1-C2 | 126.33        |
| H1...N1-C5 | 128.63        |
| F1-H1...N1 | 180.00(fixed) |

## ENERGY

Table 261S. Total electronic energy (Eel, hartrees) for the selected isolate molecules and adduct systems as computed through Gaussian98 via *ab initio* and DFT methods. IM = 1,3-imidazole, PYM = 1,3-pyrimidine, MePym = 4-methyl-1,3-pyrimidine, AA = acetamide, MA = methylammonium, MAA = N-methylacetamide, , MAB = methylamine, HMB = hydroxyl-4-methylbenzene, MeOH = methanol, MGU = methylguanidinium. In the case of aggregates, particle number 1 is the first typed, number 2 is the second one (i.e. Cl-H...Cl<sup>-</sup>, Cl-H is 1; Cl<sup>-</sup> is 2); so BSSE correction 1 means that the massge test was performed by removing the nuclei of particle 1.

| Theory                         | Molecule/Eel          |                      |                       |             |                        |                              |              |
|--------------------------------|-----------------------|----------------------|-----------------------|-------------|------------------------|------------------------------|--------------|
| <b>Isolate Monoatomic Ions</b> |                       |                      |                       |             |                        |                              |              |
|                                | <b>Cl<sup>-</sup></b> | <b>F<sup>-</sup></b> |                       |             |                        |                              |              |
| MP2/6-31+G**                   | -459.67115            | -99.62385            |                       |             |                        |                              |              |
| MP4(SDTQ)/6-31+G**             | -459.68584            | ---                  |                       |             |                        |                              |              |
| B3LYP/6-31G**                  | -460.25223            | -99.75409            |                       |             |                        |                              |              |
| B3LYP/6-31+G**                 | -460.27473            | -99.85969            |                       |             |                        |                              |              |
| <b>Isolate Molecules</b>       |                       |                      |                       |             |                        |                              |              |
|                                | <b>H-F</b>            | <b>H-Cl</b>          | <b>H<sub>2</sub>O</b> | <b>IM</b>   | <b>IMH<sup>+</sup></b> | <b>PYM</b>                   | <b>MePYM</b> |
| RHF/6-31G*                     | -100.00291            | ---                  | ---                   | ---         | ---                    | ---                          | ---          |
| MP2/6-31+G**                   | -100.21581            | -460.20762           | -76.23311             | -225.56846  | -225.93974             | -263.55699<br>(-263.55675§)  | ---          |
| MP3/6-31+G**                   | -100.21481            | ---                  | ---                   | ---         | ---                    | -263.57221§<br>(-263.57221§) | ---          |
| MP4(SDTQ)/6-31+G**             | -100.22298            | ---                  | ---                   | -225.62499§ | ---                    | ---                          | ---          |
| CCSD(T)/6-31G**                | -100.20115            | -460.22457           | -76.23158             | -225.60592  | ---                    | -263.60579§                  | ---          |
| CCSD(T)/6-31+G**               | -100.22158            | -460.22691           | -76.24439             | ---         | ---                    | ---                          | ---          |
| CCSD(T)/6-31++G**              | ---                   | -460.22706           | -76.24468             | ---         | ---                    | ---                          | ---          |

|                       |            |            |           |            |            |            |            |
|-----------------------|------------|------------|-----------|------------|------------|------------|------------|
| B3LYP/LANL2DZ         | ---        | ---        | ---       | ---        | ---        | ---        | -303.58179 |
| B3LYP/6-31G**         | -100.42746 | -460.80078 | -76.41974 | -226.22309 | ---        | -264.32949 | -303.65460 |
| B3LYP/6-31+G**        | -100.45137 | -460.80321 | -76.43405 | -226.23538 | -226.60810 | -264.34081 | -303.66670 |
| B3LYP/6-31++G**       | ---        | -460.80327 | -76.43412 | ---        | ---        | ---        | ---        |
| RHF/6-31G* †          | -100.00291 | -460.05998 | -76.01075 | ---        | ---        | ---        | ---        |
| RHF/6-31+G* †         | -100.01487 | -460.06102 | -76.01774 | ---        | ---        | ---        | ---        |
| MP2/6-311+G(3df,2p) # | ---        | -460.29699 | ---       | ---        | ---        | ---        | ---        |

**Isolate Molecules**

|                | <b>AA</b>  | <b>MAA</b> | <b>MA</b> | <b>MAB</b> | <b>HMB</b> | <b>MeOH</b> | <b>MGU</b> |
|----------------|------------|------------|-----------|------------|------------|-------------|------------|
| B3LYP/6-31+G** | -209.23796 | -248.54874 | -96.22822 | -95.87185  | -346.81408 | -115.73487  | -245.10152 |
| MP2/6-31+G**   | -208.62882 | -247.80372 | -95.91782 | -95.55901  | -345.75024 | -115.39352  | -244.36477 |

**Isolate Molecules in reaction field&**

|                 | <b>HF</b>  | <b>HCl</b> | <b>H<sub>2</sub>O</b> | <b>IM</b>  | <b>PYM</b> |
|-----------------|------------|------------|-----------------------|------------|------------|
| B3LYP/6-31G**   | -100.43778 | -460.80467 | ---                   | -226.24360 | ---        |
| B3LYP/6-31+G**  | ---        | -460.80722 | ---                   | -226.25228 | -264.35997 |
| B3LYP/6-31+G**~ | ---        | ---        | ---                   | -226.25172 | ---        |

**Isolate Molecules in reaction field&**

|                | <b>MAA</b> | <b>MA</b> | <b>MGU</b> |
|----------------|------------|-----------|------------|
| B3LYP/6-31+G** | -284.56778 | -96.34109 | -245.21067 |

**Molecular Aggregates**

|                     | <b>Cl-H...Cl<sup>-</sup></b> | <b>F-H...F<sup>-</sup></b> | <b>ClH...OH<sub>2</sub></b> | <b>HO-H...ClH</b> | <b>FH...OH<sub>2</sub></b> | <b>HO-H...FH</b> |
|---------------------|------------------------------|----------------------------|-----------------------------|-------------------|----------------------------|------------------|
| RHF/6-31G*          | ---                          | ---                        | ---                         | ---               | -176.02806                 | ---              |
| CCSD(T)/6-31G**     | ---                          | ---                        | -536.46694                  | ---               | -176.44793                 | -176.43802       |
| (BSSE correction 1) |                              |                            | -76.23317                   |                   | -76.23337                  | -76.23185        |

|                     |            |            |            |            |            |            |
|---------------------|------------|------------|------------|------------|------------|------------|
| (BSSE correction 2) |            |            | -460.22535 |            | -100.20180 | -100.20285 |
| CCSD(T)/6-31+G**    | ---        | ---        | -536.48157 | ---        | -176.48140 | -176.46989 |
| (BSSE correction 1) |            |            | -76.24598  |            | -76.24642  | -76.24504  |
| (BSSE correction 2) |            |            | -460.22820 |            | -100.22209 | -100.22181 |
| CCSD(T)/6-311++G**  | -921.01781 | -200.03573 | -536.56057 | ---        | ---        | ---        |
| B3LYP/6-31G**       | -921.10225 | -200.28999 | -537.23341 | -537.22185 | -176.86369 | -176.85312 |
| B3LYP/6-31+G**      | ---        | ---        | -537.24779 | -537.23774 | -176.90146 | -176.88893 |
| B3LYP/6-31++G**     | ---        | ---        | -537.24795 | ---        | ---        | ---        |
| B3LYP/6-311++G**    | -921.17766 | -200.44523 | -537.30278 | ---        | ---        | ---        |
| MP2/6-31+G**        | ---        | ---        | ---        | ---        | ---        | -176.45284 |
| (BSSE correction 1) |            |            |            |            |            | -76.23371  |
| (BSSE correction 2) |            |            |            |            |            | -100.21603 |

### Molecular Aggregates

|                     | (IM)N1-H...Cl <sup>-</sup> | (IM)C2-H...Cl <sup>-</sup> | (IM)C4-H...Cl <sup>-</sup> | (IM)C5-H...Cl <sup>-</sup> | (IM)N1-H...F <sup>-</sup> | (IM)C2-H...F <sup>-</sup> | (IMH <sup>+</sup> )N1...H <sup>+</sup><br>...Cl <sup>-</sup> |
|---------------------|----------------------------|----------------------------|----------------------------|----------------------------|---------------------------|---------------------------|--------------------------------------------------------------|
| B3LYP/6-31G**       | -686.51920                 | -686.49297                 | -686.48135                 | -686.49686                 | -326.10935                | -326.05063                | ---                                                          |
| B3LYP/6-31+G**      | -686.54793                 | -686.52402                 | -686.51315                 | -686.52803                 | ---                       | ---                       | -687.05590                                                   |
| MP2/6-31+G**        | -685.28240                 | ---                        | ---                        | ---                        | ---                       | ---                       | -685.79360                                                   |
| (BSSE correction 1) | -459.67590                 |                            |                            |                            |                           |                           | -460.20957                                                   |
| (BSSE correction 2) | -225.56709                 |                            |                            |                            |                           |                           | -225.56954                                                   |
| MP4(STDQ)/6-31+G**  | -685.35262 <sup>§</sup>    | ---                        | ---                        | ---                        | ---                       | ---                       | ---                                                          |
| (BSSE correction 1) | -459.69091 <sup>§</sup>    |                            |                            |                            |                           |                           |                                                              |
| (BSSE correction 2) | -225.62296 <sup>§</sup>    |                            |                            |                            |                           |                           |                                                              |

### Molecular Aggregates

|                | (IM)N-H...N(IM) (coplanar) | (IM)N-H...N(IM) (free) | (IM)C2-H...N(IM) (C2-H2...N1' 180.0) |
|----------------|----------------------------|------------------------|--------------------------------------|
| B3LYP/6-31+G** | -452.48378                 | -452.48484             | -452.47518                           |



|                             |                                   |                                                      |                                   |                                     |                                 |                              |
|-----------------------------|-----------------------------------|------------------------------------------------------|-----------------------------------|-------------------------------------|---------------------------------|------------------------------|
| MP2/6-31+G**                | -451.15334\$                      | ---                                                  | ---                               | ---                                 | ---                             | ---                          |
| (BSSE correction 1)         | -225.56992\$                      |                                                      |                                   |                                     |                                 |                              |
| (BSSE correction 2)         | -225.56915\$                      |                                                      |                                   |                                     |                                 |                              |
| <b>Molecular Aggregates</b> |                                   |                                                      |                                   |                                     |                                 |                              |
|                             | <b>(PYM)C2-H...Cl<sup>-</sup></b> | <b>(PYM)C5-H...Cl<sup>-</sup></b>                    | <b>(PYM)C6-H...Cl<sup>-</sup></b> | <b>(MePYM)C7-H...Cl<sup>-</sup></b> |                                 |                              |
| B3LYP/6-31G**               | ---                               | ---                                                  | ---                               | -763.93089                          |                                 |                              |
| B3LYP/6-31+G**              | -724.62089                        | 724.63635                                            | -724.63042                        | ---                                 |                                 |                              |
| MP2/6-31+G**                | -723.23546\$                      | -723.25304\$                                         | -723.24565\$                      | ---                                 |                                 |                              |
| (BSSE correction 1)         | -459.67410\$                      | -459.67499\$                                         | -459.67453\$                      |                                     |                                 |                              |
| (BSSE correction 2)         | -263.55648\$                      | -263.55686\$                                         | -263.55651\$                      |                                     |                                 |                              |
| <b>Molecular Aggregates</b> |                                   |                                                      |                                   |                                     |                                 |                              |
|                             | <b>(PYM)C2-H...N1(PYM)</b>        | <b>(PYM)C2-H...N1(PYM)/<br/>(PYM)C6'-H...N3(PYM)</b> | <b>(PYM)C5-H...N1(PYM)</b>        |                                     |                                 |                              |
| B3LYP/6-31G**               | ---                               | -528.66489                                           | -528.66342                        |                                     |                                 |                              |
| B3LYP/6-31+G**              | -528.68391                        | -528.68541                                           | -528.68480                        |                                     |                                 |                              |
| MP2/6-31+G**                | -527.11836\$                      | -527.12085\$                                         | -527.11969 § (-527.11972\$)       |                                     |                                 |                              |
| (BSSE correction 1)         | -263.55776\$                      | -263.55780\$                                         | -263.55791 § (-263.55789\$)       |                                     |                                 |                              |
| (BSSE correction 2)         | -263.55752\$                      | -263.55793\$                                         | -263.55751 § (-263.55756\$)       |                                     |                                 |                              |
| MP3/6-31+G**                | ---                               | ---                                                  | -527.14999 § (-527.14995\$)       |                                     |                                 |                              |
| (BSSE correction 1)         |                                   |                                                      | -263.57332 § (-263.57323\$)       |                                     |                                 |                              |
| (BSSE correction 2)         |                                   |                                                      | -263.57292 § (-263.57292\$)       |                                     |                                 |                              |
| <b>Molecular Aggregates</b> |                                   |                                                      |                                   |                                     |                                 |                              |
|                             | <b>(AA)NH...Cl<sup>-</sup></b>    | <b>(MAA)NH...Cl<sup>-</sup></b>                      | <b>(MA)N...H-Cl</b>               | <b>(MAB)NH...Cl<sup>-</sup></b>     | <b>(HMB)OH...Cl<sup>-</sup></b> | <b>MeOH...Cl<sup>-</sup></b> |
| B3LYP/6-31+G**              | -669.54618                        | -708.85704                                           | -556.69493                        | -556.15988                          | -807.12115                      | -576.03341                   |
| MP2/6-31+G**                | -668.33620                        | -707.51306                                           | -555.78458                        | -555.24522                          | -805.45789                      | -575.09019                   |

|                     |            |            |            |            |            |            |
|---------------------|------------|------------|------------|------------|------------|------------|
| (BSSE correction 1) | -459.67545 | -459.67592 | -460.20782 | -459.67332 | -459.67729 | -459.67449 |
| (BSSE correction 2) | -208.62761 | -247.80311 | -95.56121  | -95.55875  | -345.74767 | -115.39310 |

### Molecular Aggregates

|                     | (MGU)NH <sub>2</sub> ..Cl <sup>-</sup> | (MGU)(CH <sub>3</sub> )NH..Cl <sup>-</sup> | (MAA)NH...F <sup>-</sup> |
|---------------------|----------------------------------------|--------------------------------------------|--------------------------|
| B3LYP/6-31+G**      | -705.54452                             | -705.54606                                 | -348.46996               |
| MP2/6-31+G**        | -704.20801                             | -704.21068                                 | -347.48901               |
| (BSSE correction 1) | -459.67859                             | -459.67814                                 |                          |
| (BSSE correction 2) | -244.35907                             | -244.35919                                 |                          |

### Molecular Aggregates in reaction field&

|                       | (IM)N1-H...Cl <sup>-</sup> | (IM)N1...H...F <sup>-</sup> |
|-----------------------|----------------------------|-----------------------------|
| B3LYP/6-31G** (water) | -686.62412                 | -326.21230                  |

§ Single point calculation with the coordinates optimized at B3LYP/6-31G\*\* level.

\$ Single point calculation with the coordinates optimized at B3LYP/6-31+G\*\* level.

† Ref. 35-37.

# Ref. 38.

& Dielectric constant for water unless otherwise specified.

~ Dielectric constant for methanol.

## VIBRATION FREQUENCIES

Table 262S. Selected vibration ( $\text{cm}^{-1}$ ) for isolate molecules and aggregates obtained from the analysis of the hessian. Force constants ( $\text{mdyne}/\text{\AA}$ ) and IR intensities ( $\text{km}/\text{mol}$ ) are given in parenthesis in the order.

|                  | H-F                                                                                                                                         | H-Cl                                                                                                                                         | H <sub>2</sub> O                                                                  |
|------------------|---------------------------------------------------------------------------------------------------------------------------------------------|----------------------------------------------------------------------------------------------------------------------------------------------|-----------------------------------------------------------------------------------|
| B3LYP/6-31G**    | 4084.8 (10.4043; 61.0551)                                                                                                                   |                                                                                                                                              |                                                                                   |
| B3LYP/6-31G**&   | 3887.4 (9.4228; 59.3220)                                                                                                                    |                                                                                                                                              |                                                                                   |
| B3LYP/6-31+G**   | 4069.9 (10.3281; 114.8018)                                                                                                                  | 2943.0 (5.2869; 22.0887)                                                                                                                     | 1603.1 (1.6411; 91.2244)<br>3809.3 (8.9293; 6.4134)<br>3931.9 (9.8654; 57.2947)   |
| B3LYP/6-31+G**&  |                                                                                                                                             | 2880.9 (5.0660; 21.8644)                                                                                                                     |                                                                                   |
| MP2/6-31+G**     |                                                                                                                                             |                                                                                                                                              | 1623.0 (1.6815; 92.8970)<br>3867.3 (9.2030; 10.0857)<br>4014.2 (10.2798; 66.7177) |
|                  | <b>FH...OH<sub>2</sub></b>                                                                                                                  | <b>HO-H...FH</b>                                                                                                                             |                                                                                   |
| B3LYP/6-31G**    |                                                                                                                                             | 4083.7 (10.3983; 83.6761) $\nu_{\text{F-H}}$<br>3807.3 (8.9266; 32.1312) $\nu_{\text{O-H}}$<br>3911.4 (9.7382; 67.6479) $\nu_{\text{O-H}}$   |                                                                                   |
| B3LYP/6-31+G**   | 3659.9 (8.3697; 976.5180) $\nu_{\text{F-H}}$<br>3825.7 (8.9976; 12.0123) $\nu_{\text{O-H}}$<br>3947.5 (9.9609; 123.8684) $\nu_{\text{O-H}}$ | 4056.9 (10.2616; 138.4978) $\nu_{\text{F-H}}$<br>3809.7 (8.9319; 138.4978) $\nu_{\text{O-H}}$<br>3925.3 (9.8258; 99.4225) $\nu_{\text{O-H}}$ |                                                                                   |
| CCSD(T)/6-31+G** |                                                                                                                                             |                                                                                                                                              |                                                                                   |
| MP2/6-31+G**     |                                                                                                                                             | 4104.7 (10.5047; 150.2562) $\nu_{\text{F-H}}$                                                                                                |                                                                                   |

|                             |                                 |                                  |                                  |
|-----------------------------|---------------------------------|----------------------------------|----------------------------------|
|                             | 3870.7 (9.2228; 29.1431) VO-H   |                                  |                                  |
|                             | 4007.3 (10.2351; 96.0553) VO-H  |                                  |                                  |
| <b>ClH...OH<sub>2</sub></b> |                                 |                                  |                                  |
| B3LYP/6-31+G**              | 2709.8 (4.4863; 646.1660) vCl-H |                                  |                                  |
|                             | 3815.8 (8.9513; 17.6650) VO-H   |                                  |                                  |
|                             | 3939.1 (9.9145; 104.6889) VO-HI |                                  |                                  |
| <b>IM</b>                   |                                 | <b>(IM)N1-H...Cl<sup>-</sup></b> | <b>(IM)C2-H...Cl<sup>-</sup></b> |
| B3LYP/6-31G**               | 3667.5 (8.5729; 57.7220) vN-HI  |                                  | 3670.9 (8.5819; 38.9381) vN-HI   |
|                             | 3267.1 (6.8958; 0.9525) vC-H2   |                                  | 2998.9 (5.9220; 609.9454) vC-H2  |
|                             | 3262.6 (6.8478; 4.5833) vC-H4   |                                  | 3667.5 (8.5694; 50.4677) vN-HI   |
|                             | 3291.8 (7.0481; 1.2684) vC-H5   |                                  | 3070.2 (6.1854; 484.3194) vC-H2  |
| MP2/6-31+G**                | 3724.1 (8.8461; 77.3160) vN-HI  |                                  |                                  |
|                             |                                 |                                  |                                  |
|                             |                                 | <b>(IM)C5-H...Cl<sup>-</sup></b> |                                  |
| B3LYP/6-31G**               | 3671.0 (8.5806; 14.8471) vN-HI  |                                  |                                  |
|                             | 3280.0 (6.9605; 3.8073) vC-H4   |                                  |                                  |
| B3LYP/6-31+G**              | 3672.0 (8.5878; 24.6168) vN-HI  |                                  |                                  |
|                             | 3136.4 (6.4124; 291.5873) vC-H4 |                                  |                                  |
|                             |                                 | <b>(IM)N1-H...N(IM)</b>          | <b>(IM)C2-H...N(IM)</b>          |
|                             |                                 | <b>(coplanar)</b>                | <b>(C2-H...N 180° fixed)</b>     |
| B3LYP/6-31+G**              | 3260.5 (6.8621; 3.6616) vN-HI   | 3260.8 (6.8638; 3.0271) vN-HI    | 3669.9 (8.5829; 51.4803) vN-HI   |

|                |                                                                                           |                                                                 |                                                                                           |
|----------------|-------------------------------------------------------------------------------------------|-----------------------------------------------------------------|-------------------------------------------------------------------------------------------|
|                | 3667.1 (8.5740; 75.0519) $\nu_{\text{N}'-\text{H}1'}$<br>There is an imaginary frequency. | 3666.6 (8.5717; 74.6994) $\nu_{\text{N}'-\text{H}1'}$           | 3667.6 (8.5740; 64.4861) $\nu_{\text{N}'-\text{H}1'}$<br>There is an imaginary frequency. |
|                | <b>IMH<sup>+</sup></b>                                                                    | <b>(IM)N1...H<sup>+</sup>...Cl<sup>-</sup></b>                  |                                                                                           |
| B3LYP/6-31+G** | 3617.4(8.3412; 363.6195) $\nu_{\text{N}-\text{H}(1,3)}$                                   | 1902.6 (2.2651; 3476.3718) $\nu_{\text{Cl}-\text{H}1}$          |                                                                                           |
|                | 3624.2 (8.4128;28.5526) $\nu_{\text{N}-\text{H}(1,3)}$                                    | 3666.5 (8.5720; 76.2819) $\nu_{\text{N}-\text{H}3}$             |                                                                                           |
| MP2/6-31+G**   | 3666.0 (8.5740; 393.6321) $\nu_{\text{N}-\text{H}(1,3)}$                                  | 2416.4 (3.5891; 2409.1485) $\nu_{\text{Cl}-\text{H}1}$          |                                                                                           |
|                | 3672.4 (8.6441; 31.2580) $\nu_{\text{N}-\text{H}(1,3)}$                                   | 3719.7 (8.8276; 93.8078) $\nu_{\text{N}-\text{H}3}$             |                                                                                           |
|                | <b>PYM</b>                                                                                | <b>(PYM)C2-H...Cl<sup>-</sup></b>                               | <b>(PYM)C2-H...N1'(PYM)/(PYM)C6'-H...N3'(PYM)</b>                                         |
| B3LYP/6-31+G** | 3192.1 (6.5531; 15.6651) $\nu_{\text{C}2-\text{H}}$                                       | 3059.1 (6.0987; 320.5396) $\nu_{\text{C}2-\text{H}}$            | 3189.9 (6.5623; 5.6287) $\nu_{\text{C}2-\text{H}}$<br>There is an imaginary frequency.    |
|                | <b>(PYM)C5-H...Cl<sup>-</sup></b>                                                         | <b>(PYM)C6-H...Cl<sup>-</sup></b>                               |                                                                                           |
| B3LYP/6-31+G** | 3020.6 (5.9416; 550.0952) $\nu_{\text{C}5-\text{H}}$                                      | 3028.9 (5.9750; 396.9294) $\nu_{\text{C}6-\text{H}}$            |                                                                                           |
|                | 3159.5 (6.4028; 46.6804) $\nu_{\text{C}2-\text{H}}$                                       | 3159.2 (6.4081; 39.4463) $\nu_{\text{C}2-\text{H}}$             |                                                                                           |
|                | <b>AA</b>                                                                                 | <b>(AA)N-H...Cl<sup>-</sup></b>                                 |                                                                                           |
| B3LYP/6-31+G** | 3601.1 (7.9897; 36.2015) $\nu_{\text{NH}}$                                                | 3125.6 (6.2615; 1067.0896) $\nu_{\text{NH}} + \nu_{\text{CH}3}$ |                                                                                           |
|                | 3744.3 (9.1285; 41.4036) $\nu_{\text{NH}}$                                                | 3139.0 (6.3764; 393.5288) $\nu_{\text{NH}} + \nu_{\text{CH}3}$  |                                                                                           |
|                |                                                                                           | 3656.3 (8.5225; 29.8931) $\nu_{\text{NH}}$                      |                                                                                           |
| MP2/6-31+G**   | 3659.8 (8.2585; 45.1757) $\nu_{\text{NH}}$                                                | 3238.5 (6.8312; 60.0307) + $\nu_{\text{CH}3}$                   |                                                                                           |
|                | 3809.2 (9.4383; 49.5114) $\nu_{\text{NH}}$                                                | 3261.9 (6.7525; 1318.9938) $\nu_{\text{NH}} + \nu_{\text{CH}3}$ |                                                                                           |
|                |                                                                                           | 3733.8 (6.7525; 1318.9938) $\nu_{\text{NH}}$                    |                                                                                           |

|                |                                             |                                                                    |                                                           |
|----------------|---------------------------------------------|--------------------------------------------------------------------|-----------------------------------------------------------|
|                | <b>MAA</b>                                  | <b>(MAA)N-H...Cl<sup>-</sup></b>                                   |                                                           |
| B3LYP/6-31+G** | 3652.5 (8.4719; 22.8543) $\nu_{\text{NH}}$  | 3144.7 (6.3694; 1074.2019) $\nu_{\text{NH}}$                       |                                                           |
| MP2/6-31+G**   | 3727.0 (8.8261; 37.5779) $\nu_{\text{NH}}$  | 3231.6 (6.7778; 566.2145) $\nu_{\text{NH}} + \nu_{\text{CH}_3}$    |                                                           |
|                | There is an imaginary frequency.            | 3242.1 (6.7848; 920.6167) $\nu_{\text{NH}} + \nu_{\text{CH}_3}$    |                                                           |
|                | <b>MA</b>                                   | <b>(MA)N...H...Cl<sup>-</sup></b>                                  |                                                           |
| B3LYP/6-31+G** | 3401.8 (7.0319; 47.0931) $\nu_{\text{NH}}$  | 1517.5 (1.4607; 661.2298) $\nu_{\text{Cl-H}}$                      |                                                           |
|                | 3488.8 (7.8439; 124.5034) $\nu_{\text{NH}}$ | 1491.9 ((1.4479; 359.5643) $\nu_{\text{NH}_2} + \nu_{\text{Cl-H}}$ |                                                           |
|                | 3489.3 (7.8462; 124.5674) $\nu_{\text{NH}}$ | 3585.3 (8.2901; 17.7382) $\nu_{\text{NH}}$                         |                                                           |
|                |                                             | 3500.4 (7.5807; 5.0138) $\nu_{\text{NH}}$                          |                                                           |
| MP2/6-31+G**   | 3464.0 (7.2991; 53.7963) $\nu_{\text{NH}}$  | 2158.3 (2.8770; 2523.5043) $\nu_{\text{ClH}} + \nu_{\text{NH}}$    |                                                           |
|                | 3575.0 (8.2317; 134.6890) $\nu_{\text{NH}}$ | 3569.7 (7.8889; 3.2435) $\nu_{\text{NH}}$                          |                                                           |
|                | 3575.4 (8.2335; 134.8086) $\nu_{\text{NH}}$ | 3670.4 (8.6793; 15.0143) $\nu_{\text{NH}}$                         |                                                           |
|                | <b>MAB</b>                                  | <b>(MAB)NH...Cl<sup>-</sup></b>                                    |                                                           |
| B3LYP/6-31+G** | 3513.1 (7.6285; 0.4991)                     | 3326.1 (6.9481; 408.1720)                                          |                                                           |
|                | 3601.2 (8.3606; 1.7444)                     | 3525.7 (7.8923; 17.9341)                                           |                                                           |
| MP2/6-31+G**   | 3590.7 (7.9754; 0.1130)                     | 3445.3 (7.4287; 336.5644)                                          |                                                           |
|                | 3697.8 (8.8132; 3.9856)                     | 3621.8 (8.3564; 30.2328)                                           |                                                           |
|                | <b>MeOH</b>                                 | <b>(MeOH)OH...Cl<sup>-</sup></b>                                   |                                                           |
| B3LYP/6-31+G** | 3839.7 (9.2669; 28.0942) $\nu_{\text{O-H}}$ | 3309.2 (6.9012; 1257.9276) $\nu_{\text{O-H}}$                      |                                                           |
| MP2/6-31+G**   | 3897.3 (9.5488; 34.0101) $\nu_{\text{O-H}}$ | 3437.8 (7.4439; 1117.5219) $\nu_{\text{O-H}}$                      |                                                           |
|                | <b>MGU</b>                                  | <b>(MGU)NH<sub>2</sub>NH<sub>2</sub>...Cl<sup>-</sup></b>          | <b>(MGU)NH<sub>2</sub>NH...Cl<sup>-</sup></b>             |
| B3LYP/6-31+G** | 3602.3 (8.0060; 192.2091)                   | 2996.9 (5.7176; 2590.7084) $\nu_{\text{N-H}_2\text{a}}$            | 2818.9 (5.1232; 722.3038) $\nu_{\text{NH}}(2\text{b}, 4)$ |

|                |                                 |                                      |                                         |
|----------------|---------------------------------|--------------------------------------|-----------------------------------------|
|                | VN-H(2a,2b,3a,3b)               | 2823.2 (5.0972; 431.8023) vN-H3a     | 3015.4 (5.6268; 618.2597)vNH2b+vCH3     |
|                | 3612.2 (8.0696; 126.3175)       | 3656.1 (8.4904; 41.1479) vN-H4       | 3028.5 (5.7889; 1549.2417)vNH2b+vCH3    |
|                | VN-H(2a,2b,3a,3b)               |                                      | 3627.7 (8.1191; 55.8883) vNH(3a,3b)     |
|                | 3724.3 (9.0408; 96.3697)        |                                      | 3678.9 (8.6291; 69.6928) vNH2a          |
|                | VN-H(2a,2b,3a,3b)               |                                      | 3750.5 (9.1554; 65.5217) vNH(3a,3b)     |
|                | 3729.3 (9.0657; 132.7382)       |                                      |                                         |
|                | VN-H(2a,2b,3a,3b)               |                                      |                                         |
|                | 3634.8 (8.3907; 70.8345) vN-H4  |                                      |                                         |
| MP2/6-31+G**   | 3662.3 (8.2721; 224.4326)       | 2906.4 (5.4037; 808.7985)            | 3194.6 (6.4644; 1424.4196) vNH(2a,2b,4) |
|                | VN-H(2a,2b,3a,3b)               | VN-H(2a,2b,3a,3b)                    | 3668.3 (8.3085; 56.8486) vNH(3a,3b)     |
|                | 3670.4 (8.3320; 138.2874)       | 3121.5 (6.1283; 1463.5228)           | 3736.1 (8.9068; 86.4433) vNH(2a,2b)     |
|                | VN-H(2a,2b,3a,3b)               | VN-H(2a,3a) + vCH3                   | 3799.0 (9.3770; 66.0391) vNH(3a,3b)     |
|                | 3800.3 (9.4146; 87.4460)        | 3715.5 (8.7692; 60.8991) vN-H4       |                                         |
|                | VN-H(2a,2b,3a,3b)               | 3735.4 (8.8979; 95.9092) vN-H(2a,2b) |                                         |
|                | 3802.2 (9.4299; 170.2081)       | 3753.7 (8.9819; 90.7784) vN-H(3a,3b) |                                         |
|                | VN-H(2a,2b,3a,3b)               |                                      |                                         |
|                | 3670.4 (8.3320; 138.2874) vN-H4 |                                      |                                         |
|                | 3693.8 (8.6693; 90.4686) vN-H4  |                                      |                                         |
|                | <b>HMB</b>                      | <b>(HMB)OH...Cl<sup>-</sup></b>      |                                         |
| B3LYP/6-31+G** | 3829.7 (9.2149; 56.6372) vO-H   | 3114.2 (6.1343; 1899.1950) vO-H      |                                         |

---

&Dielectric constant for water.
